# Supplementary material for: Characterizing Changes in the Rate of Protein-Protein Dissociation upon Interface Mutation Using Hotspot Energy and Organization
Source: PubMed Central journal article supplement (PMC3764008; doi:10.1371/journal.pcbi.1003216), 2013-09-05

**PCCs of Hotspot Cooperativity Descriptors with  $\Delta\log_{10}(\text{Koff})$**

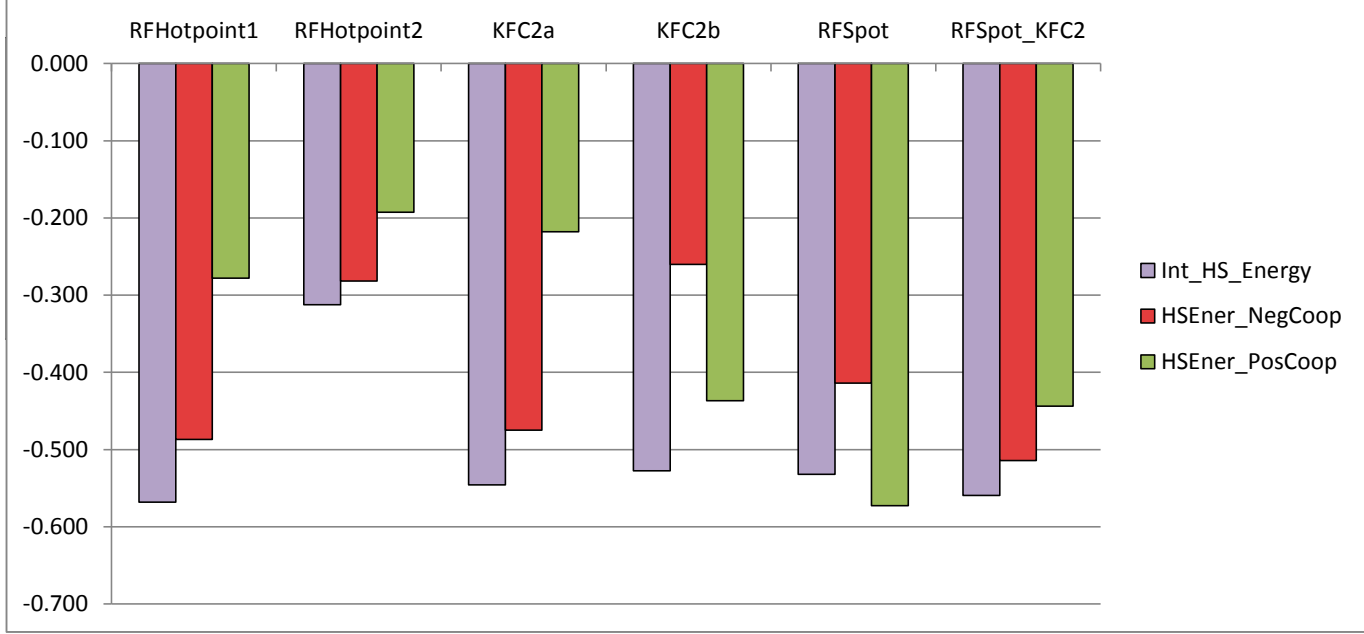

Supplement: pcbi.1003216.s005.pdf [file pcbi.1003216.s005.pdf]
