# Supplementary material for: Characterizing Changes in the Rate of Protein-Protein Dissociation upon Interface Mutation Using Hotspot Energy and Organization
Source: PubMed Central journal article supplement (PMC3764008; doi:10.1371/journal.pcbi.1003216), 2013-09-05
Supplement: pcbi.1003216.s011.pdf [file pcbi.1003216.s011.pdf]

## Supplementary Text S1: Molecular Descriptor Set

---

| Molecular Descriptor                  | Description                                                                                      |
|---------------------------------------|--------------------------------------------------------------------------------------------------|
| DCOMPLEX                              | Atom Level Statistical Potential [1]                                                             |
| GEOMETRIC                             | Geometric packing potential function                                                             |
| OPUS_PSP1                             | Orientation-dependent Statistical All-atom Potential Derived from Side-chain Packing term 1 [2]  |
| OPUS_PSP2                             | Orientation-dependent Statistical All-atom Potential Derived from Side-chain Packing term 2 [2]  |
| OPUS_PSP3                             | Orientation-dependent Statistical All-atom Potential Derived from Side-chain Packing term 3 [2]  |
| NIP                                   | Normalized interface packing (NIP) [3]                                                           |
| NSc                                   | Normalized Surface complementarity (NSc) score [3]                                               |
| CHARM_total                           | CHARMM energy term [4]                                                                           |
| CHARM_elec                            | CHARMM energy term [4]                                                                           |
| CHARM_gb                              | CHARMM energy term [4]                                                                           |
| CHARM_sasa                            | CHARMM energy term [4]                                                                           |
| CHARM_gb+sasa                         | CHARMM energy term [4]                                                                           |
| CHARM_vdwaals                         | CHARMM energy term [4]                                                                           |
| ACE19_HYDRophobic                     | CHARMM19 force field ACE19_COUL - Hydrophobic Burial Term                                        |
| ACE19_SELF                            | CHARMM19 force field ACE19_SELF - Electrostatic self-energy (Solvation)                          |
| ACE19_SCREENing                       | CHARMM19 force field ACE19_SCRE - Screening contribution (Solvation)                             |
| ACE19_COULomb                         | CHARMM19 force field ACE19_COUL - Hydrophobic Burial Term                                        |
| ACE19_SOLVation                       | CHARMM19 force field ACE19_SOLV - sum of ACE19_SELF+ACE19_SCRE                                   |
| ACE19_INTERaction                     | CHARMM19 force field ACE19_INTE - sum of ACE19_SCRE+ACE19_COUL                                   |
| ACE19_SASL                            | CHARMM19 force field ACE19_SASL- SASA Solvation energy                                           |
| PY_fa_atr                             | Lennard-jones attractive [5]                                                                     |
| PY_fa_dun                             | Internal energy of side-chain rotamers as derived from Dunbrack's statistics based pair term [5] |
| PY_fa_pair                            | Favors salt bridges [5]                                                                          |
| PY_fa_sol                             | Lazaridis-jarplus Solvation Energy[5]                                                            |
| PY_hbond_lr_bb                        | Backbone-backbone H-bonds distant in primary sequence[5]                                         |
| PY_hbond_sr_bb                        | Backbone-backbone H-bonds close in primary sequence[5]                                           |
| PY_fa_intra_rep                       | Lennard-jones repulsive between atoms in the same residue[5]                                     |
| PY_fa_rep                             | Lennard-jones repulsive [5]                                                                      |
| PY_hbond_bb_sc                        | H-bond energy sidechain-backbone[5]                                                              |
| PY_hbond_sc                           | H-bond energy sidechain-sidechain [5]                                                            |
| PY_pro_close                          | Proline ring closure energy[5]                                                                   |
| FX1_int_BackHbond                     | Fold-X energy term [6]                                                                           |
| FX1_int_SideHbond                     | Fold-X energy term [6]                                                                           |
| FX1_int_Energy_VdW                    | Fold-X energy term [6]                                                                           |
| FX1_int_Electro                       | Fold-X energy term [6]                                                                           |
| FX1_int_Energy_SolvP                  | Fold-X energy term[6]                                                                            |
| FX1_int_Energy_SolvH                  | Fold-X energy term[6]                                                                            |
| FX1_int_Energy_vdwclash               | Fold-X energy term[6]                                                                            |
| FX1_int_energy_torsion                | Fold-X energy term[6]                                                                            |
| FX1_int_backbone_vdwclash             | Fold-X energy term[6]                                                                            |
| FX1_int_Entropy_sidec                 | Fold-X energy term[6]                                                                            |
| FX1_int_Entropy_mainc                 | Fold-X energy term[6]                                                                            |
| FX1_int_water bonds                   | Fold-X energy term[6]                                                                            |
| FX1_int_helix dipole                  | Fold-X energy term[6]                                                                            |
| FX1_int_loop_entropy                  | Fold-X energy term[6]                                                                            |
| FX1_int_cis_bond                      | Fold-X energy term[6]                                                                            |
| FX1_int_disulfide                     | Fold-X energy term[6]                                                                            |
| FX1_int_kn electrostatic              | Fold-X energy term[6]                                                                            |
| FX1_int_partial covalent interactions | Fold-X energy term[6]                                                                            |
| FX1_int_Energy_Ionisation             | Fold-X energy term[6]                                                                            |
| FX1_int_Entropy Complex               | Fold-X energy term[6]                                                                            |
| FX2_BackHbond                         | Fold-X energy term[6]                                                                            |
| FX2_SideHbond                         | Fold-X energy term[6]                                                                            |
| FX2_Energy_VdW                        | Fold-X energy term[6]                                                                            |
| FX2_Electro                           | Fold-X energy term[6]                                                                            |
| FX2_Energy_SolvP                      | Fold-X energy term[6]                                                                            |
| FX2_Energy_SolvH                      | Fold-X energy term[6]                                                                            |
| FX2_Energy_vdwclash                   | Fold-X energy term[6]                                                                            |
| FX2_energy_torsion                    | Fold-X energy term[6]                                                                            |
| FX2_backbone_vdwclash                 | Fold-X energy term[6]                                                                            |
| FX2_Entropy_sidec                     | Fold-X energy term[6]                                                                            |
| FX2_Entropy_mainc                     | Fold-X energy term[6]                                                                            |
| FX2_water bonds                       | Fold-X energy term[6]                                                                            |
| FX2_helix dipole                      | Fold-X energy term[6]                                                                            |
| FX2_loop_entropy                      | Fold-X energy term[6]                                                                            |
| FX2_cis_bond                          | Fold-X energy term[6]                                                                            |
| FX2_disulfide                         | Fold-X energy term[6]                                                                            |
| FX2_kn electrostatic                  | Fold-X energy term[6]                                                                            |
| FX2_partial covalent interactions     | Fold-X energy term[6]                                                                            |
| FX2_Energy_Ionisation                 | Fold-X energy term[6]                                                                            |
| FX2_Entropy Complex                   | Fold-X energy term[6]                                                                            |
| DFIRE                                 | Atom Based Statistical Potential [7]                                                             |
| CP_BFKV                               | Residue Level Statistical Potential [8]                                                          |
| CP_BL                                 | Residue Level Statistical Potential [9]                                                          |

## Supplementary Text S1: Molecular Descriptor Set

---

|            |                                                           |
|------------|-----------------------------------------------------------|
| CP_BT      | Residue Level Statistical Potential [10]                  |
| CP_GKS     | Residue Level Statistical Potential [11]                  |
| CP_HLPL    | Residue Level Statistical Potential [12]                  |
| CP_MJPL    | Residue Level Statistical Potential [12]                  |
| CP_MJ3h    | Residue Level Statistical Potential [13]                  |
| CP_MJ2h    | Residue Level Statistical Potential [14]                  |
| CP_MJ1     | Residue Level Statistical Potential [15]                  |
| CP_MJ2     | Residue Level Statistical Potential [14]                  |
| CP_MSBM    | Residue Level Statistical Potential [16]                  |
| CP_MS      | Residue Level Statistical Potential [17]                  |
| CP_Qa      | Residue Level Statistical Potential [18]                  |
| CP_Qm      | Residue Level Statistical Potential [18]                  |
| CP_Qp      | Residue Level Statistical Potential [18]                  |
| CP_RO      | Residue Level Statistical Potential [19]                  |
| CP_SKOb    | Residue Level Statistical Potential [20]                  |
| CP_SKOa    | Residue Level Statistical Potential [20]                  |
| CP_SJG     | Residue Level Statistical Potential [21]                  |
| CP_TD      | Residue Level Statistical Potential [22]                  |
| CP_TEI     | Residue Level Statistical Potential [23]                  |
| CP_TES     | Residue Level Statistical Potential [23]                  |
| CP_TS      | Residue Level Statistical Potential [24]                  |
| CP_VD      | Residue Level Statistical Potential                       |
| AP_DARS    | Statistical Potential [25]                                |
| AP_URS     | Statistical Potential [25]                                |
| AP_MPS     | Statistical Potential [25]                                |
| DDFIRE     | dDFIRE Statistical Potential [26]                         |
| AP_DOPE    | Standard Dope Potential [27]                              |
| AP_DOPE_HR | High-Resolution Dope Potential [27]                       |
| CP_RMFCEN1 | 6 bin distance-dependent centroid-centroid potential [28] |
| CP_RMFCEN2 | 7 bin distance-dependent centroid-centroid potential [28] |
| CP_RMFCA   | Alpha-Carbon Potential [29]                               |
| CP_SKOIP   | Statistical Intermolecular Contact Potential [30]         |
| CP_TB      | Docking Contact Potential [31]                            |
| CP_TSC     | 2-Bin Docking Potential [32]                              |
| AP_T1      | Two-step docking atomistic potential [32]                 |
| AP_T2      | Two-step docking atomistic potential [32]                 |

## References

1. Liu, S., et al., *A physical reference state unifies the structure-derived potential of mean force for protein folding and binding*. *Proteins*, 2004. **56**(1): p. 93-101.
2. Lu, M., A.D. Dousis, and J. Ma, *OPUS-PSP: an orientation-dependent statistical all-atom potential derived from side-chain packing*. *J Mol Biol*, 2008. **376**(1): p. 288-301.
3. Mitra, P. and D. Pal, *New measures for estimating surface complementarity and packing at protein-protein interfaces*. *FEBS Lett*, 2010. **584**(6): p. 1163-8.
4. Brooks, B.R., et al., *CHARMM: the biomolecular simulation program*. *J Comput Chem*, 2009. **30**(10): p. 1545-614.
5. Chaudhury, S., S. Lyskov, and J.J. Gray, *PyRosetta: a script-based interface for implementing molecular modeling algorithms using Rosetta*. *Bioinformatics*, 2010. **26**(5): p. 689-91.
6. Schymkowitz, J., et al., *The FoldX web server: an online force field*. *Nucleic Acids Res*, 2005. **33**(Web Server issue): p. W382-8.
7. Zhang, C., et al., *The dependence of all-atom statistical potentials on structural training database*. *Biophys J*, 2004. **86**(6): p. 3349-58.
8. Bastolla, U., et al., *How to guarantee optimal stability for most representative structures in the Protein Data Bank*. *Proteins*, 2001. **44**(2): p. 79-96.
9. Bryant, S.H. and C.E. Lawrence, *An empirical energy function for threading protein sequence through the folding motif*. *Proteins*, 1993. **16**(1): p. 92-112.

10. Betancourt, M.R. and D. Thirumalai, *Pair potentials for protein folding: choice of reference states and sensitivity of predicted native states to variations in the interaction schemes*. Protein Sci, 1999. **8**(2): p. 361-9.
11. Godzik, A., A. Kolinski, and J. Skolnick, *Are proteins ideal mixtures of amino acids? Analysis of energy parameter sets*. Protein Sci, 1995. **4**(10): p. 2107-17.
12. Park, B. and M. Levitt, *Energy functions that discriminate X-ray and near native folds from well-constructed decoys*. J Mol Biol, 1996. **258**(2): p. 367-92.
13. Miyazawa, S. and R.L. Jernigan, *Self-consistent estimation of inter-residue protein contact energies based on an equilibrium mixture approximation of residues*. Proteins, 1999. **34**(1): p. 49-68.
14. Miyazawa, S. and R.L. Jernigan, *Residue-residue potentials with a favorable contact pair term and an unfavorable high packing density term, for simulation and threading*. J Mol Biol, 1996. **256**(3): p. 623-44.
15. Miyazawa, S. and R.L. Jernigan, *Estimation of effective interresidue contact energies from protein crystal structures: quasi-chemical approximation*. Macromolecules, 1985. **18**(3): p. 534-552.
16. Simons, K.T., et al., *Assembly of protein tertiary structures from fragments with similar local sequences using simulated annealing and Bayesian scoring functions*. J Mol Biol, 1997. **268**(1): p. 209-25.
17. Mirny, L.A. and E.I. Shakhnovich, *How to derive a protein folding potential? A new approach to an old problem*. J Mol Biol, 1996. **264**(5): p. 1164-79.
18. Boniecki, M., et al., *Protein fragment reconstruction using various modeling techniques*. J Comput Aided Mol Des, 2003. **17**(11): p. 725-38.
19. Robson, B. and D.J. Osguthorpe, *Refined models for computer simulation of protein folding. Applications to the study of conserved secondary structure and flexible hinge points during the folding of pancreatic trypsin inhibitor*. J Mol Biol, 1979. **132**(1): p. 19-51.
20. Skolnick, J., A. Kolinski, and A. Ortiz, *Derivation of protein-specific pair potentials based on weak sequence fragment similarity*. Proteins, 2000. **38**(1): p. 3-16.
21. Skolnick, J., et al., *Derivation and testing of pair potentials for protein folding. When is the quasichemical approximation correct?* Protein Sci, 1997. **6**(3): p. 676-88.
22. Thomas, P.D. and K.A. Dill, *An iterative method for extracting energy-like quantities from protein structures*. Proc Natl Acad Sci U S A, 1996. **93**(21): p. 11628-33.
23. Tobi, D., et al., *On the design and analysis of protein folding potentials*. Proteins, 2000. **40**(1): p. 71-85.
24. Tanaka, S. and H.A. Scheraga, *Medium- and long-range interaction parameters between amino acids for predicting three-dimensional structures of proteins*. Macromolecules, 1976. **9**(6): p. 945-50.
25. Chuang, G.Y., et al., *DARS (Decoys As the Reference State) potentials for protein-protein docking*. Biophys J, 2008. **95**(9): p. 4217-27.
26. Yang, Y. and Y. Zhou, *Specific interactions for ab initio folding of protein terminal regions with secondary structures*. Proteins, 2008. **72**(2): p. 793-803.
27. Shen, M.Y. and A. Sali, *Statistical potential for assessment and prediction of protein structures*. Protein Sci, 2006. **15**(11): p. 2507-24.
28. Rajgaria, R., S.R. McAllister, and C.A. Floudas, *Distance dependent centroid to centroid force fields using high resolution decoys*. Proteins, 2008. **70**(3): p. 950-70.
29. Rajgaria, R., S.R. McAllister, and C.A. Floudas, *A novel high resolution Calpha--Calpha distance dependent force field based on a high quality decoy set*. Proteins, 2006. **65**(3): p. 726-41.
30. Lu, H., L. Lu, and J. Skolnick, *Development of unified statistical potentials describing protein-protein interactions*. Biophys J, 2003. **84**(3): p. 1895-901.

## **Supplementary Text S1: Molecular Descriptor Set**

---

31. Tobi, D. and I. Bahar, *Optimal design of protein docking potentials: efficiency and limitations*. Proteins, 2006. **62**(4): p. 970-81.
32. Tobi, D., *Designing coarse grained-and atom based-potentials for protein-protein docking*. BMC Struct Biol, 2010. **10**: p. 40.
