# Supplementary material for: Characterizing Changes in the Rate of Protein-Protein Dissociation upon Interface Mutation Using Hotspot Energy and Organization
Source: PubMed Central journal article supplement (PMC3764008; doi:10.1371/journal.pcbi.1003216), 2013-09-05
Supplement: pcbi.1003216.s013.pdf [file pcbi.1003216.s013.pdf]

Effects of Cross-Validation Routine

The results presented in the main text which use 20-fold cross validation for the generation of test predictions, are an estimate of predictive power given one already has some mutant information on the complex in question to train upon. This type of cross validation is not a valid estimate of the generalization ability on an unseen complex. Therefore, two additional cross-validation mechanisms were also applied; Leave-Complex-Out CV (LCO-CV), where all mutations of a complex are left out as a test set and Leave-Homology-Out CV (LHO-CV); a more stringent form of cross-validation which accounts for homology and interface similarity as suggested in [1, 2]. The PCCs of the test predictions with  $\Delta K_{off}$ , of the two CV routines, are shown in Figure S3.

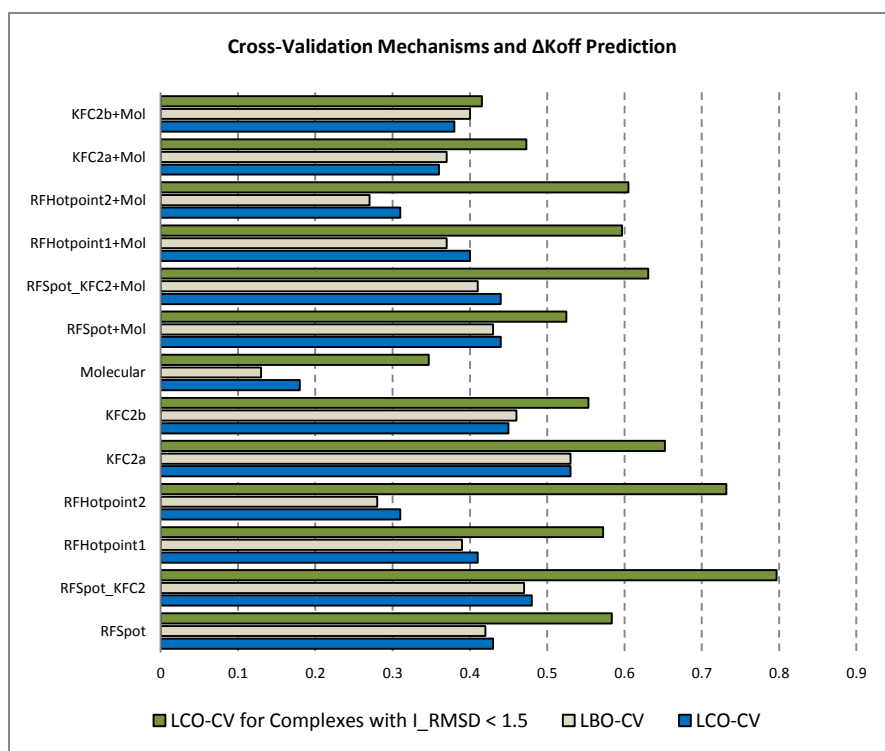

Figure S3. PCCs for Off-Rate Prediction Models with 713 off-rate mutant dataset from SKEMPI. Leave-Complex-Out CV(LCO-CV), Leave-Homology-Out CV (LHO-CV) and LCO-CV for complex which undergo minimal to no conformational changes with I\_RMSD < 1.5 Å as defined in [3]. The models differ by their features sets. First 6 use hotspot descriptor sets, followed by molecular descriptor set model (Molecular), and models which combine both (+Mol).

Keeping in mind that 20-Fold CV results for models are at  $R > 0.7$ , the LCO-CV and LHO-CV, the models severely over-fit. In essence, the predictive ability of the hotspot descriptors such as  $HSEner\_PosCoop_{RFSpot}$  ( $|R|=0.57$ ),  $Int\_HS\_Energy_{Hotpoint1}$  ( $|R|=0.57$ ) and  $SuppHSEner_{KFC2a}$  ( $|R|=0.62$ ) is being impeded by the learning model and noise from other features. It is important to note that the LHO-CV might not be well suited for certain practical purposes. For example, if one wishes to be able to predict mutations on an enzyme inhibitor complex, it would be natural to have such complexes in the training set, unlike what is actually done here in LHO-CV. The largest amount of over-fitting is observed for the molecular descriptor model, which is alleviated with the hotspot descriptor models and In both CV mechanisms, the correlations achieved by the hotspot descriptor models, is higher than that achieved by the molecular descriptor set model.



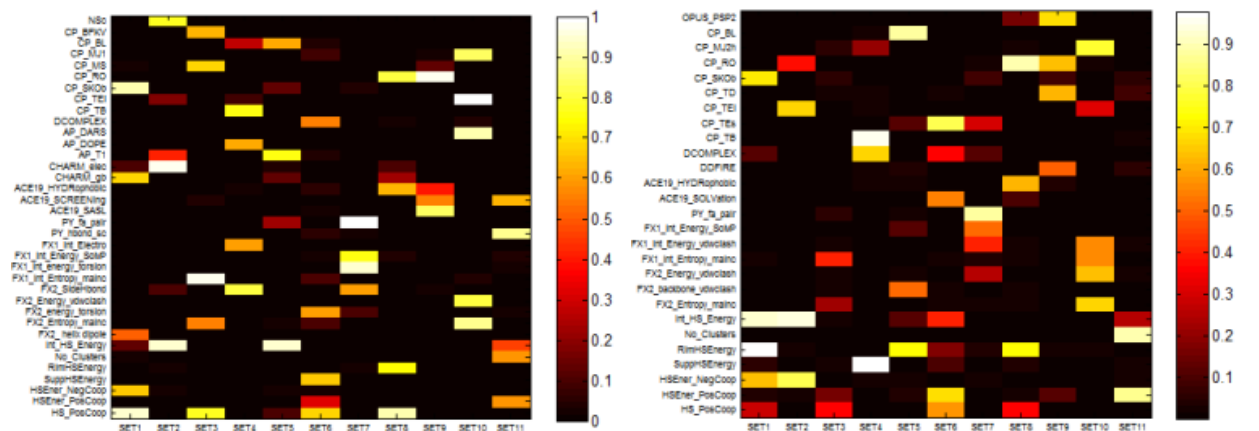

Figure S4 LEFT: GA-FS (LR), RIGHT: GA-FS (SVM). The colour bar indicates the percentage number of times the given feature made it to the feature set of the final model after a GA-FS run. Features shown are those which make it to the final model more than 50% of the time for at least one set on the x-axis.

References

1. Moal, I.H. and J. Fernandez-Recio, *SKEMPI: a Structural Kinetic and Energetic database of Mutant Protein Interactions and its use in empirical models*. *Bioinformatics*, 2012. **28**(20): p. 2600-7.
2. Kastritis, P.L. and A.M. Bonvin, *On the binding affinity of macromolecular interactions: daring to ask why proteins interact*. *J R Soc Interface*, 2013. **10**(79): p. 20120835.
3. Kastritis, P.L., et al., *A structure-based benchmark for protein-protein binding affinity*. *Protein Sci*, 2011. **20**(3): p. 482-91.
4. Kastritis, P.L. and A.M. Bonvin, *Are scoring functions in protein-protein docking ready to predict interactomes? Clues from a novel binding affinity benchmark*. *J Proteome Res*, 2010. **9**(5): p. 2216-25.
5. Moal, I.H., R. Agius, and P.A. Bates, *Protein-protein binding affinity prediction on a diverse set of structures*. *Bioinformatics*, 2011. **27**(21): p. 3002-9.
