# Supplementary material for: Characterizing Changes in the Rate of Protein-Protein Dissociation upon Interface Mutation Using Hotspot Energy and Organization
Source: PubMed Central journal article supplement (PMC3764008; doi:10.1371/journal.pcbi.1003216), 2013-09-05
Supplement: pcbi.1003216.s014.pdf [file pcbi.1003216.s014.pdf]

## Supplementary Text S4: Hotspot Predictor Predictions and Performance

All hotspot prediction algorithms and performance measures in this section are related to how well the hotspot predictors are able to detect  $\Delta\Delta G$ s of single-point alanine mutations which satisfy  $\Delta\Delta G > 2\text{kcal/mol}$  i.e. the prediction of hotspots. Though *RFSpot*, *RFSpot\_KFC2*, *KFC2a*, *KFC2b*, *RFHotpoint1* and *RFHotpoint2* are subsequently used for the generation of hotspot descriptors which are then used for the prediction of off-rate mutations, this supplementary section does not show any predictions or performance analysis for off-rate mutations. Table S10 summarizes each hotspot predictors analyzed. Table S16 shows the classification performance of each hotspot predictor on SKEMPI Alanine  $\Delta\Delta G$  Data. Note however that performance values for each predictor are not comparable as each predictor's performance is calculated on different subsets of mutations according to what was available or presented in their original works. Performance comparison on intersections of mutations, are however shown in Table S13 for *RFSpot* vs. other hotspot predictors (Table S12) and Table S14 for *RFSpot\_KFC2* vs. other hotspot predictors (Table S12). Table S15 shows the comparison between server predictions from *Hotpoint* with that of *RFhotpoint1* and *RFHotpoint2* on their intersection of predictions. Table S16 shows the list of predictions of every hotspot predictor considered on SKEMPI alanine data, for which predictions were available in the original work and for predictions on mutations which were not used in the model training in the case of servers (i.e *KFC2a*, *KFC2b* and *Hotpoint*).

Table S10. Hotspot Predictors Analyzed in this section.

| Hotspot Predictor     | Description and Source of Predictions                                                                                                                                                                                                                                                                                                                                                                                                                                                                                                                                             |
|-----------------------|-----------------------------------------------------------------------------------------------------------------------------------------------------------------------------------------------------------------------------------------------------------------------------------------------------------------------------------------------------------------------------------------------------------------------------------------------------------------------------------------------------------------------------------------------------------------------------------|
| <b>RFSpot</b>         | <b>RFSpot*</b> : Random Forest Model trained on SKEMPI alanine data, with molecular features.<br><b>RFSpot_KFC2*</b> : Random Forest Model trained on SKEMPI alanine data, with molecular features and features from KFC2a and KFC2b for which KFC2a and KFC2b Features from KFC2 server where available. Random Forest threshold adjusted to achieve same FPR of RFSpot for comparison.                                                                                                                                                                                          |
| <b>KFC2 [1]</b>       | <b>KFC2a_Orig</b> : uses predictions on ASEdB from [1]<br><b>KFC2b_Orig</b> : uses predictions on ASEdB from [1]<br><b>KFC2a*</b> : uses server predictions on SKEMPI alanine data which is not in ASEdB from KFC2 Server<br><b>KFC2b*</b> : uses server predictions on SKEMPI alanine data which is not in ASEdB from KFC2 Server                                                                                                                                                                                                                                                |
| <b>Robetta [2]</b>    | <b>Robetta</b> : uses predictions on ASEdB from [2]                                                                                                                                                                                                                                                                                                                                                                                                                                                                                                                               |
| <b>Hotpoint [3]</b>   | <b>Hotpoint_Orig</b> : uses predictions on ASEdB from [3]<br><b>Hotpoint</b> uses server prediction on SKEMPI alanine data which is not in ASEdB from Hotpoint Prediction Server<br><b>RFHotpoint1*</b> : Random Forest Model trained on SKEMPI alanine data, with original Hotpoint Features for which Hotpoint Features from Hotpoint server where available<br><b>RFHotpoint2*</b> : Random Forest Model trained on SKEMPI alanine data, with Hotpoint Features for which Hotpoint Features from server where available. Random Forest Threshold lowered to allow for more TPs |
| <b>RFMirror [4]</b>   | <b>RFMirror</b> : uses predictions on ASEdB from [4]                                                                                                                                                                                                                                                                                                                                                                                                                                                                                                                              |
| <b>SVM score [5]</b>  | <b>SVM score</b> : uses predictions on ASEdB from [5]                                                                                                                                                                                                                                                                                                                                                                                                                                                                                                                             |
| <b>TSVM score [5]</b> | <b>TSVM score</b> : uses predictions on ASEdB from [5]                                                                                                                                                                                                                                                                                                                                                                                                                                                                                                                            |

\* Indicate Hotspot Predictors used for the generation of hotspot descriptors and further analyzed in main manuscript for off-rate prediction.

Table S11. Performance of Hotspot Predictors on SKEMPI.

Performance of Hotspot Predictors on intersection of original data used in original hotspot predictors and SKEMPI. Predictors are ranked according to MCC.

| Predictor            | Intersection with SKEMPI | TPR   | FPR   | MCC   | F1    | Acc   | Spec  | Prec  |
|----------------------|--------------------------|-------|-------|-------|-------|-------|-------|-------|
| <b>TSVM score</b>    | <b>TSVM score</b>        | 0.673 | 0.136 | 0.508 | 0.619 | 0.823 | 0.864 | 0.574 |
| <b>RFSpot_KFC2*</b>  | <b>RFSpot_KFC2*</b>      | 0.490 | 0.083 | 0.452 | 0.560 | 0.814 | 0.917 | 0.652 |
| <b>SVM score</b>     | <b>SVM score</b>         | 0.615 | 0.152 | 0.438 | 0.566 | 0.798 | 0.848 | 0.525 |
| <b>RFMirror</b>      | <b>RFMirror</b>          | 0.500 | 0.094 | 0.434 | 0.545 | 0.816 | 0.906 | 0.600 |
| <b>KFC2a*</b>        | <b>KFC2a*</b>            | 0.734 | 0.279 | 0.402 | 0.568 | 0.724 | 0.721 | 0.463 |
| <b>KFC2b</b>         | <b>KFC2b</b>             | 0.452 | 0.103 | 0.383 | 0.509 | 0.789 | 0.897 | 0.583 |
| <b>Hotpoint_Orig</b> | <b>Hotpoint_Orig</b>     | 0.552 | 0.196 | 0.368 | 0.593 | 0.707 | 0.804 | 0.640 |
| <b>KFC2b*</b>        | <b>KFC2b*</b>            | 0.436 | 0.129 | 0.328 | 0.477 | 0.764 | 0.871 | 0.526 |
| <b>Robetta</b>       | <b>Robetta</b>           | 0.458 | 0.155 | 0.295 | 0.440 | 0.769 | 0.845 | 0.423 |
| <b>RFSpot*</b>       | <b>RFSpot*</b>           | 0.268 | 0.083 | 0.237 | 0.350 | 0.761 | 0.917 | 0.506 |
| <b>RFHotpoint1*</b>  | <b>RFHotpoint1*</b>      | 0.319 | 0.125 | 0.229 | 0.395 | 0.711 | 0.875 | 0.517 |
| <b>RFHotpoint2*</b>  | <b>RFHotpoint2*</b>      | 0.504 | 0.277 | 0.218 | 0.466 | 0.658 | 0.723 | 0.433 |
| <b>KFC2a_Orig</b>    | <b>KFC2a_Orig</b>        | 0.258 | 0.124 | 0.159 | 0.314 | 0.727 | 0.876 | 0.400 |
| <b>Hotpoint</b>      | <b>Hotpoint</b>          | 0.500 | 0.379 | 0.113 | 0.424 | 0.584 | 0.621 | 0.368 |

\* Indicate Hotspot Predictors used for the generation of hotspot descriptors and further analyzed in main manuscript for off-rate prediction.

## Supplementary Text S4: Hotspot Predictor Predictions and Performance

Table S12. Performance of Hotspot Predictors on SKEMPI.

Performance of Hotspot Predictors on intersection of original data used in original hotspot predictors and SKEMPI. Positioned for comparison with Table S13 and Table S14.

| Predictor     | Intersection with SKEMPI | TPR   | FPR   | MCC   | F1    | Acc   | Spec  | Prec  |
|---------------|--------------------------|-------|-------|-------|-------|-------|-------|-------|
| RFSpot_KFC2*  | RFSpot_KFC2*             | 0.490 | 0.083 | 0.452 | 0.560 | 0.814 | 0.917 | 0.652 |
| RFSpot*       | RFSpot*                  | 0.268 | 0.083 | 0.237 | 0.350 | 0.761 | 0.917 | 0.506 |
| KFC2a*        | KFC2a*                   | 0.734 | 0.279 | 0.402 | 0.568 | 0.724 | 0.721 | 0.463 |
| KFC2b*        | KFC2b*                   | 0.436 | 0.129 | 0.328 | 0.477 | 0.764 | 0.871 | 0.526 |
| Hotpoint      | Hotpoint                 | 0.500 | 0.379 | 0.113 | 0.424 | 0.584 | 0.621 | 0.368 |
| RFHotpoint1*  | RFHotpoint1*             | 0.319 | 0.125 | 0.229 | 0.395 | 0.711 | 0.875 | 0.517 |
| RFHotpoint2*  | RFHotpoint2*             | 0.504 | 0.277 | 0.218 | 0.466 | 0.658 | 0.723 | 0.433 |
| KFC2a_Orig    | KFC2a_Orig               | 0.258 | 0.124 | 0.159 | 0.314 | 0.727 | 0.876 | 0.400 |
| KFC2b_Orig    | KFC2b_Orig               | 0.452 | 0.103 | 0.383 | 0.509 | 0.789 | 0.897 | 0.583 |
| Robetta       | Robetta                  | 0.458 | 0.155 | 0.295 | 0.440 | 0.769 | 0.845 | 0.423 |
| Hotpoint_Orig | Hotpoint_Orig            | 0.552 | 0.196 | 0.368 | 0.593 | 0.707 | 0.804 | 0.640 |
| RFMirror      | RFMirror                 | 0.500 | 0.094 | 0.434 | 0.545 | 0.816 | 0.906 | 0.600 |
| SVM score     | SVM score                | 0.615 | 0.152 | 0.438 | 0.566 | 0.798 | 0.848 | 0.525 |
| TSVM score    | TSVM score               | 0.673 | 0.136 | 0.508 | 0.619 | 0.823 | 0.864 | 0.574 |

\* Indicate Hotspot Predictors used for the generation of hotspot descriptors and further analyzed in main manuscript for off-rate prediction.

Table S13. RFSpot and Hotspot Predictors.

Performance of RFSpot on intersection of original data used in original hotspot predictors and SKEMPI. Highlighted in Blue are instances where RFSpot performs better than respective hotspot predictor, as compared with values from Table S12.

| Predictor | Intersection with SKEMPI | TPR   | FPR   | MCC   | F1    | Acc   | Spec  | Prec  |
|-----------|--------------------------|-------|-------|-------|-------|-------|-------|-------|
| RFSpot    | RFSpot_KFC2*             | 0.268 | 0.083 | 0.237 | 0.350 | 0.761 | 0.917 | 0.506 |
| RFSpot    | RFSpot*                  | 0.268 | 0.083 | 0.237 | 0.350 | 0.761 | 0.917 | 0.506 |
| RFSpot    | KFC2a*                   | 0.255 | 0.080 | 0.230 | 0.340 | 0.756 | 0.920 | 0.511 |
| RFSpot    | KFC2b*                   | 0.255 | 0.080 | 0.230 | 0.340 | 0.756 | 0.920 | 0.511 |
| RFSpot    | Hotpoint                 | 0.279 | 0.118 | 0.199 | 0.361 | 0.698 | 0.882 | 0.511 |
| RFSpot    | RFHotpoint1*             | 0.291 | 0.110 | 0.223 | 0.374 | 0.713 | 0.890 | 0.526 |
| RFSpot    | RFHotpoint2*             | 0.291 | 0.110 | 0.223 | 0.374 | 0.713 | 0.890 | 0.526 |
| RFSpot    | KFC2a_Orig               | 0.323 | 0.072 | 0.316 | 0.417 | 0.781 | 0.928 | 0.588 |
| RFSpot    | KFC2b_Orig               | 0.323 | 0.072 | 0.316 | 0.417 | 0.781 | 0.928 | 0.588 |
| RFSpot    | Robetta                  | 0.417 | 0.062 | 0.418 | 0.500 | 0.835 | 0.938 | 0.625 |
| RFSpot    | Hotpoint_Orig            | 0.310 | 0.087 | 0.287 | 0.429 | 0.680 | 0.913 | 0.692 |
| RFSpot    | RFMirror                 | 0.296 | 0.079 | 0.272 | 0.376 | 0.784 | 0.921 | 0.516 |
| RFSpot    | SVM score                | 0.269 | 0.073 | 0.252 | 0.350 | 0.786 | 0.927 | 0.500 |
| RFSpot    | TSVM score               | 0.269 | 0.073 | 0.252 | 0.350 | 0.786 | 0.927 | 0.500 |

\* Indicate Hotspot Predictors used for the generation of hotspot descriptors and further analyzed in main manuscript for off-rate prediction.

Table S14. RFSpot\_KFC2 and Hotspot Predictors.

Performance of RFSpot\_KFC2 on intersection of original data used in original hotspot predictors and SKEMPI. Highlighted in Blue are instances where RFSpot\_KFC2 performs better than respective hotspot predictor, as compared with values from Table S12.

| Predictor   | Intersection with SKEMPI | TPR   | FPR   | MCC   | F1    | Acc   | Spec  | Prec  |
|-------------|--------------------------|-------|-------|-------|-------|-------|-------|-------|
| RFSpot_KFC2 | RFSpot_KFC2*             | 0.490 | 0.083 | 0.452 | 0.560 | 0.814 | 0.917 | 0.652 |
| RFSpot_KFC2 | RFSpot*                  | 0.490 | 0.083 | 0.452 | 0.560 | 0.814 | 0.917 | 0.652 |
| RFSpot_KFC2 | KFC2a*                   | 0.500 | 0.098 | 0.436 | 0.556 | 0.803 | 0.902 | 0.627 |
| RFSpot_KFC2 | KFC2b*                   | 0.500 | 0.098 | 0.436 | 0.556 | 0.803 | 0.902 | 0.627 |
| RFSpot_KFC2 | Hotpoint                 | 0.535 | 0.133 | 0.424 | 0.582 | 0.765 | 0.867 | 0.639 |
| RFSpot_KFC2 | RFHotpoint1*             | 0.511 | 0.113 | 0.431 | 0.574 | 0.776 | 0.887 | 0.655 |
| RFSpot_KFC2 | RFHotpoint2*             | 0.511 | 0.113 | 0.431 | 0.574 | 0.776 | 0.887 | 0.655 |
| RFSpot_KFC2 | KFC2a_Orig               | 0.452 | 0.082 | 0.419 | 0.528 | 0.805 | 0.918 | 0.636 |
| RFSpot_KFC2 | KFC2b_Orig               | 0.452 | 0.082 | 0.419 | 0.528 | 0.805 | 0.918 | 0.636 |
| RFSpot_KFC2 | Robetta                  | 0.583 | 0.052 | 0.583 | 0.651 | 0.876 | 0.948 | 0.737 |
| RFSpot_KFC2 | Hotpoint_Orig            | 0.483 | 0.087 | 0.451 | 0.596 | 0.747 | 0.913 | 0.778 |
| RFSpot_KFC2 | RFMirror                 | 0.500 | 0.063 | 0.495 | 0.581 | 0.841 | 0.937 | 0.692 |
| RFSpot_KFC2 | SVM score                | 0.519 | 0.068 | 0.499 | 0.587 | 0.844 | 0.932 | 0.675 |
| RFSpot_KFC2 | TSVM score               | 0.519 | 0.068 | 0.499 | 0.587 | 0.844 | 0.932 | 0.675 |

\* Indicate Hotspot Predictors used for the generation of hotspot descriptors and further analyzed in main manuscript for off-rate prediction.

Table S15. Performance comparison of RFHotpoint1 and RFHotpoint2 with server prediction of Hotpoint on SKEMP.

| Hotspot Predictor | TPR   | FPR   | MCC   | F1    | Acc   | Spec  | Prec  |
|-------------------|-------|-------|-------|-------|-------|-------|-------|
| Hotpoint          | 0.500 | 0.379 | 0.113 | 0.424 | 0.584 | 0.621 | 0.368 |
| RFHotpoint1       | 0.360 | 0.128 | 0.268 | 0.437 | 0.715 | 0.872 | 0.554 |
| RFHotpoint2       | 0.570 | 0.303 | 0.253 | 0.505 | 0.658 | 0.697 | 0.454 |

## Supplementary Text S4: Hotspot Predictor Predictions and Performance

Table S16. Hotspot predictor predictions on intersection with SKEMPI. 20-Fold CV results presented for hotspot predictors developed in this work: RFSpot, RFSpot\_KFC2, RFHotpoint1 and RFHotpoint2. Source of predictions and description of hotspot predictors listed in Table S10. Performance results for predictions listed in Tables S11-S14. 1: Hotspot, -1: Non-Hotspot, -: Prediction not available.

| PDB_MUT ID      | Truth | DDG    | RFSpot_KFC2* | RFSpot* | KFC2* | KFC2* | Hotpoint | RFHotpoint1* | RFHotpoint2* | KFC2a_Orig | KFC2b_Orig | Robetta | Hotpoint_Orig | RFMirror | SVM score | TSMV score |
|-----------------|-------|--------|--------------|---------|-------|-------|----------|--------------|--------------|------------|------------|---------|---------------|----------|-----------|------------|
| 1A22.pdb_AC182A | -1    | 1.010  | -1           | -1      | -1    | -1    | 1        | -1           | -1           | --         | --         | --      | --            | --       | --        | --         |
| 1A22.pdb_AD171A | -1    | 0.791  | -1           | -1      | --    | --    | --       | -1           | -1           | --         | --         | 1       | --            | 1        | 1         | 1          |
| 1A22.pdb_AE174A | -1    | -0.925 | -1           | -1      | --    | --    | --       | --           | --           | --         | --         | -1      | --            | -1       | -1        | -1         |
| 1A22.pdb_AE56A  | -1    | 0.411  | -1           | -1      | --    | --    | --       | -1           | -1           | --         | --         | -1      | --            | -1       | -1        | -1         |
| 1A22.pdb_AE65A  | -1    | -0.473 | -1           | -1      | --    | --    | --       | --           | --           | --         | --         | -1      | --            | -1       | -1        | -1         |
| 1A22.pdb_AF176A | -1    | 0.411  | -1           | -1      | --    | --    | --       | --           | --           | --         | --         | -1      | --            | 1        | -1        | -1         |
| 1A22.pdb_AF191A | -1    | 0.191  | -1           | -1      | -1    | -1    | --       | --           | --           | --         | --         | --      | --            | --       | --        | --         |
| 1A22.pdb_AF25A  | -1    | -0.447 | -1           | -1      | --    | --    | --       | --           | --           | --         | --         | -1      | --            | -1       | -1        | -1         |
| 1A22.pdb_AH18A  | -1    | -0.486 | -1           | -1      | --    | --    | --       | -1           | -1           | --         | --         | -1      | --            | -1       | -1        | -1         |
| 1A22.pdb_AH21A  | -1    | 0.155  | 1            | -1      | --    | --    | --       | 1            | 1            | --         | --         | -1      | --            | -1       | -1        | -1         |
| 1A22.pdb_AI179A | -1    | 0.806  | -1           | -1      | --    | --    | --       | 1            | 1            | --         | --         | -1      | --            | -1       | -1        | -1         |
| 1A22.pdb_AK168A | -1    | -0.155 | -1           | -1      | --    | --    | --       | 1            | 1            | --         | --         | 1       | --            | 1        | -1        | -1         |
| 1A22.pdb_AK172A | 1     | 2.015  | 1            | -1      | --    | --    | --       | -1           | -1           | --         | --         | -1      | --            | -1       | -1        | -1         |
| 1A22.pdb_AL45A  | -1    | 1.225  | -1           | -1      | --    | --    | --       | 1            | 1            | --         | --         | -1      | --            | 1        | -1        | -1         |
| 1A22.pdb_AN63A  | -1    | 0.314  | -1           | -1      | --    | --    | --       | --           | --           | --         | --         | -1      | --            | 1        | -1        | -1         |
| 1A22.pdb_AP48A  | -1    | 0.411  | -1           | -1      | -1    | -1    | -1       | -1           | -1           | --         | --         | --      | --            | --       | --        | --         |
| 1A22.pdb_AP61A  | -1    | 1.209  | -1           | -1      | -1    | -1    | --       | --           | --           | --         | --         | --      | --            | --       | --        | --         |
| 1A22.pdb_AQ22A  | -1    | -0.220 | -1           | -1      | --    | --    | --       | -1           | -1           | --         | --         | -1      | --            | -1       | -1        | -1         |
| 1A22.pdb_AQ46A  | -1    | 0.108  | -1           | -1      | --    | --    | --       | -1           | -1           | --         | --         | -1      | --            | -1       | -1        | -1         |
| 1A22.pdb_AQ68A  | -1    | 0.588  | -1           | -1      | --    | --    | --       | -1           | -1           | --         | --         | -1      | --            | -1       | -1        | -1         |
| 1A22.pdb_AR167A | -1    | 0.278  | -1           | -1      | --    | --    | --       | 1            | 1            | --         | --         | -1      | --            | -1       | -1        | -1         |
| 1A22.pdb_AR178A | 1     | 2.426  | 1            | -1      | --    | --    | --       | --           | -1           | --         | --         | -1      | --            | -1       | -1        | -1         |
| 1A22.pdb_AR183A | -1    | 0.543  | -1           | -1      | --    | --    | --       | --           | --           | --         | --         | -1      | --            | -1       | --        | --         |
| 1A22.pdb_AR64A  | -1    | 1.643  | 1            | 1       | --    | --    | --       | -1           | -1           | --         | --         | 1       | --            | -1       | 1         | 1          |
| 1A22.pdb_AS51A  | -1    | -0.348 | -1           | -1      | --    | --    | --       | --           | --           | --         | --         | -1      | --            | 1        | -1        | -1         |
| 1A22.pdb_AS62A  | -1    | 0.155  | -1           | -1      | --    | --    | --       | 1            | 1            | --         | --         | -1      | --            | -1       | -1        | -1         |
| 1A22.pdb_AT175A | -1    | 1.907  | -1           | -1      | --    | --    | --       | -1           | 1            | --         | --         | 1       | --            | 1        | 1         | -1         |
| 1A22.pdb_AY164A | -1    | 0.348  | -1           | -1      | --    | --    | --       | -1           | -1           | --         | --         | -1      | --            | -1       | -1        | -1         |
| 1A22.pdb_AY42A  | -1    | 0.199  | -1           | -1      | --    | --    | --       | -1           | -1           | --         | --         | 1       | --            | -1       | -1        | -1         |
| 1A22.pdb_BC308A | -1    | 0.000  | -1           | -1      | -1    | -1    | 1        | 1            | 1            | --         | --         | --      | --            | --       | --        | --         |
| 1A22.pdb_BC322A | -1    | 0.000  | -1           | -1      | 1     | -1    | 1        | -1           | 1            | --         | --         | --      | --            | --       | --        | --         |
| 1A22.pdb_BD326A | -1    | 0.994  | -1           | -1      | --    | --    | --       | --           | --           | --         | --         | --      | --            | -1       | -1        | -1         |
| 1A22.pdb_BD364A | -1    | 1.487  | -1           | -1      | --    | --    | --       | -1           | -1           | --         | --         | --      | --            | -1       | -1        | 1          |
| 1A22.pdb_BE244A | -1    | 1.693  | -1           | -1      | --    | --    | --       | -1           | -1           | --         | --         | --      | --            | -1       | -1        | -1         |
| 1A22.pdb_BE275A | -1    | -0.094 | -1           | -1      | --    | --    | --       | -1           | -1           | --         | --         | --      | --            | -1       | -1        | -1         |
| 1A22.pdb_BE320A | -1    | -0.182 | -1           | -1      | --    | --    | --       | -1           | -1           | --         | --         | --      | --            | -1       | -1        | -1         |
| 1A22.pdb_BE327A | -1    | 0.971  | -1           | -1      | --    | --    | --       | -1           | 1            | --         | --         | --      | --            | -1       | -1        | -1         |
| 1A22.pdb_BI303A | -1    | 1.608  | -1           | -1      | --    | --    | --       | --           | -1           | --         | --         | --      | --            | -1       | -1        | -1         |
| 1A22.pdb_BI305A | -1    | 1.942  | -1           | -1      | --    | --    | --       | --           | --           | --         | --         | --      | --            | -1       | -1        | -1         |
| 1A22.pdb_BI365A | 1     | 2.131  | -1           | -1      | --    | --    | --       | -1           | -1           | --         | --         | --      | --            | -1       | -1        | -1         |
| 1A22.pdb_BK310A | -1    | 0.043  | -1           | -1      | -1    | -1    | --       | --           | --           | --         | --         | --      | --            | --       | --        | --         |
| 1A22.pdb_BK321A | -1    | 0.081  | -1           | -1      | --    | --    | --       | --           | --           | --         | --         | --      | --            | -1       | -1        | -1         |
| 1A22.pdb_BK367A | -1    | -0.018 | -1           | -1      | --    | --    | --       | -1           | -1           | --         | --         | --      | --            | -1       | -1        | -1         |
| 1A22.pdb_BK415A | -1    | 0.785  | -1           | -1      | -1    | -1    | --       | --           | --           | --         | --         | --      | --            | --       | --        | --         |
| 1A22.pdb_BN418A | -1    | 0.296  | -1           | -1      | --    | --    | --       | 1            | 1            | --         | --         | --      | --            | -1       | 1         | -1         |
| 1A22.pdb_BP306A | 1     | 3.306  | -1           | -1      | 1     | -1    | -1       | 1            | 1            | --         | --         | --      | --            | --       | --        | --         |
| 1A22.pdb_BQ274A | -1    | 0.000  | -1           | -1      | --    | --    | --       | -1           | -1           | --         | --         | --      | --            | -1       | -1        | -1         |
| 1A22.pdb_BQ366A | -1    | 0.017  | -1           | -1      | --    | --    | --       | --           | -1           | --         | --         | --      | --            | -1       | -1        | -1         |
| 1A22.pdb_BQ416A | -1    | 0.891  | -1           | -1      | --    | --    | --       | --           | --           | --         | --         | --      | --            | -1       | --        | --         |
| 1A22.pdb_BR243A | 1     | 2.116  | 1            | -1      | --    | --    | --       | -1           | -1           | --         | --         | --      | --            | 1        | 1         | 1          |
| 1A22.pdb_BR271A | -1    | 0.536  | -1           | -1      | --    | --    | --       | --           | 1            | --         | --         | --      | --            | 1        | -1        | -1         |
| 1A22.pdb_BR417A | -1    | 0.274  | -1           | -1      | --    | --    | --       | -1           | -1           | --         | --         | --      | --            | -1       | -1        | -1         |
| 1A22.pdb_BS298A | -1    | -0.055 | -1           | -1      | --    | --    | --       | --           | --           | --         | --         | --      | --            | -1       | -1        | -1         |
| 1A22.pdb_BS302A | -1    | -0.182 | -1           | -1      | --    | --    | --       | --           | --           | --         | --         | --      | --            | -1       | -1        | -1         |
| 1A22.pdb_BS324A | -1    | 0.274  | -1           | -1      | --    | --    | --       | --           | --           | --         | --         | --      | --            | -1       | -1        | -1         |
| 1A22.pdb_BS419A | -1    | 0.034  | -1           | -1      | --    | --    | --       | -1           | -1           | --         | --         | --      | --            | -1       | -1        | -1         |
| 1A22.pdb_BT301A | -1    | 1.762  | -1           | -1      | -1    | -1    | --       | --           | --           | --         | --         | --      | --            | --       | -1        | -1         |
| 1A22.pdb_BT395A | -1    | -0.094 | -1           | -1      | -1    | -1    | --       | --           | --           | --         | --         | --      | --            | --       | --        | --         |
| 1A22.pdb_BV371A | -1    | -0.617 | -1           | -1      | --    | --    | --       | -1           | -1           | --         | --         | --      | --            | -1       | -1        | -1         |
| 1A22.pdb_BW276A | -1    | 0.514  | 1            | 1       | --    | --    | --       | -1           | -1           | --         | --         | --      | --            | 1        | -1        | -1         |
| 1A22.pdb_BW280A | -1    | -0.018 | -1           | -1      | --    | --    | --       | --           | --           | --         | --         | --      | --            | -1       | --        | --         |
| 1A4Y.pdb_AD435A | 1     | 3.486  | -1           | 1       | --    | --    | --       | -1           | -1           | -1         | 1          | -1      | -1            | 1        | 1         | 1          |
| 1A4Y.pdb_AE344A | -1    | 0.179  | -1           | -1      | --    | --    | --       | -1           | -1           | -1         | -1         | -1      | 1             | -1       | -1        | -1         |
| 1A4Y.pdb_AE401A | -1    | 0.884  | -1           | -1      | --    | --    | --       | --           | -1           | -1         | -1         | -1      | --            | -1       | -1        | -1         |
| 1A4Y.pdb_AI459A | -1    | 0.679  | -1           | -1      | --    | --    | --       | -1           | -1           | -1         | -1         | -1      | --            | -1       | -1        | -1         |
| 1A4Y.pdb_AK320A | -1    | -0.310 | -1           | -1      | --    | --    | --       | -1           | -1           | -1         | -1         | -1      | -1            | -1       | -1        | -1         |
| 1A4Y.pdb_AS289A | -1    | 0.042  | -1           | -1      | --    | --    | --       | 1            | 1            | -1         | -1         | -1      | -1            | -1       | -1        | -1         |
| 1A4Y.pdb_AW261A | -1    | 0.101  | -1           | -1      | --    | --    | --       | --           | --           | -1         | -1         | -1      | -1            | -1       | -1        | -1         |
| 1A4Y.pdb_AW263A | -1    | 1.171  | -1           | 1       | --    | --    | --       | -1           | 1            | -1         | -1         | 1       | --            | -1       | -1        | -1         |
| 1A4Y.pdb_AW318A | -1    | 1.501  | -1           | -1      | --    | --    | --       | 1            | 1            | -1         | -1         | 1       | --            | -1       | -1        | -1         |
| 1A4Y.pdb_AW375A | -1    | 1.035  | -1           | -1      | --    | --    | --       | 1            | 1            | -1         | -1         | 1       | --            | 1        | -1        | -1         |
| 1A4Y.pdb_AY434A | 1     | 3.262  | -1           | 1       | --    | --    | --       | -1           | 1            | -1         | -1         | 1       | 1             | 1        | 1         | 1          |

## Supplementary Text S4: Hotspot Predictor Predictions and Performance

|                 |    |        |    |    |    |    |    |    |    |    |    |    |    |    |    |    |
|-----------------|----|--------|----|----|----|----|----|----|----|----|----|----|----|----|----|----|
| 1A4Y.pdb_AY437A | -1 | 0.836  | 1  | 1  | -- | -- | -- | -1 | -1 | -1 | -1 | 1  | -- | -1 | 1  | 1  |
| 1A4Y.pdb_BE108A | -1 | -0.323 | -1 | -1 | -- | -- | -- | -1 | -1 | -1 | -1 | -1 | -1 | -1 | -1 | -1 |
| 1A4Y.pdb_BH114A | -1 | 0.657  | -1 | -1 | -- | -- | -- | 1  | 1  | -1 | -1 | -1 | -- | -1 | -1 | -1 |
| 1A4Y.pdb_BH13A  | -1 | -0.297 | -1 | -1 | -- | -- | -- | -- | -- | -- | -- | -1 | -- | -1 | -1 | -1 |
| 1A4Y.pdb_BH84A  | -1 | 0.170  | -1 | -1 | -- | -- | -- | -- | -- | -1 | -1 | -1 | 1  | -1 | -1 | -1 |
| 1A4Y.pdb_BH8A   | -1 | 0.904  | -1 | -1 | -- | -- | -- | -1 | -1 | -1 | -1 | -1 | -- | -1 | -1 | -1 |
| 1A4Y.pdb_BN68A  | -1 | 0.118  | -1 | -1 | -- | -- | -- | -1 | -1 | -1 | -1 | -1 | -1 | -1 | -1 | -1 |
| 1A4Y.pdb_BQ12A  | -1 | 0.300  | -1 | -1 | -- | -- | -- | -1 | -1 | -1 | -1 | -1 | 1  | -1 | -1 | -1 |
| 1A4Y.pdb_BR31A  | -1 | 0.251  | -1 | -1 | -- | -- | -- | -1 | -1 | -1 | -1 | 1  | -1 | -1 | -1 | -1 |
| 1A4Y.pdb_BR32A  | -1 | 0.910  | -1 | -1 | -- | -- | -- | -1 | -1 | -1 | -1 | -1 | -- | -1 | -1 | -1 |
| 1A4Y.pdb_BR5A   | 1  | 2.309  | 1  | -1 | -- | -- | -- | -- | -- | -1 | -1 | 1  | 1  | -1 | 1  | 1  |
| 1A4Y.pdb_BW89A  | -1 | 0.240  | -1 | -1 | -- | -- | -- | -1 | -1 | -1 | -1 | 1  | -1 | -1 | -1 | 1  |
| 1AHW.pdb_CL176A | -1 | 0.987  | -1 | -1 | -- | -- | -- | -- | -- | -- | -- | -1 | -- | -1 | -- | -- |
| 1AHW.pdb_CT167A | -1 | -0.074 | -1 | -1 | -- | -- | -- | -1 | -1 | -1 | -1 | -1 | -1 | -1 | 1  | 1  |
| 1AHW.pdb_CT170A | -1 | 1.106  | -1 | -1 | -- | -- | -- | -1 | -1 | -1 | -1 | -1 | -- | -1 | -1 | -1 |
| 1AHW.pdb_CT197A | -1 | 1.346  | -1 | -1 | -- | -- | -- | -- | -- | -- | -- | -1 | -- | -1 | -1 | -1 |
| 1AHW.pdb_CV198A | -1 | -0.314 | -1 | -1 | -- | -- | -- | -1 | -1 | -1 | -1 | -1 | -1 | -1 | -1 | -1 |
| 1AHW.pdb_CY157A | -1 | -1.890 | -1 | -1 | -1 | -1 | -1 | -- | -- | -- | -- | -- | -- | -- | -- | -- |
| 1AK4.pdb_DG489A | 1  | 3.442  | -1 | -1 | -1 | -1 | 1  | -1 | -1 | -- | -- | -- | -- | -- | -- | -- |
| 1AK4.pdb_DH487A | 1  | 2.374  | -1 | -1 | -1 | -1 | -1 | -1 | -1 | -- | -- | -- | -- | -- | -- | -- |
| 1AK4.pdb_DI491A | -1 | 1.604  | 1  | -1 | -1 | -1 | -1 | -1 | -1 | -- | -- | -- | -- | -- | -- | -- |
| 1AK4.pdb_DP485A | 1  | 2.450  | -1 | -1 | -1 | -1 | -1 | -1 | -1 | -- | -- | -- | -- | -- | -- | -- |
| 1AK4.pdb_DP490A | 1  | 3.537  | -1 | -1 | 1  | -1 | 1  | 1  | 1  | -- | -- | -- | -- | -- | -- | -- |
| 1AK4.pdb_DP493A | 1  | 2.047  | -1 | -1 | -1 | -1 | -1 | -1 | -1 | -- | -- | -- | -- | -- | -- | -- |
| 1AK4.pdb_DV486A | 1  | 2.356  | -1 | -1 | -1 | -1 | -1 | -- | -- | -- | -- | -- | -- | -- | -- | -- |
| 1BRS.pdb_AE60A  | -1 | -0.326 | -1 | -1 | -- | -- | -- | -1 | 1  | -1 | 1  | -1 | -1 | -1 | 1  | 1  |
| 1BRS.pdb_AE73A  | 1  | 2.348  | -1 | -1 | -- | -- | -- | -- | -- | -- | -1 | -- | -- | -1 | -1 | -1 |
| 1BRS.pdb_AH102A | 1  | 6.146  | -1 | 1  | -- | -- | -- | 1  | 1  | -1 | -1 | 1  | 1  | 1  | 1  | 1  |
| 1BRS.pdb_AK27A  | 1  | 5.381  | 1  | -1 | -- | -- | -- | -1 | 1  | -1 | -1 | -1 | -1 | -1 | -1 | 1  |
| 1BRS.pdb_AN58A  | 1  | 3.066  | -1 | -1 | -- | -- | -- | -1 | -1 | -1 | -1 | -1 | -1 | -1 | -1 | -1 |
| 1BRS.pdb_AR59A  | 1  | 5.245  | 1  | 1  | -- | -- | -- | -1 | -1 | -1 | -1 | 1  | -1 | 1  | 1  | 1  |
| 1BRS.pdb_AR87A  | 1  | 5.565  | 1  | -1 | -- | -- | -- | -- | -- | -1 | 1  | 1  | 1  | -1 | 1  | 1  |
| 1BRS.pdb_DD35A  | 1  | 4.503  | -1 | -1 | -- | -- | -- | 1  | 1  | 1  | 1  | -1 | 1  | 1  | 1  | 1  |
| 1BRS.pdb_DD39A  | 1  | 7.651  | -1 | 1  | -- | -- | -- | -1 | -1 | -1 | -1 | 1  | 1  | 1  | 1  | 1  |
| 1BRS.pdb_DE76A  | -1 | 1.364  | -1 | -1 | -- | -- | -- | -1 | -1 | -1 | -1 | -1 | -1 | -1 | -1 | -1 |
| 1BRS.pdb_DE80A  | -1 | 0.543  | -1 | -1 | -1 | -1 | -- | -- | -- | -- | -- | -1 | -- | -- | -- | -- |
| 1BRS.pdb_DT42A  | -1 | 1.858  | -1 | -1 | -- | -- | -- | -1 | -1 | -1 | -1 | -1 | -1 | -1 | 1  | 1  |
| 1BRS.pdb_DY29A  | 1  | 3.471  | 1  | 1  | -- | -- | -- | -1 | -1 | 1  | -1 | 1  | -1 | -1 | 1  | 1  |
| 1CBW.pdb_IG12A  | -1 | 0.686  | -1 | -1 | -1 | -1 | -- | -- | -- | -- | -- | -- | -- | -- | -- | -- |
| 1CBW.pdb_IG36A  | -1 | 0.964  | -1 | -1 | -1 | -1 | 1  | 1  | 1  | -- | -- | -- | -- | -- | -- | -- |
| 1CBW.pdb_IG37A  | -1 | 0.821  | -1 | -1 | -1 | -1 | 1  | 1  | -1 | -- | -- | -- | -- | -- | -- | -- |
| 1CBW.pdb_II18A  | -1 | 1.416  | -1 | -1 | -1 | -1 | -- | -- | -- | -- | -- | -- | -- | -- | -- | -- |
| 1CBW.pdb_II19A  | -1 | 0.143  | -1 | -1 | -1 | -1 | -1 | -1 | -1 | -- | -- | -- | -- | -- | -- | -- |
| 1CBW.pdb_IK15A  | 1  | 2.015  | 1  | 1  | 1  | 1  | -1 | 1  | -- | -- | -- | -- | -- | -- | -- | -- |
| 1CBW.pdb_IP13A  | -1 | -0.056 | -1 | -1 | -1 | -1 | -1 | -1 | -- | -- | -- | -- | -- | -- | -- | -- |
| 1CBW.pdb_IR17A  | -1 | 0.554  | 1  | -1 | 1  | 1  | -1 | 1  | 1  | -- | -- | -- | -- | -- | -- | -- |
| 1CBW.pdb_IR39A  | -1 | 0.222  | -1 | -1 | -1 | -1 | -1 | 1  | -- | -- | -- | -- | -- | -- | -- | -- |
| 1CBW.pdb_IT11A  | -1 | 0.222  | -1 | -1 | -1 | -1 | -- | -- | -- | -- | -- | -- | -- | -- | -- | -- |
| 1CBW.pdb_IV34A  | -1 | 0.052  | -1 | -1 | -1 | -1 | -- | -- | -- | -- | -- | -- | -- | -- | -- | -- |
| 1CHO.pdb_IE19A  | 1  | 2.333  | -1 | -1 | 1  | -1 | -1 | -1 | -1 | -- | -- | -- | -- | -- | -- | -- |
| 1CHO.pdb_IG32A  | -1 | -1.092 | -1 | -1 | -1 | -1 | -- | -- | -- | -- | -- | -- | -- | -- | -- | -- |
| 1CHO.pdb_IK13A  | -1 | 0.181  | -1 | -1 | -1 | -1 | -- | -- | -- | -- | -- | -- | -- | -- | -- | -- |
| 1CHO.pdb_IL18A  | 1  | 4.766  | 1  | 1  | 1  | 1  | 1  | 1  | -- | -- | -- | -- | -- | -- | -- | -- |
| 1CHO.pdb_IN36A  | -1 | -1.364 | -1 | -1 | -1 | -1 | -1 | -1 | -- | -- | -- | -- | -- | -- | -- | -- |
| 1CHO.pdb_IP14A  | -1 | 0.381  | -1 | -1 | -1 | -1 | -1 | -1 | -1 | -- | -- | -- | -- | -- | -- | -- |
| 1CHO.pdb_IR21A  | 1  | 3.192  | -1 | -1 | -1 | -1 | -1 | -1 | -1 | -- | -- | -- | -- | -- | -- | -- |
| 1CHO.pdb_IT17A  | 1  | 4.159  | -1 | -1 | 1  | -1 | -1 | 1  | -- | -- | -- | -- | -- | -- | -- | -- |
| 1CHO.pdb_IY20A  | 1  | 2.543  | 1  | 1  | 1  | 1  | 1  | 1  | -- | -- | -- | -- | -- | -- | -- | -- |
| 1DAN.pdb_HM175A | -1 | 0.744  | -1 | -1 | 1  | 1  | 1  | 1  | 1  | -- | -- | -- | -- | -- | -- | -- |
| 1DAN.pdb_TD44A  | -1 | 1.380  | -1 | -1 | -- | -- | -- | 1  | -1 | -1 | -1 | -- | -1 | 1  | -1 | -1 |
| 1DAN.pdb_TD58A  | -1 | 1.989  | -1 | -1 | -- | -- | -- | -1 | -1 | 1  | -1 | -- | -1 | -1 | 1  | 1  |
| 1DAN.pdb_TD61A  | -1 | 0.242  | -1 | 1  | -- | -- | -- | -- | 1  | -1 | -1 | -- | -1 | -1 | -1 | -1 |
| 1DAN.pdb_TE24A  | -1 | 0.658  | -1 | -1 | -- | -- | -- | -1 | -1 | -1 | -1 | -- | -1 | -1 | -1 | -1 |
| 1DAN.pdb_TF50A  | -1 | 0.438  | -1 | -1 | -- | -- | -- | 1  | 1  | -1 | -1 | -- | -- | -1 | -1 | -1 |
| 1DAN.pdb_TF76A  | -1 | 1.105  | -1 | -1 | -- | -- | -- | -1 | -1 | -1 | -1 | -- | -- | -1 | -1 | -1 |
| 1DAN.pdb_TG43A  | -1 | 0.065  | -1 | -1 | -1 | -1 | -1 | -1 | -1 | -- | -- | -- | -- | -- | -- | -- |
| 1DAN.pdb_TI22A  | -1 | 0.645  | -1 | -1 | -- | -- | -- | -1 | -1 | -1 | 1  | -- | -- | -1 | -1 | -1 |
| 1DAN.pdb_TK15A  | -1 | -0.397 | -1 | -1 | -- | -- | -- | -- | -- | -- | -- | -- | -- | -1 | -- | -- |
| 1DAN.pdb_TK20A  | 1  | 2.439  | 1  | -1 | -- | -- | -- | -1 | -1 | 1  | -1 | -- | -1 | -1 | 1  | 1  |
| 1DAN.pdb_TK41A  | -1 | 0.322  | -1 | -1 | -- | -- | -- | -- | -- | -1 | -1 | -- | -1 | -1 | -1 | -1 |
| 1DAN.pdb_TK46A  | -1 | 0.895  | -1 | -1 | -- | -- | -- | -1 | -1 | -- | -- | -- | -- | -1 | -1 | -1 |
| 1DAN.pdb_TK48A  | -1 | 0.921  | -1 | -1 | -- | -- | -- | -- | -- | -1 | -1 | -- | -- | -1 | -1 | -1 |
| 1DAN.pdb_TN18A  | -1 | 0.180  | -1 | -1 | -- | -- | -- | -1 | -1 | -- | -- | -- | -- | -1 | -1 | -1 |
| 1DAN.pdb_TQ37A  | -1 | 0.729  | -1 | -1 | -- | -- | -- | -1 | -1 | 1  | 1  | -- | -- | -1 | -1 | -1 |
| 1DAN.pdb_TS42A  | -1 | -0.069 | -1 | -1 | -- | -- | -- | -- | -- | -1 | -1 | -- | -1 | -1 | -1 | -1 |
| 1DAN.pdb_TS47A  | -1 | -0.127 | -1 | -1 | -- | -- | -- | 1  | 1  | -1 | -1 | -- | -1 | -1 | -1 | -1 |
| 1DAN.pdb_TT17A  | -1 | 0.121  | -1 | -1 | -- | -- | -- | -1 | -1 | 1  | -1 | -- | -1 | -1 | -1 | -1 |
| 1DAN.pdb_TW45A  | -1 | 1.500  | -1 | -1 | -- | -- | -- | -1 | 1  | -1 | 1  | -- | -- | 1  | -1 | -1 |



## Supplementary Text S4: Hotspot Predictor Predictions and Performance

|                 |    |        |    |    |    |    |    |    |    |    |    |    |    |    |    |    |
|-----------------|----|--------|----|----|----|----|----|----|----|----|----|----|----|----|----|----|
| 1EMV.pdb_AH46A  | -1 | 0.832  | -1 | -1 | -1 | -1 | -- | -- | -- | -- | -- | -- | -- | -- | -- | -- |
| 1EMV.pdb_AI53A  | -1 | 0.848  | -1 | -1 | 1  | 1  | 1  | -1 | -1 | -- | -- | -- | -- | -- | -- | -- |
| 1EMV.pdb_AL33A  | 1  | 3.419  | 1  | -1 | 1  | 1  | 1  | -1 | -1 | -- | -- | -- | -- | -- | -- | -- |
| 1EMV.pdb_AN24A  | -1 | 0.139  | -1 | -1 | -1 | -1 | -- | -- | -- | -- | -- | -- | -- | -- | -- | -- |
| 1EMV.pdb_AP47A  | -1 | 0.437  | -1 | -1 | -1 | -1 | -1 | -1 | -1 | -- | -- | -- | -- | -- | -- | -- |
| 1EMV.pdb_AP56A  | -1 | 1.243  | -1 | -1 | -1 | -1 | -- | -- | -- | -- | -- | -- | -- | -- | -- | -- |
| 1EMV.pdb_AS28A  | -1 | 0.173  | -1 | -1 | -1 | -1 | -- | -- | -- | -- | -- | -- | -- | -- | -- | -- |
| 1EMV.pdb_AS29A  | -1 | 0.956  | -1 | -1 | -1 | -1 | -1 | -1 | -1 | -- | -- | -- | -- | -- | -- | -- |
| 1EMV.pdb_AS48A  | -1 | 0.007  | -1 | -1 | -1 | -1 | -1 | -1 | -1 | -- | -- | -- | -- | -- | -- | -- |
| 1EMV.pdb_AS50A  | 1  | 2.188  | -1 | -1 | 1  | -1 | 1  | 1  | 1  | -- | -- | -- | -- | -- | -- | -- |
| 1EMV.pdb_AT27A  | -1 | 0.728  | -1 | -1 | -1 | -1 | -- | -- | -- | -- | -- | -- | -- | -- | -- | -- |
| 1EMV.pdb_AT38A  | -1 | 0.900  | -1 | -1 | -1 | -1 | -- | -- | -- | -- | -- | -- | -- | -- | -- | -- |
| 1EMV.pdb_AV34A  | 1  | 2.579  | 1  | -1 | 1  | -1 | 1  | 1  | 1  | -- | -- | -- | -- | -- | -- | -- |
| 1EMV.pdb_AV37A  | -1 | 1.665  | -1 | -1 | 1  | -1 | 1  | 1  | 1  | -- | -- | -- | -- | -- | -- | -- |
| 1EMV.pdb_AY54A  | 1  | 4.837  | 1  | 1  | 1  | 1  | 1  | 1  | 1  | -- | -- | -- | -- | -- | -- | -- |
| 1EMV.pdb_AY55A  | 1  | 4.637  | 1  | 1  | 1  | -1 | -1 | -1 | -1 | -- | -- | -- | -- | -- | -- | -- |
| 1EMV.pdb_BF86A  | 1  | 3.881  | 1  | 1  | 1  | 1  | 1  | 1  | 1  | -- | -- | -- | -- | -- | -- | -- |
| 1EMV.pdb_BK97A  | -1 | 1.961  | 1  | 1  | 1  | 1  | -1 | -1 | -1 | -- | -- | -- | -- | -- | -- | -- |
| 1EMV.pdb_BN72A  | -1 | 1.165  | -1 | -1 | 1  | -1 | -1 | -1 | -1 | -- | -- | -- | -- | -- | -- | -- |
| 1EMV.pdb_BN75A  | 1  | 2.336  | 1  | -1 | 1  | 1  | -1 | -1 | -1 | -- | -- | -- | -- | -- | -- | -- |
| 1EMV.pdb_BQ92A  | -1 | -0.278 | -1 | -1 | -1 | -1 | 1  | -1 | -1 | -- | -- | -- | -- | -- | -- | -- |
| 1EMV.pdb_BR54A  | -1 | 1.666  | -1 | -1 | -1 | -1 | -- | -- | -- | -- | -- | -- | -- | -- | -- | -- |
| 1EMV.pdb_BS74A  | -1 | -0.241 | -1 | -1 | 1  | -1 | -1 | -1 | -1 | -- | -- | -- | -- | -- | -- | -- |
| 1EMV.pdb_BS77A  | -1 | -0.233 | -1 | -1 | -1 | -1 | -1 | -1 | -1 | -- | -- | -- | -- | -- | -- | -- |
| 1EMV.pdb_BS78A  | -1 | -0.540 | -1 | -1 | 1  | -1 | -- | -- | -- | -- | -- | -- | -- | -- | -- | -- |
| 1EMV.pdb_BS84A  | -1 | -0.109 | -1 | -1 | 1  | -1 | -1 | -1 | -1 | -- | -- | -- | -- | -- | -- | -- |
| 1EMV.pdb_BT87A  | -1 | 0.159  | -1 | -1 | -1 | -1 | -1 | -1 | -1 | -- | -- | -- | -- | -- | -- | -- |
| 1EMV.pdb_BV98A  | -1 | 1.089  | -1 | -1 | -1 | -1 | -- | -- | -- | -- | -- | -- | -- | -- | -- | -- |
| 1F47.pdb_AD4A   | -1 | 0.692  | -1 | -1 | -- | -- | -- | -1 | -1 | -- | -- | -- | -- | -1 | -- | -- |
| 1F47.pdb_AD7A   | -1 | 1.734  | -1 | -1 | -- | -- | -- | -- | -- | -- | -- | -- | -- | -1 | -- | -- |
| 1F47.pdb_AF11A  | 1  | 2.445  | -1 | 1  | -- | -- | -- | 1  | 1  | -- | -- | -- | -- | -1 | -- | -- |
| 1F47.pdb_AI8A   | 1  | 2.516  | 1  | 1  | -- | -- | -- | 1  | 1  | -- | -- | -- | -- | -1 | -- | -- |
| 1F47.pdb_AK14A  | -1 | -0.043 | -1 | -1 | -1 | -1 | -- | -- | -- | -- | -- | -- | -- | -- | -- | -- |
| 1F47.pdb_AL12A  | 1  | 2.295  | -1 | -1 | -- | -- | -- | -1 | -1 | -- | -- | -- | -- | -1 | -- | -- |
| 1F47.pdb_AL6A   | -1 | 0.925  | -1 | -1 | -- | -- | -- | -1 | -1 | -- | -- | -- | -- | -1 | -- | -- |
| 1F47.pdb_AP9A   | -1 | -0.058 | -1 | -1 | -1 | -1 | -- | -- | -- | -- | -- | -- | -- | -- | -- | -- |
| 1F47.pdb_AQ15A  | -1 | -0.046 | -1 | 1  | -- | -- | -- | -1 | -1 | -- | -- | -- | -- | -1 | -- | -- |
| 1F47.pdb_AY5A   | -1 | 0.869  | -1 | -- | -- | -- | -- | -- | -1 | -- | -- | -- | -- | -1 | -- | -- |
| 1FC2.pdb_CI150A | 1  | 5.277  | 1  | -1 | -- | -- | -- | 1  | 1  | -- | -- | -- | -- | 1  | -1 | -1 |
| 1FC2.pdb_CK154A | -1 | 1.527  | -1 | -1 | -- | -- | -- | -1 | -1 | -- | -- | -- | -- | -1 | -1 | -1 |
| 1FC2.pdb_CN147A | -1 | 0.606  | -1 | -1 | -- | -- | -- | -1 | -1 | -- | -- | -- | -- | -1 | -1 | -1 |
| 1FCC.pdb_CD40A  | -1 | 0.272  | -1 | 1  | -- | -- | -- | -1 | -1 | -- | -- | -1 | -- | -1 | -1 | -1 |
| 1FCC.pdb_CE42A  | -1 | 0.385  | -1 | -1 | -- | -- | -- | -1 | -1 | -- | -- | -1 | -- | -1 | -1 | -1 |
| 1FCC.pdb_CK28A  | -1 | 1.256  | 1  | 1  | -- | -- | -- | 1  | 1  | -- | -- | -1 | -- | -1 | 1  | 1  |
| 1FCC.pdb_CK31A  | 1  | 3.478  | -1 | -1 | -- | -- | -- | -1 | 1  | -- | -- | -1 | -- | 1  | 1  | 1  |
| 1FCC.pdb_CN35A  | 1  | 2.365  | -1 | -1 | -- | -- | -- | -1 | 1  | -- | -- | -1 | -- | 1  | 1  | 1  |
| 1FCC.pdb_CT25A  | -1 | 0.240  | -1 | -1 | -- | -- | -- | -- | -- | -- | -- | -1 | -- | -1 | -1 | -1 |
| 1FCC.pdb_CW43A  | 1  | 3.773  | 1  | 1  | -- | -- | -- | -1 | -1 | -- | -- | 1  | -- | 1  | 1  | 1  |
| 1FFW.pdb_BC213A | -1 | 0.204  | -1 | -1 | -1 | -1 | -1 | -1 | -1 | -- | -- | -- | -- | -- | -- | -- |
| 1FFW.pdb_BD207A | -1 | 0.096  | -1 | -1 | -1 | -1 | -1 | -1 | -1 | -- | -- | -- | -- | -- | -- | -- |
| 1FFW.pdb_BE171A | -1 | 0.717  | -1 | -1 | -1 | -1 | -- | -- | -- | -- | -- | -- | -- | -- | -- | -- |
| 1FFW.pdb_BE178A | -1 | 0.639  | -1 | -1 | 1  | -1 | 1  | -1 | -1 | -- | -- | -- | -- | -- | -- | -- |
| 1FFW.pdb_BF214A | 1  | 3.646  | 1  | 1  | 1  | 1  | 1  | -1 | -1 | -- | -- | -- | -- | -- | -- | -- |
| 1FFW.pdb_BH181A | -1 | 0.034  | -1 | -1 | -1 | -1 | -1 | -1 | -1 | -- | -- | -- | -- | -- | -- | -- |
| 1GC1.pdb_CD63A  | -1 | -0.319 | -1 | -1 | -- | -- | -- | -1 | -1 | -1 | -1 | -1 | -1 | -1 | -1 | -1 |
| 1GC1.pdb_CE85A  | -1 | 1.323  | -1 | -1 | -- | -- | -- | -- | -- | 1  | -- | -- | -- | -1 | -1 | -1 |
| 1GC1.pdb_CH27A  | -1 | 0.283  | -1 | -1 | -- | -- | -- | 1  | -1 | -1 | -1 | -1 | -1 | -1 | -1 | -1 |
| 1GC1.pdb_CK29A  | -1 | 0.536  | -1 | -1 | -- | -- | -- | 1  | 1  | -1 | -1 | 1  | -- | -1 | -1 | -1 |
| 1GC1.pdb_CK35A  | -1 | 0.322  | -1 | -1 | -- | -- | -- | -1 | 1  | -1 | -1 | -1 | -1 | -1 | -1 | -1 |
| 1GC1.pdb_CK46A  | -1 | 1.431  | -1 | -1 | -1 | -1 | -1 | -1 | -1 | -- | -- | -- | -- | -- | -- | -- |
| 1GC1.pdb_CL44A  | -1 | 1.056  | -1 | -1 | -- | -- | -- | -1 | -1 | -1 | -1 | -1 | -- | -1 | -1 | -1 |
| 1GC1.pdb_CN32A  | -1 | 0.183  | -1 | -1 | -- | -- | -- | -- | -1 | -1 | -1 | -1 | -1 | -1 | -1 | -1 |
| 1GC1.pdb_CN52A  | -1 | 0.708  | -1 | -1 | -- | -- | -- | -1 | -1 | -1 | -1 | -1 | -- | -1 | -1 | -1 |
| 1GC1.pdb_CQ25A  | -1 | 0.032  | -1 | -1 | -- | -- | -- | -- | -1 | -1 | -1 | -1 | -1 | -1 | -1 | -1 |
| 1GC1.pdb_CQ33A  | -1 | 0.105  | -1 | -1 | -- | -- | -- | -1 | -1 | -1 | -1 | -1 | -1 | -1 | -1 | -1 |
| 1GC1.pdb_CQ40A  | -1 | -0.411 | -1 | -1 | -- | -- | -- | -1 | -1 | -1 | -1 | -1 | 1  | 1  | 1  | -1 |
| 1GC1.pdb_CQ64A  | -1 | 0.443  | -1 | -1 | -- | -- | -- | -1 | -1 | -1 | -1 | -1 | -- | -1 | -1 | -1 |
| 1GC1.pdb_CR59A  | -1 | 1.176  | -1 | -1 | -- | -- | -- | -1 | -1 | -1 | -1 | -1 | -- | -1 | 1  | 1  |
| 1GC1.pdb_CS23A  | -1 | 0.293  | -1 | -1 | -- | -- | -- | -- | -- | -1 | -1 | -1 | -- | -1 | -1 | -1 |
| 1GC1.pdb_CS42A  | -1 | 0.000  | -1 | -1 | -- | -- | -- | -1 | -1 | -1 | -1 | -1 | -1 | -1 | 1  | 1  |
| 1GC1.pdb_CS60A  | -1 | -0.089 | -1 | -1 | -- | -- | -- | -1 | -1 | -1 | -1 | -1 | -1 | -1 | -1 | -1 |
| 1GC1.pdb_CT45A  | -1 | -0.149 | -1 | -1 | -- | -- | -- | -1 | -1 | -1 | -1 | -1 | -1 | -1 | -1 | -1 |
| 1GCQ.pdb_CP595A | -1 | 0.768  | -1 | -1 | 1  | -1 | -1 | -1 | -1 | -- | -- | -- | -- | -- | -- | -- |
| 1GCQ.pdb_CP608A | -1 | 0.121  | -1 | -1 | -1 | -1 | -1 | -1 | -1 | -- | -- | -- | -- | -- | -- | -- |
| 1GCQ.pdb_CP609A | -1 | 0.085  | -1 | -1 | -1 | -1 | -1 | -1 | -1 | -- | -- | -- | -- | -- | -- | -- |
| 1GCQ.pdb_CP657A | -1 | 1.316  | -1 | -1 | 1  | -1 | -1 | -1 | -1 | -- | -- | -- | -- | -- | -- | -- |
| 1H9D.pdb_BG61A  | 1  | 2.077  | -1 | -1 | -1 | -1 | -1 | -1 | -1 | -- | -- | -- | -- | -- | -- | -- |
| 1H9D.pdb_BL103A | -1 | 0.940  | -1 | -1 | 1  | 1  | 1  | -1 | 1  | -- | -- | -- | -- | -- | -- | -- |

## Supplementary Text S4: Hotspot Predictor Predictions and Performance

|                 |    |        |    |    |    |    |    |    |    |    |    |    |    |    |    |
|-----------------|----|--------|----|----|----|----|----|----|----|----|----|----|----|----|----|
| 1H9D.pdb_BN104A | 1  | 2.304  | -1 | -1 | 1  | -1 | 1  | 1  | 1  | -- | -- | -- | -- | -- | -- |
| 1H9D.pdb_BQ67A  | -1 | 1.364  | -1 | -1 | 1  | -1 | 1  | -1 | -1 | -- | -- | -- | -- | -- | -- |
| 1H9D.pdb_BR3A   | -1 | 1.162  | -1 | -1 | 1  | -1 | -1 | -1 | -1 | -- | -- | -- | -- | -- | -- |
| 1H9D.pdb_BV4A   | -1 | 1.402  | -1 | -1 | -1 | -1 | -- | -- | -- | -- | -- | -- | -- | -- | -- |
| 1IAR.pdb_AF82A  | -1 | -0.086 | -1 | -1 | -1 | -1 | -- | -- | -- | -- | -- | -- | -- | -- | -- |
| 1IAR.pdb_AI5A   | -1 | 1.171  | 1  | -1 | -1 | -1 | -1 | 1  | 1  | -- | -- | -- | -- | -- | -- |
| 1IAR.pdb_AN89A  | -1 | 1.559  | -1 | -1 | 1  | 1  | 1  | -1 | 1  | -- | -- | -- | -- | -- | -- |
| 1IAR.pdb_AQ78A  | -1 | 0.125  | -1 | -1 | -1 | -1 | -- | -- | -- | -- | -- | -- | -- | -- | -- |
| 1IAR.pdb_AQ8A   | -1 | -0.022 | -1 | -1 | -1 | -1 | -- | -- | -- | -- | -- | -- | -- | -- | -- |
| 1IAR.pdb_AR81A  | -1 | 0.480  | -1 | -1 | -1 | -1 | -1 | -1 | -1 | -- | -- | -- | -- | -- | -- |
| 1IAR.pdb_AR85A  | -1 | 0.427  | 1  | 1  | 1  | 1  | 1  | 1  | 1  | -- | -- | -- | -- | -- | -- |
| 1IAR.pdb_AR88A  | 1  | 3.755  | -1 | -1 | 1  | 1  | -1 | 1  | 1  | -- | -- | -- | -- | -- | -- |
| 1IAR.pdb_AT13A  | -1 | 0.979  | -1 | -1 | -1 | -1 | -- | -- | -- | -- | -- | -- | -- | -- | -- |
| 1IAR.pdb_AT6A   | -1 | -0.104 | -1 | -1 | -1 | -1 | -- | -- | -- | -- | -- | -- | -- | -- | -- |
| 1IAR.pdb_AW91A  | -1 | 0.730  | -1 | -1 | -1 | -1 | 1  | -1 | 1  | -- | -- | -- | -- | -- | -- |
| 1JCK.pdb_BF176A | 1  | 2.134  | 1  | -1 | -- | -- | -- | -1 | -1 | -- | -- | -1 | -- | -1 | -1 |
| 1JCK.pdb_BK103A | -1 | 0.677  | -1 | -1 | -- | -- | -- | -1 | -1 | -- | -- | -1 | -- | -1 | -1 |
| 1JCK.pdb_BN60A  | -1 | 1.643  | -1 | -1 | -- | -- | -- | -- | -- | -- | -- | -1 | -- | -1 | -1 |
| 1JCK.pdb_BT20A  | -1 | 1.655  | 1  | -- | -- | -- | -- | -1 | -1 | -- | -- | -1 | -- | -1 | -1 |
| 1JCK.pdb_BV91A  | 1  | 2.233  | 1  | -1 | -- | -- | -- | -1 | -1 | -- | -- | -1 | -- | -1 | -1 |
| 1JCK.pdb_BY26A  | -1 | 1.775  | -1 | -1 | -- | -- | -- | -1 | -1 | -- | -- | -1 | -- | -1 | -1 |
| 1JCK.pdb_BY90A  | 1  | 2.596  | -1 | -1 | -- | -- | -- | -1 | -1 | -- | -- | -1 | -- | -1 | -1 |
| 1JRH.pdb_HD56A  | -1 | 1.887  | -1 | -1 | -- | -- | -- | -1 | -1 | -- | -- | -- | -- | -1 | -1 |
| 1JRH.pdb_HD58A  | -1 | 1.855  | -1 | 1  | -- | -- | -- | -- | -- | -- | -- | -- | -- | -- | -- |
| 1JRH.pdb_HH107A | -1 | 1.699  | -1 | -1 | 1  | 1  | 1  | -1 | 1  | -- | -- | -- | -- | -- | -- |
| 1JRH.pdb_HR100A | -1 | 0.543  | -1 | -1 | -- | -- | -- | -- | -- | -- | -- | -- | -- | -- | -- |
| 1JRH.pdb_HW54A  | 1  | 2.687  | -1 | -1 | -- | -- | -- | -- | -- | -- | -- | -- | -- | -- | -- |
| 1JRH.pdb_HW55A  | 1  | 2.422  | -1 | -1 | -- | -- | -- | -1 | -1 | -- | -- | -- | -- | -- | -- |
| 1JRH.pdb_HY104A | -1 | 1.062  | -1 | 1  | -- | -- | -- | -1 | -1 | -- | -- | -- | -- | -- | -- |
| 1JRH.pdb_HY32A  | -1 | 1.434  | -1 | -1 | -- | -- | -- | -1 | 1  | -- | -- | -- | -- | -1 | -1 |
| 1JRH.pdb_HY60A  | -1 | 1.256  | -1 | -1 | -- | -- | -- | -- | -- | -- | -- | -- | -- | -- | -- |
| 1JRH.pdb_IE55A  | -1 | -0.435 | -1 | -1 | -- | -- | -- | -1 | -1 | -- | -- | -- | -- | -1 | -1 |
| 1JRH.pdb_IG50A  | 1  | 4.527  | 1  | -1 | 1  | -1 | -1 | -1 | -1 | -- | -- | -- | -- | -- | -- |
| 1JRH.pdb_IK47A  | 1  | 3.579  | 1  | -1 | -- | -- | -- | -1 | -1 | -- | -- | -- | -- | 1  | 1  |
| 1JRH.pdb_IK52A  | 1  | 2.985  | 1  | -- | -- | -- | -- | -- | -1 | -- | -- | -- | -- | -1 | 1  |
| 1JRH.pdb_IK98A  | -1 | -0.043 | -1 | -1 | -- | -- | -- | -- | -- | -- | -- | -- | -- | -1 | -1 |
| 1JRH.pdb_IN48A  | -1 | -0.293 | 1  | -1 | -1 | -1 | -- | -- | -- | -- | -- | -- | -- | -- | -- |
| 1JRH.pdb_IN53A  | 1  | 3.894  | -1 | -1 | -- | -- | -- | -1 | -1 | -- | -- | -- | -- | 1  | 1  |
| 1JRH.pdb_IR84A  | -1 | -0.246 | -1 | -1 | -- | -- | -- | -- | -- | -- | -- | -- | -- | -1 | -1 |
| 1JRH.pdb_IS54A  | -1 | 0.298  | -1 | -1 | -- | -- | -- | -1 | -1 | -- | -- | -- | -- | -1 | 1  |
| 1JRH.pdb_IV51A  | -1 | 1.884  | -1 | -1 | -- | -- | -- | -- | 1  | -- | -- | -- | -- | -1 | 1  |
| 1JRH.pdb_JW82A  | 1  | 4.529  | -1 | -1 | -- | -- | -- | -1 | -1 | -- | -- | -- | -- | 1  | -1 |
| 1JRH.pdb_IY49A  | 1  | 3.401  | 1  | -1 | -- | -- | -- | 1  | 1  | -- | -- | -- | -- | -1 | 1  |
| 1JRH.pdb_LD28A  | -1 | 0.435  | -1 | -1 | -- | -- | -- | -- | -- | -- | -- | -- | -- | -1 | -1 |
| 1JRH.pdb_LE27A  | -1 | 0.543  | -1 | -1 | -- | -- | -- | -- | -- | -- | -- | -- | -- | -1 | -1 |
| 1JRH.pdb_LS93A  | -1 | -0.651 | -1 | 1  | -- | -- | -- | -1 | -1 | -- | -- | -- | -- | -1 | 1  |
| 1JRH.pdb_LT94A  | -1 | 0.385  | -1 | -1 | -- | -- | -- | -- | -1 | -- | -- | -- | -- | -1 | -1 |
| 1JRH.pdb_LW92A  | 1  | 2.820  | 1  | -1 | -- | -- | -- | 1  | 1  | -- | -- | -- | -- | 1  | 1  |
| 1JRH.pdb_LY30A  | -1 | 1.109  | -1 | -1 | -- | -- | -- | -1 | 1  | -- | -- | -- | -- | -1 | -1 |
| 1JRH.pdb_LY91A  | -1 | 0.581  | -1 | 1  | -- | -- | -- | -- | -- | -- | -- | -- | -- | -1 | 1  |
| 1JTG.pdb_AE104A | -1 | 1.553  | 1  | -1 | -- | -- | -- | -1 | 1  | 1  | 1  | -- | -- | 1  | 1  |
| 1JTG.pdb_AE110A | 1  | 4.062  | -1 | -1 | 1  | -1 | -1 | 1  | 1  | -- | -- | -- | -- | -- | -- |
| 1JTG.pdb_AE168A | -1 | -0.073 | -1 | -1 | -1 | -1 | -1 | -1 | -1 | -- | -- | -- | -- | -- | -- |
| 1JTG.pdb_AM129A | -1 | 0.739  | -1 | -1 | 1  | -1 | 1  | -1 | -1 | -- | -- | -- | -- | -- | -- |
| 1JTG.pdb_AN100A | -1 | -0.456 | -1 | -1 | -1 | -1 | -1 | -1 | -1 | -- | -- | -- | -- | -- | -- |
| 1JTG.pdb_AP107A | -1 | -0.383 | -1 | -1 | 1  | -1 | -1 | -1 | -1 | -- | -- | -- | -- | -- | -- |
| 1JTG.pdb_AQ99A  | -1 | 0.430  | -1 | -1 | -1 | -1 | -1 | 1  | -- | -- | -- | -- | -- | -- | -- |
| 1JTG.pdb_AR243A | -1 | 1.339  | -1 | -1 | -- | -- | -- | -- | -- | -1 | -1 | -- | -- | -1 | -1 |
| 1JTG.pdb_AS130A | -1 | 0.792  | -1 | -1 | -- | -- | -- | -1 | -1 | -1 | -1 | -- | -- | -1 | 1  |
| 1JTG.pdb_AV103A | -1 | 1.911  | 1  | -1 | -1 | 1  | 1  | -1 | -1 | -- | -- | -- | -- | -- | -- |
| 1JTG.pdb_AV216A | -1 | -0.407 | -1 | -1 | 1  | -1 | 1  | -1 | -1 | -- | -- | -- | -- | -- | -- |
| 1JTG.pdb_AY105A | -1 | -0.168 | 1  | 1  | -- | -- | -- | 1  | 1  | 1  | 1  | -- | -- | 1  | 1  |
| 1JTG.pdb_BD163A | -1 | -1.341 | -1 | -1 | -1 | -1 | -- | -- | -- | -- | -- | -- | -- | -- | -- |
| 1JTG.pdb_BD49A  | 1  | 2.561  | -1 | -1 | -- | -- | -- | 1  | 1  | -1 | 1  | -- | -- | -1 | 1  |
| 1JTG.pdb_BF142A | 1  | 3.379  | -1 | -1 | -- | -- | -- | -1 | -1 | 1  | 1  | -- | -- | 1  | 1  |
| 1JTG.pdb_BF36A  | 1  | 3.201  | -1 | -1 | 1  | 1  | 1  | -1 | 1  | -- | -- | -- | -- | -- | -- |
| 1JTG.pdb_BH148A | 1  | 2.748  | -1 | -1 | 1  | 1  | -1 | -1 | -1 | -- | -- | -- | -- | -- | -- |
| 1JTG.pdb_BH41A  | 1  | 3.250  | -1 | -1 | 1  | 1  | -- | -- | -- | -- | -- | -- | -- | -- | -- |
| 1JTG.pdb_BK74A  | 1  | 3.560  | 1  | -1 | -- | -- | -- | -1 | -1 | -1 | -1 | -- | -- | 1  | 1  |
| 1JTG.pdb_BR160A | 1  | 2.222  | -1 | -1 | -1 | -1 | -1 | -1 | -1 | -- | -- | -- | -- | -- | -- |
| 1JTG.pdb_BS113A | -1 | -0.168 | -1 | -1 | -1 | -1 | -1 | -1 | -1 | -- | -- | -- | -- | -- | -- |
| 1JTG.pdb_BS71A  | -1 | 0.358  | -1 | -1 | -1 | -1 | -1 | -1 | -1 | -- | -- | -- | -- | -- | -- |
| 1JTG.pdb_BW112A | 1  | 3.011  | 1  | -1 | 1  | 1  | 1  | 1  | -1 | -- | -- | -- | -- | -- | -- |
| 1JTG.pdb_BW150A | 1  | 4.254  | -1 | -1 | -1 | -1 | -1 | 1  | 1  | -- | -- | -- | -- | -- | -- |
| 1JTG.pdb_BW162A | 1  | 2.341  | 1  | 1  | 1  | 1  | -1 | -1 | 1  | -- | -- | -- | -- | -- | -- |
| 1JTG.pdb_BY143A | -1 | 0.382  | -1 | -1 | -- | -- | -- | -1 | -1 | -1 | -1 | -- | -- | 1  | -1 |
| 1JTG.pdb_BY50A  | -1 | -0.407 | 1  | 1  | 1  | 1  | -1 | 1  | 1  | -- | -- | -- | -- | -- | -- |
| 1JTG.pdb_BY53A  | 1  | 2.077  | 1  | -1 | 1  | 1  | -1 | 1  | 1  | -- | -- | -- | -- | -- | -- |

## Supplementary Text S4: Hotspot Predictor Predictions and Performance

|                 |    |        |    |    |    |    |    |    |    |    |    |    |    |    |    |    |
|-----------------|----|--------|----|----|----|----|----|----|----|----|----|----|----|----|----|----|
| 1KTZ.pdb_AR25A  | -1 | 1.482  | -1 | -1 | -1 | -1 | -1 | -1 | -1 | -1 | -- | -- | -- | -- | -- | -- |
| 1KTZ.pdb_AR94A  | 1  | 2.884  | -1 | -1 | -1 | -1 | -1 | -1 | -1 | -1 | -- | -- | -- | -- | -- | -- |
| 1KTZ.pdb_BD118A | -1 | 1.261  | -1 | -1 | -1 | -1 | -- | -- | -- | -- | -- | -- | -- | -- | -- | -- |
| 1KTZ.pdb_BD32A  | -1 | 1.968  | -1 | -1 | -1 | -1 | -1 | -1 | -1 | -1 | -- | -- | -- | -- | -- | -- |
| 1KTZ.pdb_BE119A | -1 | 1.941  | -1 | 1  | -1 | -1 | -1 | -1 | -1 | 1  | -- | -- | -- | -- | -- | -- |
| 1KTZ.pdb_BE55A  | -1 | 1.663  | -1 | -1 | -1 | -1 | -1 | -1 | -1 | 1  | -- | -- | -- | -- | -- | -- |
| 1KTZ.pdb_BF30A  | 1  | 3.427  | -1 | -1 | 1  | 1  | 1  | -1 | -1 | -1 | -- | -- | -- | -- | -- | -- |
| 1KTZ.pdb_BI50A  | 1  | 2.343  | -1 | -1 | 1  | -1 | 1  | -1 | -1 | -1 | -- | -- | -- | -- | -- | -- |
| 1KTZ.pdb_BI53A  | -1 | 1.817  | -1 | -1 | -1 | -1 | 1  | 1  | -1 | 1  | -- | -- | -- | -- | -- | -- |
| 1KTZ.pdb_BL27A  | 1  | 2.271  | -1 | -1 | 1  | 1  | 1  | 1  | 1  | 1  | -- | -- | -- | -- | -- | -- |
| 1KTZ.pdb_BS49A  | -1 | 0.773  | -1 | -1 | -1 | -1 | -1 | -- | -- | -- | -- | -- | -- | -- | -- | -- |
| 1KTZ.pdb_BS52A  | -1 | 0.663  | -1 | -1 | 1  | -1 | -1 | -1 | -1 | 1  | -- | -- | -- | -- | -- | -- |
| 1KTZ.pdb_BT51A  | -1 | 1.960  | -1 | -1 | 1  | -1 | -1 | -1 | -1 | 1  | -- | -- | -- | -- | -- | -- |
| 1KTZ.pdb_BV77A  | -1 | 0.862  | -1 | -1 | -1 | -1 | -1 | -- | -- | -- | -- | -- | -- | -- | -- | -- |
| 1LFD.pdb_AD51A  | -1 | -0.579 | -1 | -1 | -1 | -1 | -1 | -1 | -1 | -1 | -- | -- | -- | -- | -- | -- |
| 1LFD.pdb_AD56A  | -1 | -0.280 | -1 | -1 | -1 | -1 | -- | -- | -- | -- | -- | -- | -- | -- | -- | -- |
| 1LFD.pdb_AK32A  | -1 | 1.326  | 1  | 1  | 1  | 1  | -1 | 1  | 1  | 1  | -- | -- | -- | -- | -- | -- |
| 1LFD.pdb_AK52A  | -1 | 1.179  | -1 | -1 | -1 | -1 | -1 | -1 | -1 | -1 | -- | -- | -- | -- | -- | -- |
| 1LFD.pdb_AR20A  | -1 | 1.136  | -1 | -1 | -1 | -1 | -- | -- | -- | -- | -- | -- | -- | -- | -- | -- |
| 1NMB.pdb_HY103A | 1  | 2.142  | -1 | -1 | -- | -- | -- | -1 | -1 | -1 | -- | -- | -- | -- | -- | -- |
| 1PPF.pdb_IE19A  | -1 | 1.203  | -1 | -1 | -1 | -1 | -1 | -1 | -1 | -1 | -- | -- | -- | -- | -- | -- |
| 1PPF.pdb_IJ32A  | -1 | 0.235  | -1 | -1 | -1 | -1 | -1 | -1 | -1 | 1  | -- | -- | -- | -- | -- | -- |
| 1PPF.pdb_IL18A  | -1 | 1.071  | 1  | -1 | 1  | 1  | 1  | 1  | 1  | 1  | -- | -- | -- | -- | -- | -- |
| 1PPF.pdb_IN36A  | -1 | -1.646 | -1 | -1 | -1 | -1 | -1 | -1 | -1 | -1 | -- | -- | -- | -- | -- | -- |
| 1PPF.pdb_IP14A  | -1 | -0.124 | -1 | -1 | -1 | -1 | -1 | -1 | -1 | -1 | -- | -- | -- | -- | -- | -- |
| 1PPF.pdb_IR21A  | -1 | 0.208  | -1 | -1 | -1 | -1 | -1 | -1 | -1 | -1 | -- | -- | -- | -- | -- | -- |
| 1PPF.pdb_IT17A  | 1  | 3.485  | 1  | -1 | 1  | -1 | -1 | -1 | -1 | 1  | -- | -- | -- | -- | -- | -- |
| 1PPF.pdb_IY20A  | 1  | 3.210  | 1  | 1  | 1  | 1  | 1  | 1  | 1  | 1  | -- | -- | -- | -- | -- | -- |
| 1R0R.pdb_IE19A  | 1  | 2.089  | 1  | -1 | 1  | 1  | 1  | -1 | 1  | 1  | -- | -- | -- | -- | -- | -- |
| 1R0R.pdb_IJ32A  | -1 | 1.298  | -1 | -1 | -1 | -1 | -1 | -- | -- | -- | -- | -- | -- | -- | -- | -- |
| 1R0R.pdb_IK13A  | -1 | -0.610 | -1 | -1 | -1 | -1 | -1 | -1 | -1 | -1 | -- | -- | -- | -- | -- | -- |
| 1R0R.pdb_IL18A  | -1 | 0.315  | -1 | -1 | 1  | 1  | 1  | -1 | 1  | 1  | -- | -- | -- | -- | -- | -- |
| 1R0R.pdb_IP14A  | -1 | -0.639 | -1 | -1 | -1 | -1 | -1 | -1 | -1 | -1 | -- | -- | -- | -- | -- | -- |
| 1R0R.pdb_IR21A  | -1 | -0.096 | -1 | -1 | -1 | -1 | -1 | -1 | -1 | -1 | -- | -- | -- | -- | -- | -- |
| 1R0R.pdb_IT17A  | -1 | 1.173  | -1 | -1 | 1  | -1 | -1 | -1 | -1 | 1  | -- | -- | -- | -- | -- | -- |
| 1R0R.pdb_IY20A  | 1  | 5.475  | 1  | 1  | 1  | -1 | -1 | -1 | -1 | 1  | -- | -- | -- | -- | -- | -- |
| 1REW.pdb_CQ86A  | 1  | 2.659  | 1  | -1 | 1  | 1  | 1  | 1  | 1  | 1  | -- | -- | -- | -- | -- | -- |
| 1S1Q.pdb_AD46A  | -1 | 0.966  | -1 | -1 | -1 | -1 | -1 | -1 | -1 | -1 | -- | -- | -- | -- | -- | -- |
| 1S1Q.pdb_AF44A  | -1 | 0.199  | -1 | -1 | -1 | -1 | -1 | -1 | -1 | -1 | -- | -- | -- | -- | -- | -- |
| 1S1Q.pdb_AF88A  | -1 | 0.775  | -1 | -1 | -1 | 1  | 1  | -1 | -1 | -1 | -- | -- | -- | -- | -- | -- |
| 1S1Q.pdb_AN45A  | -1 | 1.232  | -1 | -1 | 1  | -1 | -1 | -1 | -1 | -1 | -- | -- | -- | -- | -- | -- |
| 1S1Q.pdb_AV43A  | -1 | 0.671  | -1 | -1 | 1  | -1 | 1  | -1 | 1  | 1  | -- | -- | -- | -- | -- | -- |
| 1S1Q.pdb_AW75A  | -1 | 0.281  | -1 | -1 | -1 | -1 | -1 | -- | -- | -- | -- | -- | -- | -- | -- | -- |
| 1SMF.pdb_IE16A  | -1 | 1.013  | -1 | -1 | -1 | -1 | -1 | -1 | -1 | -1 | -- | -- | -- | -- | -- | -- |
| 1SMF.pdb_IJ13A  | 1  | 3.511  | 1  | 1  | 1  | -1 | -1 | -1 | -1 | -1 | -- | -- | -- | -- | -- | -- |
| 1SMF.pdb_IJ12A  | -1 | 1.900  | -1 | -1 | -1 | -1 | -1 | 1  | -1 | -1 | -- | -- | -- | -- | -- | -- |
| 1SMF.pdb_IT10A  | 1  | 2.046  | -1 | -1 | 1  | -1 | -1 | -1 | -1 | -1 | -- | -- | -- | -- | -- | -- |
| 1TM1.pdb_IE60A  | 1  | 2.925  | 1  | -1 | 1  | 1  | 1  | -1 | -1 | -1 | -- | -- | -- | -- | -- | -- |
| 1TM1.pdb_IJ59A  | -1 | 1.028  | 1  | 1  | 1  | 1  | 1  | 1  | 1  | 1  | -- | -- | -- | -- | -- | -- |
| 1TM1.pdb_IR62A  | -1 | 1.256  | -1 | -1 | -1 | -1 | -1 | -1 | -1 | -1 | -- | -- | -- | -- | -- | -- |
| 1TM1.pdb_IR65A  | 1  | 3.080  | -1 | -1 | -1 | -1 | -- | -- | -- | -- | -- | -- | -- | -- | -- | -- |
| 1TM1.pdb_IR67A  | 1  | 2.923  | -1 | -1 | -1 | -1 | -- | -- | -- | -- | -- | -- | -- | -- | -- | -- |
| 1TM1.pdb_IT58A  | 1  | 2.572  | 1  | 1  | 1  | -1 | 1  | 1  | 1  | 1  | -- | -- | -- | -- | -- | -- |
| 1TM1.pdb_IY61A  | 1  | 2.180  | 1  | 1  | 1  | -1 | -1 | -1 | -1 | -1 | -- | -- | -- | -- | -- | -- |
| 1UUZ.pdb_AC64A  | -1 | 0.651  | -1 | -1 | 1  | -1 | 1  | -1 | 1  | 1  | -- | -- | -- | -- | -- | -- |
| 1UUZ.pdb_AH62A  | -1 | 1.775  | -1 | -1 | 1  | -1 | -1 | -1 | -1 | -1 | -- | -- | -- | -- | -- | -- |
| 1VFB.pdb_AH30A  | -1 | 0.845  | -1 | -1 | -- | -- | -- | -1 | -1 | -- | -- | -- | -1 | -1 | -1 | -1 |
| 1VFB.pdb_AS93A  | -1 | 0.343  | -1 | -1 | -- | -- | -- | -1 | -1 | -- | -- | -- | -1 | -1 | -1 | -1 |
| 1VFB.pdb_AW92A  | 1  | 2.728  | 1  | 1  | -- | -- | -- | -1 | -1 | -- | -- | -- | -1 | -1 | -1 | -1 |
| 1VFB.pdb_AY32A  | -1 | 1.340  | 1  | -1 | -- | -- | -- | -1 | -1 | -1 | -- | -1 | -1 | -1 | -1 | -1 |
| 1VFB.pdb_AY49A  | -1 | 0.798  | -1 | -1 | -- | -- | -- | -- | -1 | -1 | -- | -- | -1 | -1 | -1 | -1 |
| 1VFB.pdb_AY50A  | -1 | 0.388  | -1 | -1 | -- | -- | -- | -1 | -1 | -- | -- | -- | -1 | -1 | -1 | -1 |
| 1VFB.pdb_BD100A | 1  | 3.072  | -1 | 1  | -- | -- | -- | -1 | -1 | -- | -- | -- | -1 | 1  | 1  | 1  |
| 1VFB.pdb_BD54A  | -1 | 0.639  | -1 | -1 | -1 | -1 | -1 | -1 | -1 | -- | -- | -- | -1 | -1 | -1 | -1 |
| 1VFB.pdb_BR99A  | -1 | -0.100 | -1 | -1 | -- | -- | -- | -- | -- | -- | -- | -- | -1 | -1 | -1 | -1 |
| 1VFB.pdb_BT30A  | -1 | -0.056 | -1 | -1 | -- | -- | -- | -- | -- | -- | -- | -- | -1 | -1 | -1 | -1 |
| 1VFB.pdb_BW52A  | -1 | 0.364  | -1 | -1 | -- | -- | -- | 1  | 1  | -1 | -- | -1 | -1 | -1 | -1 | -1 |
| 1VFB.pdb_BY32A  | -1 | 0.460  | -1 | -1 | -- | -- | -- | -- | -- | -- | -- | -- | -1 | -1 | -1 | -1 |
| 1VFB.pdb_CD119A | -1 | 0.954  | -1 | -1 | -- | -- | -- | -1 | -1 | -- | -- | -1 | -1 | 1  | 1  | 1  |
| 1VFB.pdb_CD18A  | -1 | 0.340  | -1 | -1 | -- | -- | -- | -- | -- | -- | -- | -1 | -1 | -1 | -1 | -1 |
| 1VFB.pdb_CI124A | -1 | 1.232  | -1 | -1 | -- | -- | -- | -1 | -1 | -- | -- | -1 | -1 | -1 | -1 | -1 |
| 1VFB.pdb_CK116A | -1 | 0.714  | -1 | -1 | -- | -- | -- | -- | -- | -1 | -- | -1 | -1 | -1 | -1 | -1 |
| 1VFB.pdb_CL129A | -1 | 0.172  | -1 | -1 | -- | -- | -- | -1 | -1 | -- | -- | -1 | -1 | -1 | -1 | -1 |
| 1VFB.pdb_CN19A  | -1 | 0.396  | -1 | -1 | -- | -- | -- | -1 | -1 | -- | -- | -1 | -1 | -1 | -1 | -1 |
| 1VFB.pdb_CQ121A | 1  | 2.878  | 1  | 1  | -- | -- | -- | 1  | 1  | -- | -- | 1  | -- | 1  | 1  | 1  |
| 1VFB.pdb_CR125A | -1 | 1.838  | -1 | -1 | -- | -- | -- | -1 | -1 | -- | -- | 1  | -- | -1 | -1 | -1 |
| 1VFB.pdb_CS24A  | -1 | 0.851  | -1 | -1 | -- | -- | -- | -1 | -1 | -- | -- | -1 | -- | -1 | -1 | -1 |
| 1VFB.pdb_CT118A | -1 | 0.765  | -1 | -1 | -- | -- | -- | -1 | -1 | -- | -- | -1 | -- | -1 | -1 | -1 |







## Supplementary Text S4: Hotspot Predictor Predictions and Performance

|                 |    |        |    |    |    |    |    |    |    |    |    |    |    |    |    |
|-----------------|----|--------|----|----|----|----|----|----|----|----|----|----|----|----|----|
| 3NPS.pdb_AQ185A | -1 | 0.741  | -1 | -1 | -1 | -1 | -- | -- | -- | -- | -- | -- | -- | -- | -- |
| 3NPS.pdb_AQ235A | -1 | -0.041 | -1 | -1 | -1 | -1 | -- | -- | -- | -- | -- | -- | -- | -- | -- |
| 3NPS.pdb_AR63A  | -1 | -1.063 | -1 | -1 | -1 | -1 | -1 | -1 | 1  | -- | -- | -- | -- | -- | -- |
| 3NPS.pdb_AT108A | -1 | 0.724  | -1 | -1 | -1 | -1 | -1 | -1 | -1 | -- | -- | -- | -- | -- | -- |
| 3NPS.pdb_AT160A | -1 | 0.175  | -1 | -1 | -1 | -1 | -- | -- | -- | -- | -- | -- | -- | -- | -- |
| 3NPS.pdb_AY156A | -1 | 1.776  | -1 | -1 | -1 | -1 | -1 | -1 | -1 | -- | -- | -- | -- | -- | -- |
| 3NPS.pdb_AY67A  | -1 | 0.452  | -1 | -1 | -1 | -1 | -- | -- | -- | -- | -- | -- | -- | -- | -- |
| 3SGB.pdb_IJ19A  | -1 | 1.019  | -1 | -1 | 1  | -1 | -1 | -1 | -1 | -- | -- | -- | -- | -- | -- |
| 3SGB.pdb_IJ32A  | -1 | 1.223  | -1 | -1 | -1 | -1 | -1 | -1 | -1 | -- | -- | -- | -- | -- | -- |
| 3SGB.pdb_IK13A  | -1 | -2.572 | -1 | -1 | -1 | -1 | -1 | -1 | -1 | -- | -- | -- | -- | -- | -- |
| 3SGB.pdb_IL18A  | 1  | 2.989  | -1 | -1 | 1  | 1  | 1  | 1  | 1  | -- | -- | -- | -- | -- | -- |
| 3SGB.pdb_IN36A  | -1 | 0.331  | -1 | -1 | -1 | -1 | -1 | -1 | -1 | -- | -- | -- | -- | -- | -- |
| 3SGB.pdb_IP14A  | -1 | -0.189 | -1 | -1 | -1 | -1 | -1 | -1 | -1 | -- | -- | -- | -- | -- | -- |
| 3SGB.pdb_IR21A  | -1 | 0.054  | -1 | -1 | -1 | -1 | -1 | -1 | 1  | -- | -- | -- | -- | -- | -- |
| 3SGB.pdb_IT17A  | 1  | 3.592  | 1  | -1 | 1  | -1 | -1 | -1 | 1  | -- | -- | -- | -- | -- | -- |
| 3SGB.pdb_IY20A  | -1 | 1.944  | 1  | 1  | 1  | 1  | 1  | 1  | 1  | -- | -- | -- | -- | -- | -- |
| 4CPA.pdb_IV38A  | 1  | 2.326  | 1  | -1 | 1  | -1 | 1  | -1 | -1 | -- | -- | -- | -- | -- | -- |

\* Indicate Hotspot Predictors used for the generation of hotspot descriptors and further analyzed in main manuscript for off-rate prediction.

### References:

1. Zhu X, Mitchell JC (2011) KFC2: a knowledge-based hot spot prediction method based on interface solvation, atomic density, and plasticity features. *Proteins* 79: 2671-2683.
2. Kortemme T, Baker D (2002) A simple physical model for binding energy hot spots in protein-protein complexes. *Proc Natl Acad Sci U S A* 99: 14116-14121.
3. Tuncbag N, Gursoy A, Keskin O (2009) Identification of computational hot spots in protein interfaces: combining solvent accessibility and inter-residue potentials improves the accuracy. *Bioinformatics* 25: 1513-1520.
4. Wang L, Liu ZP, Zhang XS, Chen L (2012) Prediction of hot spots in protein interfaces using a random forest model with hybrid features. *Protein Eng Des Sel* 25: 119-126.
5. Lise S, Archambeau C, Pontil M, Jones DT (2009) Prediction of hot spot residues at protein-protein interfaces by combining machine learning and energy-based methods. *BMC Bioinformatics* 10: 365.
