# Supplementary material for: Characterizing Changes in the Rate of Protein-Protein Dissociation upon Interface Mutation Using Hotspot Energy and Organization
Source: PubMed Central journal article supplement (PMC3764008; doi:10.1371/journal.pcbi.1003216), 2013-09-05
Supplement: pcbi.1003216.s015.pdf [file pcbi.1003216.s015.pdf]

## Supplementary Text S5: Descriptor Performance Measures (PCC / U-Test /AUC)

Table S6. Ranked absolute PCCs of hotspot and molecular descriptors with experimental  $\Delta\log_{10}(k_{off})$ . Experimental data for  $\log_{10}(k_{off})$  is based on the 713 kinetically characterized mutations from SKEMPI. Descriptor Categories: AP – Atomic-based Statistical Potential, CP – Coarse-Grain Statistical Potential, PB – Physics-based Energy Term. For Hotspot Descriptors, Descriptor Categories shows hotspot prediction algorithm generating the respective hotspot predictor.

| Rank | Descriptor               | Descriptor Category | Pearson's Correlation Coefficient | Ranked Absolute Pearson's Correlation Coefficient | Descriptor Type |
|------|--------------------------|---------------------|-----------------------------------|---------------------------------------------------|-----------------|
| 1    | SuppHSEnergy             | KFC2a               | -0.617                            | 0.617                                             | Hotspot         |
| 2    | CoreHSEnergy             | Hotpoint1           | -0.608                            | 0.608                                             | Hotspot         |
| 3    | HSEner_PosCoop           | RFSpot              | -0.573                            | 0.573                                             | Hotspot         |
| 4    | Int_HS_Energy            | Hotpoint1           | -0.568                            | 0.568                                             | Hotspot         |
| 5    | CoreHSEnergy             | RFSpot_KFC2         | -0.560                            | 0.560                                             | Hotspot         |
| 6    | Int_HS_Energy            | RFSpot_KFC2         | -0.559                            | 0.559                                             | Hotspot         |
| 7    | Int_HS_Energy            | KFC2a               | -0.546                            | 0.546                                             | Hotspot         |
| 8    | CoreHSEnergy             | RFSpot              | -0.541                            | 0.541                                             | Hotspot         |
| 9    | Int_HS_Energy            | RFSpot              | -0.532                            | 0.532                                             | Hotspot         |
| 10   | Int_HS_Energy            | KFC2b               | -0.527                            | 0.527                                             | Hotspot         |
| 11   | HSEner_NegCoop           | RFSpot_KFC2         | -0.514                            | 0.514                                             | Hotspot         |
| 12   | No_HS                    | KFC2b               | -0.496                            | 0.496                                             | Hotspot         |
| 13   | No_HS                    | RFSpot_KFC2         | -0.496                            | 0.496                                             | Hotspot         |
| 14   | HS_PosCoop               | RFSpot              | -0.494                            | 0.494                                             | Hotspot         |
| 15   | No_HS                    | RFSpot              | -0.493                            | 0.493                                             | Hotspot         |
| 16   | SuppHSEnergy             | KFC2b               | -0.489                            | 0.489                                             | Hotspot         |
| 17   | HSEner_NegCoop           | Hotpoint1           | -0.487                            | 0.487                                             | Hotspot         |
| 18   | SuppHS                   | RFSpot              | -0.480                            | 0.480                                             | Hotspot         |
| 19   | CoreHS                   | KFC2b               | -0.476                            | 0.476                                             | Hotspot         |
| 20   | HSEner_NegCoop           | KFC2a               | -0.475                            | 0.475                                             | Hotspot         |
| 21   | Int_Energy_1             | KFC2a               | -0.472                            | 0.472                                             | Hotspot         |
| 22   | SuppHSEnergy             | RFSpot_KFC2         | -0.465                            | 0.465                                             | Hotspot         |
| 23   | HS_NegCoop               | RFSpot_KFC2         | -0.460                            | 0.460                                             | Hotspot         |
| 24   | HS_PosCoop               | RFSpot_KFC2         | -0.457                            | 0.457                                             | Hotspot         |
| 25   | AP_MPS                   | AP                  | 0.456                             | 0.456                                             | Molecular       |
| 26   | HSEner_PosCoop           | RFSpot_KFC2         | -0.444                            | 0.444                                             | Hotspot         |
| 27   | SuppHS                   | RFSpot_KFC2         | -0.441                            | 0.441                                             | Hotspot         |
| 28   | CoreHS                   | RFSpot_KFC2         | -0.440                            | 0.440                                             | Hotspot         |
| 29   | HSEner_PosCoop           | KFC2b               | -0.437                            | 0.437                                             | Hotspot         |
| 30   | No_HS                    | Hotpoint1           | -0.433                            | 0.433                                             | Hotspot         |
| 31   | Int_Energy_1             | KFC2b               | -0.432                            | 0.432                                             | Hotspot         |
| 32   | SuppHS                   | KFC2a               | -0.430                            | 0.430                                             | Hotspot         |
| 33   | No_HS                    | KFC2a               | -0.429                            | 0.429                                             | Hotspot         |
| 34   | CoreHSEnergy             | KFC2b               | -0.427                            | 0.427                                             | Hotspot         |
| 35   | CP_SKOa                  | CP                  | 0.415                             | 0.415                                             | Molecular       |
| 36   | RimHSEnergy              | Hotpoint1           | -0.415                            | 0.415                                             | Hotspot         |
| 37   | HS_NegCoop               | RFSpot              | -0.415                            | 0.415                                             | Hotspot         |
| 38   | HSEner_NegCoop           | RFSpot              | -0.414                            | 0.414                                             | Hotspot         |
| 39   | CoreHS                   | Hotpoint1           | -0.413                            | 0.413                                             | Hotspot         |
| 40   | CP_SKOb                  | CP                  | 0.391                             | 0.391                                             | Molecular       |
| 41   | SuppHSEnergy             | RFSpot              | -0.385                            | 0.385                                             | Hotspot         |
| 42   | CP_Qp                    | CP                  | 0.380                             | 0.380                                             | Molecular       |
| 43   | CP_TB                    | CP                  | 0.378                             | 0.378                                             | Molecular       |
| 44   | CHARM_gb                 | PB                  | -0.373                            | 0.373                                             | Molecular       |
| 45   | CoreHSEnergy             | KFC2a               | -0.369                            | 0.369                                             | Hotspot         |
| 46   | RimHSEnergy              | RFSpot              | -0.367                            | 0.367                                             | Hotspot         |
| 47   | CoreHSEnergy             | Hotpoint2           | -0.365                            | 0.365                                             | Hotspot         |
| 48   | HS_NegCoop               | KFC2b               | -0.356                            | 0.356                                             | Hotspot         |
| 49   | CHARM_elec               | PB                  | 0.353                             | 0.353                                             | Molecular       |
| 50   | SuppHS                   | KFC2b               | -0.344                            | 0.344                                             | Hotspot         |
| 51   | CoreHS                   | RFSpot              | -0.342                            | 0.342                                             | Hotspot         |
| 52   | CP_BT                    | CP                  | 0.337                             | 0.337                                             | Molecular       |
| 53   | HS_NegCoop               | Hotpoint1           | -0.330                            | 0.330                                             | Hotspot         |
| 54   | CP_BFKV                  | CP                  | 0.330                             | 0.330                                             | Molecular       |
| 55   | RimHSEnergy              | RFSpot_KFC2         | -0.329                            | 0.329                                             | Hotspot         |
| 56   | RimHS                    | Hotpoint1           | -0.319                            | 0.319                                             | Hotspot         |
| 57   | Int_Energy_1             | Hotpoint1           | -0.312                            | 0.312                                             | Hotspot         |
| 58   | Int_Energy_1             | Hotpoint2           | -0.312                            | 0.312                                             | Hotspot         |
| 59   | Int_HS_Energy            | Hotpoint2           | -0.312                            | 0.312                                             | Hotspot         |
| 60   | CP_MJ2                   | CP                  | 0.302                             | 0.302                                             | Molecular       |
| 61   | CP_RO                    | CP                  | -0.297                            | 0.297                                             | Molecular       |
| 62   | CP_BL                    | CP                  | 0.296                             | 0.296                                             | Molecular       |
| 63   | GEOMETRIC                | CP                  | 0.295                             | 0.295                                             | Molecular       |
| 64   | MaxClusterSize           | RFSpot_KFC2         | -0.292                            | 0.292                                             | Hotspot         |
| 65   | CP_Qm                    | CP                  | 0.291                             | 0.291                                             | Molecular       |
| 66   | Int_Energy_1             | RFSpot_KFC2         | -0.289                            | 0.289                                             | Hotspot         |
| 67   | No_Clusters              | RFSpot_KFC2         | -0.285                            | 0.285                                             | Hotspot         |
| 68   | No_Clusters              | RFSpot              | -0.284                            | 0.284                                             | Hotspot         |
| 69   | HSEner_NegCoop           | Hotpoint2           | -0.282                            | 0.282                                             | Hotspot         |
| 70   | CoreHS                   | Hotpoint2           | -0.281                            | 0.281                                             | Hotspot         |
| 71   | HSEner_PosCoop           | Hotpoint1           | -0.278                            | 0.278                                             | Hotspot         |
| 72   | OPUS_PSP2                | CP                  | 0.274                             | 0.274                                             | Molecular       |
| 73   | No_Clusters              | KFC2b               | -0.272                            | 0.272                                             | Hotspot         |
| 74   | FX1_int_kn electrostatic | PB                  | 0.268                             | 0.268                                             | Molecular       |
| 75   | FX2_kn electrostatic     | PB                  | 0.268                             | 0.268                                             | Molecular       |
| 76   | CP_SJG                   | CP                  | 0.266                             | 0.266                                             | Molecular       |
| 77   | No_HS                    | Hotpoint2           | -0.266                            | 0.266                                             | Hotspot         |
| 78   | HSEner_NegCoop           | KFC2b               | -0.260                            | 0.260                                             | Hotspot         |
| 79   | CP_TEI                   | CP                  | 0.258                             | 0.258                                             | Molecular       |
| 80   | HS_PosCoop               | Hotpoint2           | -0.256                            | 0.256                                             | Hotspot         |
| 81   | PY_fa_atr                | PB                  | 0.249                             | 0.249                                             | Molecular       |
| 82   | PY_fa_sol                | PB                  | -0.243                            | 0.243                                             | Molecular       |

## Supplementary Text S5: Descriptor Performance Measures (PCC / U-Test /AUC)

|     |                           |             |        |       |           |
|-----|---------------------------|-------------|--------|-------|-----------|
| 83  | OPUS_PSP3                 | CP          | -0.242 | 0.242 | Molecular |
| 84  | CoreHS                    | KFC2a       | -0.232 | 0.232 | Hotspot   |
| 85  | MaxClusterSize            | Hotpoint1   | -0.225 | 0.225 | Hotspot   |
| 86  | CP_GKS                    | CP          | 0.224  | 0.224 | Molecular |
| 87  | HSEner_PosCoop            | KFC2a       | -0.218 | 0.218 | Hotspot   |
| 88  | CP_RMFA                   | CP          | 0.217  | 0.217 | Molecular |
| 89  | CP_Qa                     | CP          | 0.197  | 0.197 | Molecular |
| 90  | AVG_HS_PathLength         | KFC2b       | -0.197 | 0.197 | Hotspot   |
| 91  | FX1_int_Entropy_sidec     | PB          | -0.196 | 0.196 | Molecular |
| 92  | HSEner_PosCoop            | Hotpoint2   | -0.192 | 0.192 | Hotspot   |
| 93  | FX1_int_Energy_VdW        | PB          | 0.191  | 0.191 | Molecular |
| 94  | FX2_Entropy_sidec         | PB          | -0.186 | 0.186 | Molecular |
| 95  | FX2_Energy_VdW            | PB          | 0.185  | 0.185 | Molecular |
| 96  | ACE19_SCREENing           | PB          | 0.185  | 0.185 | Molecular |
| 97  | Int_Energy_1              | RFSpot      | -0.182 | 0.182 | Hotspot   |
| 98  | RimHS                     | KFC2a       | -0.181 | 0.181 | Hotspot   |
| 99  | RimHS                     | RFSpot_KFC2 | -0.176 | 0.176 | Hotspot   |
| 100 | CP_TD                     | CP          | 0.176  | 0.176 | Molecular |
| 101 | MaxClusterSize            | RFSpot      | -0.163 | 0.163 | Hotspot   |
| 102 | SuppHSEnergy              | Hotpoint2   | -0.162 | 0.162 | Hotspot   |
| 103 | ACE19_INTERaction         | PB          | 0.159  | 0.159 | Molecular |
| 104 | SuppHS                    | Hotpoint1   | -0.156 | 0.156 | Hotspot   |
| 105 | HS_PosCoop                | KFC2b       | -0.154 | 0.154 | Hotspot   |
| 106 | FX1_int_Energy_vdwclash   | PB          | -0.154 | 0.154 | Molecular |
| 107 | SuppHSEnergy              | Hotpoint1   | -0.153 | 0.153 | Hotspot   |
| 108 | SuppHS                    | Hotpoint2   | -0.153 | 0.153 | Hotspot   |
| 109 | FX2_Energy_vdwclash       | PB          | -0.152 | 0.152 | Molecular |
| 110 | AVG_HS_PathLength         | Hotpoint1   | -0.152 | 0.152 | Hotspot   |
| 111 | DCOMPLEX                  | AP          | 0.150  | 0.150 | Molecular |
| 112 | AVG_HS_PathLength         | Hotpoint2   | -0.139 | 0.139 | Hotspot   |
| 113 | CP_HLPL                   | CP          | 0.139  | 0.139 | Molecular |
| 114 | CP_MJPL                   | CP          | 0.138  | 0.138 | Molecular |
| 115 | HS_PosCoop                | KFC2a       | -0.138 | 0.138 | Hotspot   |
| 116 | AP_T1                     | AP          | 0.134  | 0.134 | Molecular |
| 117 | CP_MS                     | CP          | 0.131  | 0.131 | Molecular |
| 118 | RimHS                     | RFSpot      | -0.128 | 0.128 | Hotspot   |
| 119 | CP_TS                     | CP          | 0.125  | 0.125 | Molecular |
| 120 | CP_SKOIP                  | CP          | 0.125  | 0.125 | Molecular |
| 121 | FX2_helix dipole          | PB          | 0.121  | 0.121 | Molecular |
| 122 | FX1_int_Entropy_mainc     | PB          | -0.119 | 0.119 | Molecular |
| 123 | FX1_int_Energy_SolvP      | PB          | -0.115 | 0.115 | Molecular |
| 124 | FX2_Energy_SolvP          | PB          | -0.113 | 0.113 | Molecular |
| 125 | FX2_Entropy_mainc         | PB          | -0.111 | 0.111 | Molecular |
| 126 | AVG_HS_PathLength         | RFSpot      | -0.110 | 0.110 | Hotspot   |
| 127 | CP_TSC                    | CP          | 0.107  | 0.107 | Molecular |
| 128 | FX1_int_helix dipole      | PB          | 0.107  | 0.107 | Molecular |
| 129 | No_Clusters               | Hotpoint1   | 0.101  | 0.101 | Hotspot   |
| 130 | RimHSEnergy               | KFC2a       | -0.100 | 0.100 | Hotspot   |
| 131 | AP_DOPE_HR                | AP          | -0.099 | 0.099 | Molecular |
| 132 | PY_hbond_sc               | PB          | 0.099  | 0.099 | Molecular |
| 133 | FX1_int_backbone_vdwclash | PB          | -0.097 | 0.097 | Molecular |
| 134 | FX2_backbone_vdwclash     | PB          | -0.094 | 0.094 | Molecular |
| 135 | MaxClusterSize            | KFC2a       | 0.094  | 0.094 | Hotspot   |
| 136 | CP_RMFCEN1                | CP          | 0.085  | 0.085 | Molecular |
| 137 | AP_DOPE                   | AP          | 0.083  | 0.083 | Molecular |
| 138 | FX2_Energy_Ionisation     | PB          | 0.079  | 0.079 | Molecular |
| 139 | FX1_int_energy_torsion    | PB          | -0.076 | 0.076 | Molecular |
| 140 | No_Clusters               | KFC2a       | -0.075 | 0.075 | Hotspot   |
| 141 | RimHS                     | Hotpoint2   | -0.071 | 0.071 | Hotspot   |
| 142 | FX1_int_Electro           | PB          | 0.071  | 0.071 | Molecular |
| 143 | No_Clusters               | Hotpoint2   | -0.069 | 0.069 | Hotspot   |
| 144 | ACE19_SELF                | PB          | -0.068 | 0.068 | Molecular |
| 145 | PY_hbond_sr_bb            | PB          | -0.067 | 0.067 | Molecular |
| 146 | AP_DARS                   | AP          | 0.067  | 0.067 | Molecular |
| 147 | FX2_energy_torsion        | PB          | -0.066 | 0.066 | Molecular |
| 148 | FX2_Electro               | PB          | 0.065  | 0.065 | Molecular |
| 149 | PY_fa_rep                 | PB          | -0.060 | 0.060 | Molecular |
| 150 | CP_MJ1                    | CP          | -0.060 | 0.060 | Molecular |
| 151 | CP_MJ3h                   | CP          | 0.054  | 0.054 | Molecular |
| 152 | NIP                       | CP          | 0.052  | 0.052 | Molecular |
| 153 | MaxClusterSize            | KFC2b       | 0.052  | 0.052 | Hotspot   |
| 154 | CP_MJ2h                   | CP          | 0.050  | 0.050 | Molecular |
| 155 | HS_NegCoop                | KFC2a       | -0.049 | 0.049 | Hotspot   |
| 156 | CHARM_total               | PB          | -0.049 | 0.049 | Molecular |
| 157 | CHARM_vdwaals             | PB          | -0.049 | 0.049 | Molecular |
| 158 | CP_TEs                    | CP          | 0.046  | 0.046 | Molecular |
| 159 | FX1_int_Energy_Ionisation | PB          | -0.044 | 0.044 | Molecular |
| 160 | DDFIRE                    | AP          | 0.044  | 0.044 | Molecular |
| 161 | FX2_Entropy Complex       | PB          | 0.042  | 0.042 | Molecular |
| 162 | PY_fa_dun                 | PB          | 0.042  | 0.042 | Molecular |
| 163 | FX1_int_Entropy Complex   | PB          | 0.042  | 0.042 | Molecular |
| 164 | ACE19_SOLVation           | PB          | 0.040  | 0.040 | Molecular |
| 165 | CP_RMFCEN2                | CP          | 0.040  | 0.040 | Molecular |
| 166 | CP_MSBM                   | CP          | 0.040  | 0.040 | Molecular |
| 167 | PY_pro_close              | PB          | 0.038  | 0.038 | Molecular |
| 168 | ACE19_HYDRophobic         | PB          | -0.038 | 0.038 | Molecular |
| 169 | AP_URS                    | AP          | 0.037  | 0.037 | Molecular |
| 170 | FX2_disulfide             | PB          | 0.035  | 0.035 | Molecular |

## Supplementary Text S5: Descriptor Performance Measures (PCC / U-Test /AUC)

|     |                                       |             |        |       |           |
|-----|---------------------------------------|-------------|--------|-------|-----------|
| 171 | CP_VD                                 | CP          | 0.035  | 0.035 | Molecular |
| 172 | FX1_int_disulfide                     | PB          | 0.034  | 0.034 | Molecular |
| 173 | FX1_int_partial covalent interactions | PB          | -0.034 | 0.034 | Molecular |
| 174 | FX1_int_water bonds                   | PB          | -0.033 | 0.033 | Molecular |
| 175 | AVG_HS_PathLength                     | KFC2a       | -0.031 | 0.031 | Hotspot   |
| 176 | FX2_water bonds                       | PB          | -0.031 | 0.031 | Molecular |
| 177 | FX2_loop_entropy                      | PB          | -0.030 | 0.030 | Molecular |
| 178 | FX1_int_SideHbond                     | PB          | -0.030 | 0.030 | Molecular |
| 179 | FX2_partial covalent interactions     | PB          | 0.030  | 0.030 | Molecular |
| 180 | DFIRE                                 | AP          | 0.027  | 0.027 | Molecular |
| 181 | FX2_SideHbond                         | PB          | -0.025 | 0.025 | Molecular |
| 182 | PY_fa_intra_rep                       | PB          | -0.023 | 0.023 | Molecular |
| 183 | CHARM_gb+sasa                         | PB          | -0.022 | 0.022 | Molecular |
| 184 | Nsc                                   | CP          | -0.022 | 0.022 | Molecular |
| 185 | PY_hbond_lr_bb                        | PB          | -0.022 | 0.022 | Molecular |
| 186 | MaxClusterSize                        | Hotpoint2   | 0.022  | 0.022 | Hotspot   |
| 187 | ACE19_SASL                            | PB          | -0.022 | 0.022 | Molecular |
| 188 | RimHSEnergy                           | Hotpoint2   | 0.020  | 0.020 | Hotspot   |
| 189 | PY_fa_pair                            | PB          | 0.018  | 0.018 | Molecular |
| 190 | FX1_int_cis_bond                      | PB          | -0.017 | 0.017 | Molecular |
| 191 | CHARM_sasa                            | PB          | -0.017 | 0.017 | Molecular |
| 192 | AVG_HS_PathLength                     | RFSpot_KFC2 | -0.016 | 0.016 | Hotspot   |
| 193 | FX2_cis_bond                          | PB          | -0.016 | 0.016 | Molecular |
| 194 | HS_NegCoop                            | Hotpoint2   | 0.013  | 0.013 | Hotspot   |
| 195 | PY_hbond_bb_sc                        | PB          | 0.013  | 0.013 | Molecular |
| 196 | HS_PosCoop                            | Hotpoint1   | -0.013 | 0.013 | Hotspot   |
| 197 | OPUS_PSP1                             | CP          | -0.010 | 0.010 | Molecular |
| 198 | FX2_Energy_SolvH                      | PB          | 0.003  | 0.003 | Molecular |
| 199 | FX1_int_Energy_SolvH                  | PB          | 0.003  | 0.003 | Molecular |
| 200 | FX1_int_BackHbond                     | PB          | -0.001 | 0.001 | Molecular |
| 201 | ACE19_COULomb                         | PB          | 0.000  | 0.000 | Molecular |
| 202 | FX2_BackHbond                         | PB          | 0.000  | 0.000 | Molecular |
| 203 | RimHSEnergy                           | KFC2b       | 0.000  | 0.000 | Hotspot   |
| 204 | RimHS                                 | KFC2b       | 0.000  | 0.000 | Hotspot   |
| 205 | FX1_int_loop_entropy                  | PB          | 0.000  | 0.000 | Molecular |
| 206 | AP_T2                                 | AP          | 0.000  | 0.000 | Molecular |

Table S7. Mann Whitney U-Test of hotspot and molecular descriptors. Two different data sets are used. Left table uses experimental data from the kinetically characterized mutations in SKEMPI which satisfy  $\Delta\log_{10}(\text{koff}) < -1$  and  $\Delta\log_{10}(\text{koff}) > 0$  (CDS1). Right table uses same experimental data but which satisfies  $|\Delta\log_{10}(\text{koff})| > 1$  (CDS2).

| [ $\Delta\log_{10}(\text{koff}) < -1$ and $\Delta\log_{10}(\text{koff}) > 0$ ] (CDS1) |                          |                     |          |                           | [ $ \Delta\log_{10}(\text{koff})  > 1$ ] (CDS2) |      |                       |                     |          |                           |                 |
|---------------------------------------------------------------------------------------|--------------------------|---------------------|----------|---------------------------|-------------------------------------------------|------|-----------------------|---------------------|----------|---------------------------|-----------------|
| Rank                                                                                  | Descriptor               | Descriptor Category | Pval     | -log <sub>10</sub> (pval) | Descriptor Type                                 | Rank | Descriptor            | Descriptor Category | Pval     | -log <sub>10</sub> (pval) | Descriptor Type |
| 1                                                                                     | HS_PosCoop               | RFSpot              | 6.84E-10 | 9.16                      | Hotspot                                         | 1    | HSener_PosCoop        | RFSpot              | 6.29E-16 | 15.20                     | Hotspot         |
| 2                                                                                     | HS_PosCoop               | RFSpot_KFC2         | 9.65E-10 | 9.02                      | Hotspot                                         | 2    | HS_PosCoop            | RFSpot_KFC2         | 3.22E-14 | 13.49                     | Hotspot         |
| 3                                                                                     | HSener_PosCoop           | RFSpot              | 1.21E-09 | 8.92                      | Hotspot                                         | 3    | HS_PosCoop            | RFSpot              | 7.26E-14 | 13.14                     | Hotspot         |
| 4                                                                                     | RimHSEnergy              | KFC2a               | 2.08E-08 | 7.68                      | Hotspot                                         | 4    | HSener_PosCoop        | RFSpot_KFC2         | 2.56E-13 | 12.59                     | Hotspot         |
| 5                                                                                     | RimHS                    | KFC2a               | 5.78E-07 | 6.24                      | Hotspot                                         | 5    | Int_HS_Energy         | RFSpot              | 9.93E-12 | 11.00                     | Hotspot         |
| 6                                                                                     | Nsc                      | CP                  | 3.68E-06 | 5.43                      | Molecular                                       | 6    | Int_HS_Energy         | Hotpoint1           | 1.86E-11 | 10.73                     | Hotspot         |
| 7                                                                                     | AP_DOPE                  | AP                  | 5.72E-06 | 5.24                      | Molecular                                       | 7    | CoreHSEnergy          | RFSpot              | 2.08E-11 | 10.68                     | Hotspot         |
| 8                                                                                     | CP_TB                    | CP                  | 8.33E-06 | 5.08                      | Molecular                                       | 8    | CoreHSEnergy          | RFSpot_KFC2         | 2.60E-11 | 10.58                     | Hotspot         |
| 9                                                                                     | AP_MPS                   | AP                  | 1.22E-05 | 4.92                      | Molecular                                       | 9    | Int_HS_Energy         | RFSpot_KFC2         | 2.88E-11 | 10.54                     | Hotspot         |
| 10                                                                                    | HSener_PosCoop           | RFSpot_KFC2         | 1.55E-05 | 4.81                      | Hotspot                                         | 10   | CoreHSEnergy          | Hotpoint1           | 1.02E-10 | 9.99                      | Hotspot         |
| 11                                                                                    | No_Clusters              | RFSpot              | 1.75E-05 | 4.76                      | Hotspot                                         | 11   | SuppHSEnergy          | KFC2a               | 2.64E-10 | 9.58                      | Hotspot         |
| 12                                                                                    | SuppHSEnergy             | KFC2a               | 4.25E-05 | 4.37                      | Hotspot                                         | 12   | AP_MPS                | 2                   | 3.46E-10 | 9.46                      | Molecular       |
| 13                                                                                    | No_HS                    | KFC2a               | 8.82E-05 | 4.05                      | Hotspot                                         | 13   | SuppHSEnergy          | RFSpot_KFC2         | 4.12E-10 | 9.38                      | Hotspot         |
| 14                                                                                    | No_HS                    | KFC2b               | 1.04E-04 | 3.99                      | Hotspot                                         | 14   | HSener_NegCoop        | Hotpoint1           | 2.40E-09 | 8.59                      | Hotspot         |
| 15                                                                                    | DFIRE                    | AP                  | 1.17E-04 | 3.86                      | Molecular                                       | 15   | No_HS                 | RFSpot              | 8.81E-09 | 8.06                      | Hotspot         |
| 16                                                                                    | CHARM_gb                 | PB                  | 1.70E-04 | 3.77                      | Molecular                                       | 16   | CP_TB                 | 1                   | 1.03E-08 | 7.99                      | Molecular       |
| 17                                                                                    | Int_HS_Energy            | RFSpot              | 1.91E-04 | 3.72                      | Hotspot                                         | 17   | ACE19_HYDRophobic     | 3                   | 2.36E-08 | 7.63                      | Molecular       |
| 18                                                                                    | ACE19_HYDRophobic        | PB                  | 2.73E-04 | 3.56                      | Molecular                                       | 18   | SuppHSEnergy          | RFSpot              | 2.51E-08 | 7.60                      | Hotspot         |
| 19                                                                                    | No_HS                    | Hotpoint2           | 2.85E-04 | 3.55                      | Hotspot                                         | 19   | No_HS                 | KFC2b               | 3.67E-08 | 7.44                      | Hotspot         |
| 20                                                                                    | Int_HS_Energy            | RFSpot_KFC2         | 2.91E-04 | 3.54                      | Hotspot                                         | 20   | HS_NegCoop            | RFSpot              | 5.65E-08 | 7.25                      | Hotspot         |
| 21                                                                                    | FX1_int_Energy_SolvH     | PB                  | 2.96E-04 | 3.53                      | Molecular                                       | 21   | No_HS                 | KFC2a               | 8.73E-08 | 7.06                      | Hotspot         |
| 22                                                                                    | FX2_Energy_SolvH         | PB                  | 3.00E-04 | 3.52                      | Molecular                                       | 22   | FX1_int_Energy_VdW    | 3                   | 9.67E-08 | 7.01                      | Molecular       |
| 23                                                                                    | CoreHSEnergy             | RFSpot              | 3.01E-04 | 3.52                      | Hotspot                                         | 23   | RimHSEnergy           | KFC2a               | 1.24E-07 | 6.90                      | Hotspot         |
| 24                                                                                    | CP_SKOb                  | CP                  | 3.60E-04 | 3.44                      | Molecular                                       | 24   | SuppHSEnergy          | KFC2b               | 1.33E-07 | 6.88                      | Hotspot         |
| 25                                                                                    | CoreHSEnergy             | RFSpot_KFC2         | 3.73E-04 | 3.43                      | Hotspot                                         | 25   | FX2_Energy_VdW        | 3                   | 1.37E-07 | 6.86                      | Molecular       |
| 26                                                                                    | CP_SKOb                  | CP                  | 3.80E-04 | 3.42                      | Molecular                                       | 26   | FX2_Energy_SolvH      | 3                   | 2.37E-07 | 6.63                      | Molecular       |
| 27                                                                                    | GEOMETRIC                | CP                  | 4.06E-04 | 3.39                      | Molecular                                       | 27   | FX1_int_Energy_SolvH  | 3                   | 2.37E-07 | 6.63                      | Molecular       |
| 28                                                                                    | CP_RMFCa                 | CP                  | 4.09E-04 | 3.39                      | Molecular                                       | 28   | HS_NegCoop            | RFSpot_KFC2         | 2.92E-07 | 6.53                      | Hotspot         |
| 29                                                                                    | AP_T2                    | AP                  | 4.34E-04 | 3.36                      | Molecular                                       | 29   | HSener_NegCoop        | RFSpot              | 3.09E-07 | 6.51                      | Hotspot         |
| 30                                                                                    | CHARM_gb+sasa            | PB                  | 4.92E-04 | 3.31                      | Molecular                                       | 30   | CP_Op                 | 1                   | 4.01E-07 | 6.40                      | Molecular       |
| 31                                                                                    | PY_fa_dun                | PB                  | 5.80E-04 | 3.23                      | Molecular                                       | 31   | SuppHS                | RFSpot              | 4.23E-07 | 6.37                      | Hotspot         |
| 32                                                                                    | PY_fa_intra_rep          | PB                  | 5.98E-04 | 3.22                      | Molecular                                       | 32   | PY_fa_atr             | 3                   | 4.40E-07 | 6.36                      | Molecular       |
| 33                                                                                    | No_Clusters              | Hotpoint2           | 6.96E-04 | 3.16                      | Hotspot                                         | 33   | No_HS                 | Hotpoint1           | 5.92E-07 | 6.23                      | Hotspot         |
| 34                                                                                    | DCOMPLEX                 | AP                  | 7.53E-04 | 3.12                      | Molecular                                       | 34   | Int_HS_Energy         | KFC2b               | 6.40E-07 | 6.19                      | Hotspot         |
| 35                                                                                    | HSener_NegCoop           | Hotpoint1           | 7.55E-04 | 3.12                      | Hotspot                                         | 35   | CP_HLPL               | 1                   | 6.56E-07 | 6.18                      | Molecular       |
| 36                                                                                    | FX1_int_Energy_VdW       | PB                  | 1.02E-03 | 2.99                      | Molecular                                       | 36   | No_Clusters           | RFSpot              | 7.90E-07 | 6.10                      | Hotspot         |
| 37                                                                                    | FX2_Energy_VdW           | PB                  | 1.22E-03 | 2.91                      | Molecular                                       | 37   | CP_SKOb               | 3                   | 1.01E-06 | 6.00                      | Molecular       |
| 38                                                                                    | CoreHSEnergy             | Hotpoint1           | 1.31E-03 | 2.88                      | Hotspot                                         | 38   | CoreHS                | KFC2b               | 1.68E-06 | 5.78                      | Hotspot         |
| 39                                                                                    | Int_Energy_1             | KFC2b               | 1.46E-03 | 2.84                      | Hotspot                                         | 39   | CP_SKOb               | 1                   | 2.21E-06 | 5.66                      | Molecular       |
| 40                                                                                    | FX2_kn_electrostatic     | PB                  | 1.72E-03 | 2.77                      | Molecular                                       | 40   | Int_Energy_1          | KFC2b               | 2.37E-06 | 5.62                      | Hotspot         |
| 41                                                                                    | CP_Dp                    | CP                  | 1.83E-03 | 2.74                      | Molecular                                       | 41   | Int_Energy_1          | KFC2a               | 2.37E-06 | 5.62                      | Hotspot         |
| 42                                                                                    | FX1_int_kn_electrostatic | PB                  | 1.95E-03 | 2.71                      | Molecular                                       | 42   | HSener_NegCoop        | RFSpot_KFC2         | 2.70E-06 | 5.57                      | Hotspot         |
| 43                                                                                    | PY_fa_atr                | PB                  | 1.97E-03 | 2.71                      | Molecular                                       | 43   | AP_DOPE               | 3                   | 2.79E-06 | 5.55                      | Molecular       |
| 44                                                                                    | SuppHSEnergy             | RFSpot_KFC2         | 2.12E-03 | 2.67                      | Hotspot                                         | 44   | CHARM_gb              | 3                   | 5.00E-06 | 5.30                      | Molecular       |
| 45                                                                                    | CoreHS                   | KFC2b               | 2.47E-03 | 2.61                      | Hotspot                                         | 45   | ACE19_SCREENING       | 3                   | 5.55E-06 | 5.26                      | Molecular       |
| 46                                                                                    | ACE19_SCREENING          | PB                  | 2.65E-03 | 2.58                      | Molecular                                       | 46   | Nsc                   | 1                   | 6.32E-06 | 5.20                      | Molecular       |
| 47                                                                                    | DFIRE                    | AP                  | 2.80E-03 | 2.55                      | Molecular                                       | 47   | ACE19_SELF            | 3                   | 8.57E-06 | 5.07                      | Molecular       |
| 48                                                                                    | RimHS                    | RFSpot              | 2.84E-03 | 2.55                      | Hotspot                                         | 48   | Int_HS_Energy         | KFC2a               | 9.79E-06 | 5.01                      | Hotspot         |
| 49                                                                                    | ACE19_SELF               | PB                  | 2.95E-03 | 2.53                      | Molecular                                       | 49   | CHARM_gb+sasa         | 3                   | 9.98E-06 | 5.00                      | Molecular       |
| 50                                                                                    | PY_fa_pair               | PB                  | 2.97E-03 | 2.53                      | Molecular                                       | 50   | CP_RMFCa              | 1                   | 1.15E-05 | 4.94                      | Molecular       |
| 51                                                                                    | Int_Energy_1             | KFC2a               | 3.25E-03 | 2.49                      | Hotspot                                         | 51   | RimHS                 | KFC2a               | 1.24E-05 | 4.91                      | Hotspot         |
| 52                                                                                    | ACE19_INTERAction        | PB                  | 3.51E-03 | 2.45                      | Molecular                                       | 52   | ACE19_INTERAction     | 3                   | 1.70E-05 | 4.77                      | Molecular       |
| 53                                                                                    | FX1_int_Entropy_sidec    | PB                  | 3.71E-03 | 2.43                      | Molecular                                       | 53   | PY_fa_dun             | 3                   | 1.72E-05 | 4.76                      | Molecular       |
| 54                                                                                    | Int_HS_Energy            | Hotpoint1           | 3.83E-03 | 2.42                      | Hotspot                                         | 54   | FX1_int_Energy_SolvP  | 3                   | 2.47E-05 | 4.61                      | Molecular       |
| 55                                                                                    | FX1_int_helix dipole     | PB                  | 4.13E-03 | 2.38                      | Molecular                                       | 55   | HS_NegCoop            | Hotpoint1           | 3.12E-05 | 4.51                      | Hotspot         |
| 56                                                                                    | FX2_Entropy_sidec        | PB                  | 4.16E-03 | 2.38                      | Molecular                                       | 56   | SuppHS                | KFC2a               | 3.96E-05 | 4.40                      | Hotspot         |
| 57                                                                                    | CP_HLPL                  | CP                  | 4.65E-03 | 2.33                      | Molecular                                       | 57   | No_HS                 | Hotpoint2           | 5.22E-05 | 4.28                      | Hotspot         |
| 58                                                                                    | CHARM_elec               | PB                  | 5.31E-03 | 2.27                      | Molecular                                       | 58   | GEOMETRIC             | 1                   | 6.13E-05 | 4.21                      | Molecular       |
| 59                                                                                    | NIP                      | CP                  | 6.30E-03 | 2.20                      | Molecular                                       | 59   | CoreHS                | Hotpoint1           | 6.51E-05 | 4.19                      | Hotspot         |
| 60                                                                                    | MaxClusterSize           | KFC2a               | 6.60E-03 | 2.18                      | Hotspot                                         | 60   | FX2_Energy_SolvP      | 3                   | 6.64E-05 | 4.18                      | Molecular       |
| 61                                                                                    | OPUS_PSP2                | CP                  | 6.88E-03 | 2.16                      | Molecular                                       | 61   | RimHSEnergy           | Hotpoint1           | 7.69E-05 | 4.11                      | Hotspot         |
| 62                                                                                    | No_HS                    | RFSpot              | 6.96E-03 | 2.16                      | Hotspot                                         | 62   | PY_fa_sol             | 3                   | 7.80E-05 | 4.11                      | Molecular       |
| 63                                                                                    | FX1_int_Energy_SolvP     | RFSpot              | 7.08E-03 | 2.15                      | Molecular                                       | 63   | FX2_backbone_vdwclash | 3                   | 8.97E-05 | 4.05                      | Molecular       |

# Supplementary Text S5: Descriptor Performance Measures (PCC / U-Test / AUC)

|     |                                       |             |          |      |           |     |                           |             |          |      |           |
|-----|---------------------------------------|-------------|----------|------|-----------|-----|---------------------------|-------------|----------|------|-----------|
| 64  | CP_TEs                                | CP          | 8.64E-03 | 2.06 | Molecular | 64  | OPUS_PSP2                 | 1           | 9.40E-05 | 4.03 | Molecular |
| 65  | SuppHSEnergy                          | KFC2b       | 9.87E-03 | 2.01 | Hotspot   | 65  | CP_Om                     | 1           | 1.04E-04 | 3.98 | Molecular |
| 66  | FX1_int_BackHbond                     | PB          | 9.93E-03 | 2.00 | Hotspot   | 66  | FX1_int_BackHbond_vdwlash | 1           | 1.05E-04 | 3.98 | Molecular |
| 67  | No_HS                                 | Hotspot1    | 1.01E-02 | 2.00 | Hotspot   | 67  | HSener_NegCoop            | KFC2a       | 1.66E-04 | 3.78 | Hotspot   |
| 68  | FX2_Energy_SolvP                      | PB          | 1.05E-02 | 1.98 | Molecular | 68  | MaxClusterSize            | Hotspot1    | 2.07E-04 | 3.68 | Hotspot   |
| 69  | HS_NegCoop                            | RFSpot      | 1.14E-02 | 1.94 | Hotspot   | 69  | CHARM_elec                | 3           | 2.19E-04 | 3.66 | Molecular |
| 70  | RimHSEnergy                           | Hotspot1    | 1.14E-02 | 1.94 | Hotspot   | 70  | HSener_NegCoop            | KFC2b       | 2.32E-04 | 3.63 | Hotspot   |
| 71  | CP_Om                                 | CP          | 1.24E-02 | 1.91 | Molecular | 71  | CP_Bl                     | 1           | 2.45E-04 | 3.61 | Molecular |
| 72  | SuppHS                                | KFC2a       | 1.28E-02 | 1.89 | Hotspot   | 72  | PY_fa_mair                | 3           | 2.71E-04 | 3.57 | Molecular |
| 73  | No_Clusters                           | RFSpot_KFC2 | 1.46E-02 | 1.83 | Hotspot   | 73  | MaxClusterSize            | RFSpot_KFC2 | 3.07E-04 | 3.51 | Hotspot   |
| 74  | FX2_backbone_vdwlash                  | PB          | 1.48E-02 | 1.83 | Molecular | 74  | FX2_kn electrostatic      | 3           | 3.75E-04 | 3.43 | Molecular |
| 75  | SuppHSEnergy                          | RFSpot      | 1.52E-02 | 1.82 | Hotspot   | 75  | No_Clusters               | RFSpot_KFC2 | 3.84E-04 | 3.42 | Hotspot   |
| 76  | PY_fa_sol                             | PB          | 1.62E-02 | 1.79 | Molecular | 76  | FX1_int_kn electrostatic  | 3           | 4.11E-04 | 3.39 | Molecular |
| 77  | AP_T1                                 | CP          | 1.75E-02 | 1.76 | Molecular | 77  | HS_NegCoop                | KFC2b       | 4.46E-04 | 3.35 | Molecular |
| 78  | FX1_int_Backbone_vdwlash              | PB          | 1.79E-02 | 1.75 | Molecular | 78  | HSener_PosCoop            | KFC2b       | 5.65E-04 | 3.25 | Hotspot   |
| 79  | No_Clusters                           | KFC2b       | 1.97E-02 | 1.71 | Hotspot   | 79  | SuppHS                    | RFSpot_KFC2 | 5.70E-04 | 3.24 | Hotspot   |
| 80  | int_HS_Energy                         | KFC2a       | 2.00E-02 | 1.70 | Hotspot   | 80  | DFIRE                     | 2           | 6.37E-04 | 3.20 | Molecular |
| 81  | CoreHS                                | Hotspot1    | 2.22E-02 | 1.65 | Hotspot   | 81  | PY_fa_rep                 | 3           | 8.08E-04 | 3.09 | Molecular |
| 82  | OPUS_PSP1                             | CP          | 2.26E-02 | 1.65 | Molecular | 82  | No_HS                     | RFSpot_KFC2 | 1.09E-03 | 2.96 | Hotspot   |
| 83  | FX2_BackHbond                         | PB          | 2.49E-02 | 1.60 | Molecular | 83  | CP_MIPL                   | 1           | 1.24E-03 | 2.91 | Molecular |
| 84  | SuppHS                                | KFC2b       | 2.57E-02 | 1.59 | Hotspot   | 84  | FX2_Entropy_sidec         | 3           | 1.28E-03 | 2.89 | Molecular |
| 85  | ACE19_SASL                            | PB          | 2.96E-02 | 1.53 | Molecular | 85  | FX1_int_Entropy_sidec     | 3           | 1.35E-03 | 2.87 | Molecular |
| 86  | CP_MSBM                               | CP          | 3.00E-02 | 1.52 | Molecular | 86  | SuppHS                    | KFC2b       | 1.51E-03 | 2.82 | Hotspot   |
| 87  | CP_SiKG                               | CP          | 3.28E-02 | 1.48 | Molecular | 87  | DDFIRE                    | 2           | 1.71E-03 | 2.77 | Molecular |
| 88  | CP_Bl                                 | CP          | 3.29E-02 | 1.48 | Molecular | 88  | SuppHSEnergy              | Hotspot2    | 1.82E-03 | 2.74 | Hotspot   |
| 89  | RimHS                                 | Hotspot1    | 3.52E-02 | 1.45 | Hotspot   | 89  | HSener_NegCoop            | Hotspot2    | 1.98E-03 | 2.70 | Hotspot   |
| 90  | HSener_NegCoop                        | RFSpot      | 3.94E-02 | 1.40 | Hotspot   | 90  | RimHS                     | Hotspot1    | 2.04E-03 | 2.69 | Hotspot   |
| 91  | int_HS_Energy                         | KFC2b       | 3.95E-02 | 1.40 | Hotspot   | 91  | MaxClusterSize            | KFC2a       | 2.06E-03 | 2.69 | Hotspot   |
| 92  | HS_NegCoop                            | RFSpot_KFC2 | 4.40E-02 | 1.36 | Hotspot   | 92  | DCOMPLEX                  | 2           | 2.07E-03 | 2.68 | Molecular |
| 93  | CP_HP                                 | CP          | 5.12E-02 | 1.29 | Molecular | 93  | CP_RD                     | 1           | 2.54E-03 | 2.59 | Molecular |
| 94  | HSener_NegCoop                        | KFC2a       | 5.71E-02 | 1.24 | Hotspot   | 94  | CoreHS                    | RFSpot      | 2.55E-03 | 2.59 | Hotspot   |
| 95  | AVG_HS_PathLength                     | Hotspot2    | 5.75E-02 | 1.24 | Hotspot   | 95  | CP_SiKG                   | 1           | 2.63E-03 | 2.58 | Molecular |
| 96  | HSener_NegCoop                        | RFSpot_KFC2 | 6.29E-02 | 1.20 | Hotspot   | 96  | RimHS                     | RFSpot      | 3.11E-03 | 2.51 | Hotspot   |
| 97  | RimHS                                 | RFSpot_KFC2 | 6.61E-02 | 1.18 | Hotspot   | 97  | MaxClusterSize            | RFSpot      | 3.17E-03 | 2.50 | Hotspot   |
| 98  | HS_NegCoop                            | KFC2b       | 6.97E-02 | 1.16 | Hotspot   | 98  | CoreHS_Energy             | KFC2b       | 3.50E-03 | 2.46 | Hotspot   |
| 99  | CP_MIPL                               | CP          | 7.23E-02 | 1.14 | Molecular | 99  | AP_T2                     | 2           | 4.52E-03 | 2.34 | Molecular |
| 100 | SuppHS                                | SuppHS      | 7.44E-02 | 1.13 | Hotspot   | 100 | CoreHS                    | KFC2a       | 4.54E-03 | 2.34 | Hotspot   |
| 101 | HS_PosCoop                            | Hotspot2    | 7.74E-02 | 1.11 | Hotspot   | 101 | CP_TS                     | 1           | 5.84E-03 | 2.23 | Molecular |
| 102 | HSener_PosCoop                        | Hotspot2    | 8.14E-02 | 1.09 | Hotspot   | 102 | ACE19_SASL                | 3           | 5.85E-03 | 2.23 | Molecular |
| 103 | CHARM_sasa                            | PB          | 9.55E-02 | 1.02 | Molecular | 103 | RimHS_Energy              | RFSpot      | 6.76E-03 | 2.17 | Hotspot   |
| 104 | PY_hbond_sr_bb                        | PB          | 9.95E-02 | 1.02 | Molecular | 104 | NIP                       | 1           | 7.15E-03 | 2.15 | Molecular |
| 105 | SuppHS                                | RFSpot      | 9.70E-02 | 1.01 | Hotspot   | 105 | CoreHS                    | RFSpot_KFC2 | 8.06E-03 | 2.09 | Hotspot   |
| 106 | MaxClusterSize                        | Hotspot1    | 1.03E-01 | 0.99 | Hotspot   | 106 | FX1_int_helix dipole      | 3           | 9.21E-03 | 2.04 | Molecular |
| 107 | SuppHSEnergy                          | Hotspot2    | 1.05E-01 | 0.98 | Hotspot   | 107 | CoreHS                    | Hotspot2    | 9.97E-03 | 2.00 | Hotspot   |
| 108 | CoreHS                                | KFC2a       | 1.08E-01 | 0.97 | Hotspot   | 108 | PY_fa_intrap_rep          | 3           | 1.32E-02 | 1.88 | Molecular |
| 109 | CP_SiKG                               | CP          | 1.11E-01 | 0.96 | Molecular | 109 | FX1_int_Energy_vdwlash    | 3           | 1.33E-02 | 1.88 | Molecular |
| 110 | PY_hbond_sc                           | PB          | 1.14E-01 | 0.94 | Molecular | 110 | CP_MSBM                   | 1           | 1.38E-02 | 1.86 | Molecular |
| 111 | CP_TD                                 | CP          | 1.19E-01 | 0.92 | Molecular | 111 | CoreHSEnergy              | Hotspot2    | 1.42E-02 | 1.85 | Hotspot   |
| 112 | CP_TS                                 | CP          | 1.21E-01 | 0.92 | Molecular | 112 | int_Energy_1              | Hotspot1    | 1.46E-02 | 1.84 | Hotspot   |
| 113 | MaxClusterSize                        | RFSpot      | 1.36E-01 | 0.87 | Hotspot   | 113 | int_Energy_1              | Hotspot2    | 1.46E-02 | 1.84 | Hotspot   |
| 114 | RimHS                                 | Hotspot2    | 1.47E-01 | 0.83 | Hotspot   | 114 | int_HS_Energy             | Hotspot2    | 1.46E-02 | 1.84 | Hotspot   |
| 115 | HSener_NegCoop                        | Hotspot1    | 1.60E-01 | 0.80 | Hotspot   | 115 | FX2_Energy_vdwlash        | 2           | 1.53E-02 | 1.82 | Molecular |
| 116 | CP_RMFCEN1                            | CP          | 1.69E-01 | 0.77 | Molecular | 116 | No_Clusters               | Hotspot2    | 1.74E-02 | 1.75 | Hotspot   |
| 117 | AP_URS                                | AP          | 1.70E-01 | 0.77 | Molecular | 117 | AVG_HS_PathLength         | Hotspot2    | 1.77E-02 | 1.76 | Hotspot   |
| 118 | HSener_PosCoop                        | KFC2b       | 1.83E-01 | 0.74 | Hotspot   | 118 | CoreHSEnergy              | KFC2a       | 1.96E-02 | 1.71 | Hotspot   |
| 119 | PY_pro_close                          | PB          | 1.94E-01 | 0.71 | Molecular | 119 | OPUS_PSP3                 | 1           | 2.10E-02 | 1.68 | Molecular |
| 120 | FX2_helix dipole                      | PB          | 2.14E-01 | 0.67 | Hotspot   | 120 | int_Energy_1              | RFSpot_KFC2 | 2.46E-02 | 1.61 | Hotspot   |
| 121 | CoreHS                                | Hotspot2    | 2.35E-01 | 0.63 | Hotspot   | 121 | SuppHSEnergy              | Hotspot1    | 3.03E-02 | 1.52 | Hotspot   |
| 122 | PY_fa_rep                             | PB          | 2.38E-01 | 0.62 | Molecular | 122 | FX1_int_BackHbond         | 3           | 3.05E-02 | 1.52 | Molecular |
| 123 | CoreHS                                | RFSpot      | 2.38E-01 | 0.62 | Hotspot   | 123 | HSener_PosCoop            | Hotspot1    | 3.35E-02 | 1.47 | Hotspot   |
| 124 | FX1_int_Energy_torsion                | PB          | 2.50E-01 | 0.60 | Molecular | 124 | CHARM_sasa                | 3           | 3.60E-02 | 1.44 | Molecular |
| 125 | HS_PosCoop                            | KFC2b       | 2.61E-01 | 0.58 | Hotspot   | 125 | FX2_BackHbond             | 3           | 3.61E-02 | 1.44 | Molecular |
| 126 | FX2_Energy_torsion                    | PB          | 2.74E-01 | 0.56 | Molecular | 126 | SuppHS                    | Hotspot2    | 4.55E-02 | 1.34 | Hotspot   |
| 127 | RimHS_Energy                          | Hotspot2    | 2.78E-01 | 0.56 | Hotspot   | 127 | SuppHS                    | Hotspot1    | 4.76E-02 | 1.32 | Hotspot   |
| 128 | AP_DARS                               | AP          | 2.97E-01 | 0.53 | Molecular | 128 | CHARM_total               | 3           | 4.77E-02 | 1.32 | Molecular |
| 129 | CP_RMFCEN2                            | CP          | 3.00E-01 | 0.52 | Molecular | 129 | No_Clusters               | KFC2b       | 5.79E-02 | 1.24 | Hotspot   |
| 130 | MaxClusterSize                        | RFSpot_KFC2 | 3.07E-01 | 0.51 | Hotspot   | 130 | CP_Mi2h                   | 1           | 6.21E-02 | 1.21 | Molecular |
| 131 | FX2_Energy_Ionisation                 | CP          | 3.07E-01 | 0.51 | Molecular | 131 | OPUS_PSP1                 | 1           | 6.58E-02 | 1.18 | Molecular |
| 132 | FX1_int_Entropy_mainc                 | PB          | 3.17E-01 | 0.50 | Hotspot   | 132 | CP_BT                     | 1           | 6.64E-02 | 1.18 | Molecular |
| 133 | CHARM_vdwaals                         | PB          | 3.19E-01 | 0.50 | Molecular | 133 | CP_BFKV                   | 1           | 6.78E-02 | 1.17 | Molecular |
| 134 | FX1_int_disulfide                     | PB          | 3.21E-01 | 0.49 | Molecular | 134 | FX2_helix dipole          | 3           | 7.25E-02 | 1.14 | Molecular |
| 135 | FX1_int_EntropyComplex                | PB          | 3.21E-01 | 0.49 | Molecular | 135 | CP_TD                     | 1           | 7.42E-02 | 1.13 | Molecular |
| 136 | FX2_EntropyComplex                    | PB          | 3.21E-01 | 0.49 | Molecular | 136 | CP_SiKG                   | 1           | 7.42E-02 | 1.13 | Molecular |
| 137 | CP_Da                                 | CP          | 3.35E-01 | 0.47 | Molecular | 137 | CP_TEs                    | 1           | 8.34E-02 | 1.08 | Molecular |
| 138 | HS_NegCoop                            | KFC2a       | 3.42E-01 | 0.47 | Hotspot   | 138 | HSener_PosCoop            | KFC2a       | 8.87E-02 | 1.05 | Hotspot   |
| 139 | RimHS_Energy                          | RFSpot_KFC2 | 3.47E-01 | 0.46 | Hotspot   | 139 | FX1_int_Entropy_mainc     | 3           | 8.95E-02 | 1.05 | Molecular |
| 140 | CP_TEI                                | CP          | 3.51E-01 | 0.45 | Molecular | 140 | FX1_int_Electro           | 3           | 9.55E-02 | 1.02 | Molecular |
| 141 | FX2_cis_bond                          | PB          | 3.66E-01 | 0.44 | Molecular | 141 | CP_TSC                    | 1           | 1.02E-01 | 0.99 | Molecular |
| 142 | HS_NegCoop                            | Hotspot1    | 3.74E-01 | 0.43 | Hotspot   | 142 | CP_GKS                    | 1           | 1.03E-01 | 0.99 | Molecular |
| 143 | CoreHSEnergy                          | Hotspot2    | 3.77E-01 | 0.42 | Hotspot   | 143 | CP_TEI                    | 1           | 1.05E-01 | 0.98 | Molecular |
| 144 | No_Clusters                           | KFC2a       | 3.89E-01 | 0.41 | Hotspot   | 144 | CP_MJ1                    | 1           | 1.06E-01 | 0.98 | Molecular |
| 145 | FX2_Entropy_mainc                     | PB          | 4.00E-01 | 0.40 | Molecular | 145 | RimHS_Energy              | RFSpot_KFC2 | 1.15E-01 | 0.94 | Hotspot   |
| 146 | FX2_loop_entropy                      | PB          | 4.13E-01 | 0.38 | Molecular | 146 | FX2_Entropy_mainc         | 2           | 1.20E-01 | 0.92 | Molecular |
| 147 | FX1_int_partial covalent interactions | PB          | 4.13E-01 | 0.38 | Molecular | 147 | HS_NegCoop                | KFC2a       | 1.24E-01 | 0.91 | Molecular |
| 148 | FX2_partial covalent interactions     | PB          | 4.13E-01 | 0.38 | Molecular | 148 | CP_RMFCEN2                | 1           | 1.31E-01 | 0.88 | Molecular |
| 149 | FX2_water bonds                       | PB          | 4.13E-01 | 0.38 | Molecular | 149 | FX1_int_Energy_Ionisation | 3           | 1.59E-01 | 0.80 | Molecular |
| 150 | FX1_int_water bonds                   | PB          | 4.13E-01 | 0.38 | Molecular | 150 | RimHS                     | Hotspot2    | 1.60E-01 | 0.80 | Hotspot   |
| 151 | CP_TSC                                | CP          | 4.30E-01 | 0.37 | Molecular | 151 | PY_hbond_bb_sc            | 3           | 1.77E-01 | 0.75 | Molecular |
| 152 | FX1_int_SideHbond                     | PB          | 4.31E-01 | 0.37 | Molecular | 152 | HS_PosCoop                | KFC2b       | 1.79E-01 | 0.75 | Hotspot   |
| 153 | MaxClusterSize                        | KFC2b       | 4.38E-01 | 0.36 | Hotspot   | 153 | PY_pro_close              | 3           | 1.88E-01 | 0.72 | Molecular |
| 154 | CoreHSEnergy                          | KFC2a       | 4.53E-01 | 0.34 | Hotspot   | 154 | FX2_Electro               | 3           | 2.03E-01 | 0.69 | Molecular |
| 155 | CP_Mi2h                               | CP          | 4.60E-01 | 0.34 | Molecular | 155 | AP_URS                    | 2           | 2.10E-01 | 0.68 | Molecular |
| 156 | CP_MJ1                                | CP          | 4.72E-01 | 0.33 | Molecular | 156 | int_Energy_1              | RFSpot      | 2.17E-01 | 0.66 | Hotspot   |
| 157 | CP_VD                                 | CP          | 4.74E-01 | 0.32 | Molecular | 157 | AP_T1                     | 2           | 2.19E-01 | 0.66 | Molecular |
| 158 | int_Energy_1                          | RFSpot      | 4.83E-01 | 0.32 | Hotspot   | 158 | CP_Da                     | 1           | 2.26E-01 | 0.63 | Molecular |
| 159 | HS_NegCoop                            | Hotspot2    | 4.92E-01 | 0.31 | Hotspot   | 159 | CP_RMFCEN1                | 1           | 2.50E-01 | 0.60 | Molecular |
| 160 | CP_BFKV                               | CP          | 4.95E-01 | 0.31 | Molecular | 160 | No_Clusters               | KFC2a       | 2.59E-01 | 0.59 | Hotspot   |
| 161 | SuppHS                                | RFSpot_KFC2 | 5.03E-01 | 0.30 | Hotspot   | 161 | PY_hbond_sc               | 3           | 2.60E-01 | 0.59 | Molecular |
| 162 | FX2_SideHbond                         | PB          | 5.11E-01 | 0.29 | Molecular | 162 | AP_DARS                   | 2           | 2.73E-01 | 0.56 | Molecular |
| 163 | HSener_NegCoop                        | KFC2b       | 5.23E-01 | 0.28 | Hotspot   | 163 | AP_DOPR_HR                | 2           | 2.75E-01 | 0.56 | Molecular |
| 164 | HSener_PosCoop                        | KFC2a       | 5.56E-01 | 0.25 | Hotspot   | 164 | HS_PosCoop                | KFC2a       | 3.03E-01 | 0.52 | Hotspot   |
| 165 | No_Clusters                           | Hotspot1    | 5.63E-01 | 0.25 | Hotspot   | 165 | No_Clusters               | Hotspot1    | 3.07E-01 | 0.51 | Hotspot   |
| 166 | FX1_int_Electro                       | PB          | 5.90E-01 | 0.23 | Molecular | 166 | CP_MJ2                    | 1           | 3.40E-01 | 0.47 | Molecular |
| 167 | RimHS_Energy                          | RFSpot      | 6.25E-01 | 0.20 | Hotspot   | 167 | CHARM_vdwaals             | 3           | 3.47E-01 | 0.46 | Molecular |
| 168 | ACE19_SOLVation                       | PB          | 6.27E-01 | 0.20 | Molecular | 168 | CP_MS                     | 1           | 3.95E-01 | 0.40 | Molecular |
| 169 | CP_MS                                 | CP          | 6.29E-01 | 0.20 | Molecular | 169 | CP_Mi3h                   | 1           | 4.75E-01 | 0.32 | Molecular |
| 170 | SuppHS                                | Hotspot1    | 6.33E-01 | 0.20 | Hotspot   | 170 | FX2_Energy_torsion        | 3           | 4.84E-01 | 0.32 | Molecular |
| 171 | FX1_int_Energy_Ionisation             | PB          | 6.33E-01 | 0.20 | Molecular | 171 | MaxClusterSize            | KFC2b       | 5.19E-01 | 0.28 | Hotspot   |
| 172 | No_HS                                 | RFSpot_KFC2 | 6.45E-01 | 0.19 | Hotspot   | 172 | FX1_int_Energy_torsion    | 3           | 5.49E-01 | 0.26 | Molecular |
| 173 | int_Energy_1                          | Hotspot1    | 6.51E-01 | 0.19 | Hotspot   | 173 | HS_PosCoop                | Hotspot1    | 5.84E-01 | 0.23 | Hotspot   |
| 174 | int_Energy_1                          | Hotspot2    | 6.51E-01 | 0.19 | Hotspot   | 174 | FX2_SideHbond             | 3           | 5.92E-01 | 0.23 | Hotspot   |
| 175 | int_HS_Energy                         | Hotspot2    | 6.51E-01 | 0.19 | Hotspot   | 175 | FX1_int_disulfide         | 3           | 5.95E-01 | 0.23 | Molecular |

## Supplementary Text S5: Descriptor Performance Measures (PCC / U-Test / AUC)

|     |                         |             |          |      |           |     |                                       |             |     |      |           |
|-----|-------------------------|-------------|----------|------|-----------|-----|---------------------------------------|-------------|-----|------|-----------|
| 196 | HSener_PosCoop          | Hotpoint1   | 9.66E-01 | 0.02 | Hotspot   | 196 | RimHSEnergy                           | KFC2b       | NaN | 0.00 | Hotspot   |
| 197 | AP_DOPE_HR              | AP          | 9.66E-01 | 0.01 | Molecular | 197 | RimHS                                 | KFC2b       | NaN | 0.00 | Hotspot   |
| 198 | FX1_int_Energy_vdwclash | PB          | 9.66E-01 | 0.00 | Molecular | 198 | AVG_HS_PathLength                     | RFSpot      | NaN | 0.00 | Hotspot   |
| 199 | FX1_int_loop_entropy    | PB          | NaN      | 0.00 | Molecular | 199 | AVG_HS_PathLength                     | RFSpot_KFC2 | NaN | 0.00 | Hotspot   |
| 200 | AVG_HS_PathLength       | Hotpoint1   | NaN      | 0.00 | Hotspot   | 200 | FX1_int_water_bonds                   | 3           | NaN | 0.00 | Molecular |
| 201 | AVG_HS_PathLength       | KFC2a       | NaN      | 0.00 | Hotspot   | 201 | FX1_int_loop_entropy                  | 3           | NaN | 0.00 | Molecular |
| 202 | AVG_HS_PathLength       | KFC2b       | NaN      | 0.00 | Hotspot   | 202 | FX1_int_cis_bond                      | 3           | NaN | 0.00 | Molecular |
| 203 | RimHSEnergy             | KFC2b       | NaN      | 0.00 | Hotspot   | 203 | FX1_int_partial_covalent_interactions | 3           | NaN | 0.00 | Molecular |
| 204 | RimHS                   | KFC2b       | NaN      | 0.00 | Hotspot   | 204 | FX2_water_bonds                       | 3           | NaN | 0.00 | Molecular |
| 205 | AVG_HS_PathLength       | RFSpot      | NaN      | 0.00 | Hotspot   | 205 | FX2_loop_entropy                      | 3           | NaN | 0.00 | Molecular |
| 206 | AVG_HS_PathLength       | RFSpot_KFC2 | NaN      | 0.00 | Hotspot   | 206 | FX2_partial_covalent_interactions     | 3           | NaN | 0.00 | Molecular |

Table S8. Area under Curve (AUC) of hotspot and molecular descriptors. Two different data sets are used. Left table uses experimental data from the kinetically characterized mutations in SKEMPI which satisfy  $\Delta\log_{10}(\text{koff}) < -1$  and  $\Delta\log_{10}(\text{koff}) > 0$  (CDS1). Right table uses same experimental data but which satisfies  $|\Delta\log_{10}(\text{koff})| > 1$  (CDS2).

| $\Delta\log_{10}(\text{koff}) < -1$ and $\Delta\log_{10}(\text{koff}) > 0$ (CDS1) |                          |                     |                 |                 | $ \Delta\log_{10}(\text{koff})  > 1$ (CDS2). |                          |                     |                 |                 |
|-----------------------------------------------------------------------------------|--------------------------|---------------------|-----------------|-----------------|----------------------------------------------|--------------------------|---------------------|-----------------|-----------------|
| Rank                                                                              | Descriptor               | Descriptor Category | AUC Stabilizing | Descriptor Type | Rank                                         | Descriptor               | Descriptor Category | AUC Stabilizing | Descriptor Type |
| 1                                                                                 | HS_PosCoop               | RFSpot              | 0.830           | Hotspot         | 1                                            | HSener_PosCoop           | RFSpot              | 0.949           | Hotspot         |
| 2                                                                                 | HS_PosCoop               | RFSpot_KFC2         | 0.827           | Hotspot         | 2                                            | HS_PosCoop               | RFSpot_KFC2         | 0.921           | Hotspot         |
| 3                                                                                 | HSener_PosCoop           | RFSpot              | 0.825           | Hotspot         | 3                                            | HS_PosCoop               | RFSpot              | 0.916           | Hotspot         |
| 4                                                                                 | NSC                      | CP                  | 0.746           | Molecular       | 4                                            | HSener_PosCoop           | RFSpot_KFC2         | 0.906           | Hotspot         |
| 5                                                                                 | AP_DOPE                  | AP                  | 0.742           | Molecular       | 5                                            | Int_HS_Energy            | RFSpot              | 0.878           | Hotspot         |
| 6                                                                                 | CP_TB                    | CP                  | 0.738           | Molecular       | 6                                            | Int_HS_Energy            | Hotpoint1           | 0.874           | Hotspot         |
| 7                                                                                 | AP_MPS                   | AP                  | 0.732           | Molecular       | 7                                            | CoreHSEnergy             | RFSpot              | 0.872           | Hotspot         |
| 8                                                                                 | HSener_PosCoop           | RFSpot_KFC2         | 0.731           | Hotspot         | 8                                            | CoreHSEnergy             | RFSpot_KFC2         | 0.871           | Hotspot         |
| 9                                                                                 | SuppHSEnergy             | KFC2a               | 0.718           | Hotspot         | 9                                            | Int_HS_Energy            | RFSpot_KFC2         | 0.870           | Hotspot         |
| 10                                                                                | RimHSEnergy              | KFC2a               | 0.710           | Hotspot         | 10                                           | CoreHSEnergy             | Hotpoint1           | 0.860           | Hotspot         |
| 11                                                                                | No_Clusters              | RFSpot              | 0.709           | Hotspot         | 11                                           | SuppHSEnergy             | KFC2a               | 0.851           | Hotspot         |
| 12                                                                                | DFIRE                    | AP                  | 0.704           | Molecular       | 12                                           | AP_MPS                   | AP                  | 0.849           | Molecular       |
| 13                                                                                | No_HS                    | KFC2a               | 0.704           | Hotspot         | 13                                           | SuppHSEnergy             | RFSpot_KFC2         | 0.847           | Hotspot         |
| 14                                                                                | Int_HS_Energy            | RFSpot              | 0.699           | Hotspot         | 14                                           | HSener_NegCoop           | Hotpoint1           | 0.831           | Hotspot         |
| 15                                                                                | No_HS                    | KFC2b               | 0.695           | Hotspot         | 15                                           | CP_TB                    | CP                  | 0.818           | Molecular       |
| 16                                                                                | ACE19_HYDROphobic        | PB                  | 0.694           | Molecular       | 16                                           | No_HS                    | RFSpot              | 0.817           | Hotspot         |
| 17                                                                                | Int_HS_Energy            | RFSpot_KFC2         | 0.694           | Hotspot         | 17                                           | SuppHSEnergy             | RFSpot              | 0.811           | Hotspot         |
| 18                                                                                | FX1_int_Energy_SolvH     | PB                  | 0.693           | Molecular       | 18                                           | ACE19_HYDROphobic        | PB                  | 0.810           | Molecular       |
| 19                                                                                | FX2_Energy_SolvH         | PB                  | 0.693           | Molecular       | 19                                           | HS_NegCoop               | RFSpot              | 0.802           | Hotspot         |
| 20                                                                                | CoreHSEnergy             | RFSpot              | 0.693           | Hotspot         | 20                                           | No_HS                    | KFC2b               | 0.801           | Hotspot         |
| 21                                                                                | CoreHSEnergy             | RFSpot_KFC2         | 0.690           | Hotspot         | 21                                           | FX1_int_Energy_VdW       | PB                  | 0.796           | Molecular       |
| 22                                                                                | CP_SKOb                  | CP                  | 0.690           | Molecular       | 22                                           | No_HS                    | KFC2a               | 0.794           | Hotspot         |
| 23                                                                                | GEOMETRIC                | CP                  | 0.689           | Molecular       | 23                                           | FX2_Energy_VdW           | PB                  | 0.793           | Molecular       |
| 24                                                                                | CP_SKOa                  | CP                  | 0.689           | Molecular       | 24                                           | SuppHSEnergy             | KFC2b               | 0.793           | Hotspot         |
| 25                                                                                | CP_RMFA                  | CP                  | 0.689           | Molecular       | 25                                           | FX2_Energy_SolvH         | PB                  | 0.787           | Molecular       |
| 26                                                                                | AP_T2                    | AP                  | 0.688           | Molecular       | 26                                           | FX1_int_Energy_SolvH     | PB                  | 0.787           | Molecular       |
| 27                                                                                | No_HS                    | Hotpoint2           | 0.685           | Hotspot         | 27                                           | HS_NegCoop               | RFSpot_KFC2         | 0.785           | Hotspot         |
| 28                                                                                | PY_fa_dun                | PB                  | 0.683           | Molecular       | 28                                           | HSener_NegCoop           | RFSpot              | 0.784           | Hotspot         |
| 29                                                                                | PY_fa_intra_rep          | PB                  | 0.682           | Molecular       | 29                                           | CP_Op                    | CP                  | 0.782           | Molecular       |
| 30                                                                                | DCOMPLEX                 | AP                  | 0.680           | Molecular       | 30                                           | PY_fa_atr                | PB                  | 0.781           | Molecular       |
| 31                                                                                | HSener_NegCoop           | Hotpoint1           | 0.680           | Hotspot         | 31                                           | Int_HS_Energy            | KFC2b               | 0.777           | Hotspot         |
| 32                                                                                | FX1_int_Energy_VdW       | PB                  | 0.676           | Molecular       | 32                                           | CP_HLPL                  | CP                  | 0.776           | Molecular       |
| 33                                                                                | FX2_Energy_VdW           | PB                  | 0.673           | Molecular       | 33                                           | SuppHS                   | RFSpot              | 0.776           | Hotspot         |
| 34                                                                                | CoreHSEnergy             | Hotpoint1           | 0.671           | Hotspot         | 34                                           | No_HS                    | Hotpoint1           | 0.773           | Hotspot         |
| 35                                                                                | Int_Energy_1             | KFC2b               | 0.670           | Hotspot         | 35                                           | CP_SKOb                  | CP                  | 0.772           | Molecular       |
| 36                                                                                | FX2_kn_electrostatic     | PB                  | 0.667           | Molecular       | 36                                           | CP_SKOa                  | CP                  | 0.764           | Molecular       |
| 37                                                                                | CP_Op                    | CP                  | 0.666           | Molecular       | 37                                           | Int_Energy_1             | KFC2b               | 0.763           | Hotspot         |
| 38                                                                                | PY_fa_atr                | PB                  | 0.665           | Molecular       | 38                                           | No_Clusters              | RFSpot              | 0.763           | Hotspot         |
| 39                                                                                | FX1_int_kn_electrostatic | PB                  | 0.665           | Molecular       | 39                                           | Int_Energy_1             | KFC2a               | 0.762           | Hotspot         |
| 40                                                                                | SuppHSEnergy             | RFSpot_KFC2         | 0.664           | Hotspot         | 40                                           | HSener_NegCoop           | RFSpot_KFC2         | 0.761           | Hotspot         |
| 41                                                                                | ACE19_SCREENing          | PB                  | 0.661           | Molecular       | 41                                           | AP_DOPE                  | AP                  | 0.761           | Molecular       |
| 42                                                                                | DFIRE                    | AP                  | 0.660           | Molecular       | 42                                           | ACE19_SCREENing          | PB                  | 0.753           | Hotspot         |
| 43                                                                                | PY_fa_pair               | PB                  | 0.659           | Molecular       | 43                                           | NSC                      | CP                  | 0.750           | Molecular       |
| 44                                                                                | Int_Energy_1             | KFC2a               | 0.657           | Hotspot         | 44                                           | CoreHS                   | KFC2b               | 0.750           | Hotspot         |
| 45                                                                                | ACE19_INTERaction        | PB                  | 0.656           | Molecular       | 45                                           | Int_HS_Energy            | KFC2a               | 0.746           | Hotspot         |
| 46                                                                                | Int_HS_Energy            | Hotpoint1           | 0.654           | Hotspot         | 46                                           | CP_RMFA                  | CP                  | 0.744           | Molecular       |
| 47                                                                                | CP_HLPL                  | CP                  | 0.651           | Molecular       | 47                                           | ACE19_INTERaction        | PB                  | 0.739           | Hotspot         |
| 48                                                                                | CHARM_elec               | PB                  | 0.649           | Molecular       | 48                                           | PY_fa_dun                | PB                  | 0.738           | Molecular       |
| 49                                                                                | No_Clusters              | Hotpoint2           | 0.647           | Hotspot         | 49                                           | HS_NegCoop               | Hotpoint1           | 0.731           | Hotspot         |
| 50                                                                                | FX1_int_helix_dipole     | PB                  | 0.647           | Molecular       | 50                                           | GEOMETRIC                | CP                  | 0.723           | Molecular       |
| 51                                                                                | OPUS_PSP2                | CP                  | 0.644           | Molecular       | 51                                           | No_HS                    | Hotpoint2           | 0.721           | Hotspot         |
| 52                                                                                | NIP                      | CP                  | 0.644           | Molecular       | 52                                           | SuppHS                   | KFC2a               | 0.720           | Hotspot         |
| 53                                                                                | No_HS                    | RFSpot              | 0.642           | Hotspot         | 53                                           | OPUS_PSP2                | CP                  | 0.718           | Molecular       |
| 54                                                                                | RimHS                    | KFC2a               | 0.642           | Hotspot         | 54                                           | CoreHS                   | Hotpoint1           | 0.716           | Hotspot         |
| 55                                                                                | CoreHS                   | KFC2b               | 0.638           | Hotspot         | 55                                           | CP_Qm                    | CP                  | 0.716           | Molecular       |
| 56                                                                                | FX1_int_BackHbond        | PB                  | 0.638           | Molecular       | 56                                           | HSener_NegCoop           | KFC2a               | 0.709           | Hotspot         |
| 57                                                                                | SuppHSEnergy             | KFC2b               | 0.637           | Hotspot         | 57                                           | CHARM_elec               | PB                  | 0.706           | Molecular       |
| 58                                                                                | HS_NegCoop               | RFSpot              | 0.635           | Hotspot         | 58                                           | HSener_NegCoop           | KFC2b               | 0.705           | Hotspot         |
| 59                                                                                | No_HS                    | Hotpoint1           | 0.634           | Hotspot         | 59                                           | MaxClusterSize           | Hotpoint1           | 0.705           | Hotspot         |
| 60                                                                                | CP_Qm                    | CP                  | 0.633           | Molecular       | 60                                           | CP_BL                    | CP                  | 0.704           | Molecular       |
| 61                                                                                | SuppHSEnergy             | RFSpot              | 0.628           | Hotspot         | 61                                           | PY_fa_pair               | PB                  | 0.702           | Molecular       |
| 62                                                                                | AP_T1                    | AP                  | 0.627           | Molecular       | 62                                           | FX2_kn_electrostatic     | PB                  | 0.697           | Molecular       |
| 63                                                                                | Int_HS_Energy            | KFC2a               | 0.624           | Hotspot         | 63                                           | MaxClusterSize           | RFSpot_KFC2         | 0.696           | Hotspot         |
| 64                                                                                | OPUS_PSP1                | CP                  | 0.622           | Molecular       | 64                                           | FX1_int_kn_electrostatic | PB                  | 0.696           | Molecular       |
| 65                                                                                | SuppHS                   | KFC2a               | 0.622           | Hotspot         | 65                                           | HS_NegCoop               | KFC2b               | 0.695           | Hotspot         |
| 66                                                                                | No_Clusters              | RFSpot_KFC2         | 0.620           | Hotspot         | 66                                           | HSener_PosCoop           | KFC2b               | 0.692           | Hotspot         |
| 67                                                                                | AVG_HS_PathLength        | KFC2a               | 0.620           | Hotspot         | 67                                           | DFIRE                    | AP                  | 0.689           | Molecular       |
| 68                                                                                | FX2_BackHbond            | PB                  | 0.620           | Molecular       | 68                                           | RimHSEnergy              | Hotpoint1           | 0.688           | Hotspot         |
| 69                                                                                | CoreHS                   | Hotpoint1           | 0.616           | Hotspot         | 69                                           | No_Clusters              | RFSpot_KFC2         | 0.688           | Hotspot         |
| 70                                                                                | CP_MSBM                  | CP                  | 0.615           | Molecular       | 70                                           | SuppHS                   | RFSpot_KFC2         | 0.686           | Hotspot         |
| 71                                                                                | CP_SiKG                  | CP                  | 0.614           | Molecular       | 71                                           | No_HS                    | RFSpot_KFC2         | 0.680           | Hotspot         |
| 72                                                                                | CP_BL                    | CP                  | 0.613           | Molecular       | 72                                           | CP_MJPL                  | CP                  | 0.679           | Molecular       |
| 73                                                                                | Int_HS_Energy            | KFC2b               | 0.610           | Hotspot         | 73                                           | DFIRE                    | AP                  | 0.674           | Molecular       |
| 74                                                                                | HSener_NegCoop           | RFSpot              | 0.610           | Hotspot         | 74                                           | SuppHSEnergy             | Hotpoint2           | 0.673           | Hotspot         |
| 75                                                                                | RimHS                    | RFSpot              | 0.608           | Hotspot         | 75                                           | HSener_NegCoop           | Hotpoint2           | 0.672           | Hotspot         |
| 76                                                                                | HS_NegCoop               | RFSpot_KFC2         | 0.608           | Hotspot         | 76                                           | DCOMPLEX                 | AP                  | 0.672           | Molecular       |
| 77                                                                                | AVG_HS_PathLength        | Hotpoint2           | 0.607           | Hotspot         | 77                                           | SuppHS                   | KFC2b               | 0.668           | Hotspot         |
| 78                                                                                | HSener_NegCoop           | KFC2a               | 0.603           | Hotspot         | 78                                           | CP_SiKG                  | CP                  | 0.668           | Molecular       |
| 79                                                                                | SuppHS                   | KFC2b               | 0.603           | Hotspot         | 79                                           | CoreHS                   | RFSpot              | 0.664           | Hotspot         |
| 80                                                                                | HSener_NegCoop           | RFSpot_KFC2         | 0.599           | Hotspot         | 80                                           | CoreHSEnergy             | KFC2b               | 0.662           | Hotspot         |
| 81                                                                                | No_Clusters              | KFC2b               | 0.598           | Hotspot         | 81                                           | AP_T2                    | AP                  | 0.658           | Molecular       |
| 82                                                                                | HS_NegCoop               | KFC2b               | 0.596           | Hotspot         | 82                                           | MaxClusterSize           | RFSpot              | 0.658           | Hotspot         |
| 83                                                                                | CP_MJPL                  | CP                  | 0.595           | Molecular       | 83                                           | RimHSEnergy              | KFC2a               | 0.656           | Hotspot         |
| 84                                                                                | RimHSEnergy              | Hotpoint1           | 0.595           | Hotspot         | 84                                           | CP_TS                    | CP                  | 0.654           | Molecular       |
| 85                                                                                | CHARM_sasa               | PB                  | 0.589           | Molecular       | 85                                           | CoreHS                   | KFC2a               | 0.649           | Molecular       |
| 86                                                                                | PY_hbond_bb_sc           | PB                  | 0.588           | Molecular       | 86                                           | NIP                      | CP                  | 0.649           | Molecular       |
| 87                                                                                | SuppHSEnergy             | Hotpoint2           | 0.586           | Hotspot         | 87                                           | RimHSEnergy              | RFSpot              | 0.648           | Hotspot         |
| 88                                                                                | MaxClusterSize           | Hotpoint1           | 0.586           | Hotspot         | 88                                           | CoreHS                   | RFSpot_KFC2         | 0.646           | Hotspot         |
| 89                                                                                | CP_SKOIP                 | CP                  | 0.585           | Molecular       | 89                                           | FX1_int_helix_dipole     | PB                  | 0.643           | Molecular       |
| 90                                                                                | SuppHS                   | RFSpot              | 0.583           | Hotspot         | 90                                           | RimHS                    | KFC2a               | 0.641           | Hotspot         |
| 91                                                                                | CP_TD                    | CP                  | 0.583           | Molecular       | 91                                           | PY_fa_intra_rep          | PB                  | 0.638           | Molecular       |
| 92                                                                                | CP_TS                    | CP                  | 0.583           | Molecular       | 92                                           | CP_MSBM                  | CP                  | 0.637           | Molecular       |
| 93                                                                                | SuppHS                   | Hotpoint2           | 0.582           | Hotspot         | 93                                           | CoreHSEnergy             | Hotpoint2           | 0.637           | Hotspot         |
| 94                                                                                | CoreHS                   | KFC2a               | 0.579           | Hotspot         | 94                                           | Int_Energy_1             | Hotpoint1           | 0.636           | Hotspot         |
| 95                                                                                | MaxClusterSize           | RFSpot              | 0.579           | Hotspot         | 95                                           | Int_Energy_1             | Hotpoint2           | 0.636           | Hotspot         |
| 96                                                                                | HSener_NegCoop           | Hotpoint2           | 0.575           | Hotspot         | 96                                           | Int_HS_Energy            | Hotpoint2           | 0.636           | Hotspot         |
| 97                                                                                | AP_URS                   | AP                  | 0.573           | Molecular       | 97                                           | RimHS                    | RFSpot              | 0.634           | Hotspot         |
| 98                                                                                | CP_RMFCEN1               | CP                  | 0.573           | Molecular       | 98                                           | AVG_HS_PathLength        | Hotpoint2           | 0.632           | Hotspot         |
| 99                                                                                | HSener_PosCoop           | KFC2b               | 0.571           | Hotspot         | 99                                           | CoreHSEnergy             | KFC2a               | 0.630           | Hotspot         |
| 100                                                                               | FX2_helix_dipole         | PB                  | 0.566           | Molecular       | 100                                          | CoreHS                   | Hotpoint2           | 0.629           | Hotspot         |
| 101                                                                               | RimHS                    | Hotpoint2           | 0.561           | Hotspot         | 101                                          | Int_Energy_1             | RFSpot_KFC2         | 0.625           | Hotspot         |
| 102                                                                               | RimHS                    | Hotpoint1           | 0.560           | Hotspot         | 102                                          | SuppHSEnergy             | Hotpoint1           | 0.623           | Hotspot         |
| 103                                                                               | FX1_int_energy_torsion   | PB                  | 0.560           | Molecular       | 103                                          | FX1_int_BackHbond        | PB                  | 0.621           | Molecular       |
| 104                                                                               | CoreHS                   | RFSpot              | 0.560           | Hotspot         | 104                                          | RimHS                    | Hotpoint1           | 0.618           | Hotspot         |
| 105                                                                               | HS_PosCoop               | KFC2b               | 0.560           | Hotspot         | 105                                          | HSener_PosCoop           | Hotpoint1           | 0.618           | Hotspot         |
| 106                                                                               | FX2_energy_torsion       | PB                  | 0.558           | Molecular       | 106                                          | No_Clusters              | Hotpoint2           | 0.618           | Hotspot         |

## Supplementary Text S5: Descriptor Performance Measures (PCC / U-Test /AUC)

|     |                                       |             |       |           |     |                                       |             |       |           |
|-----|---------------------------------------|-------------|-------|-----------|-----|---------------------------------------|-------------|-------|-----------|
| 107 | AP_DARS                               | AP          | 0.556 | Molecular | 107 | CHARM_sasa                            | PB          | 0.617 | Molecular |
| 108 | CP_RMFCE2                             | CP          | 0.555 | Molecular | 108 | FX2_BackHbond                         | PB          | 0.617 | Molecular |
| 109 | MaxClusterSize                        | RFSpot_KFC2 | 0.554 | Hotspot   | 109 | AVG_HS_PathLength                     | KFC2a       | 0.611 | Hotspot   |
| 110 | CoreHS                                | Hotpoint2   | 0.553 | Hotspot   | 110 | CP_MJ2h                               | CP          | 0.604 | Molecular |
| 111 | CHARM_vdwaals                         | PB          | 0.553 | Molecular | 111 | SuppHS                                | Hotpoint2   | 0.604 | Hotspot   |
| 112 | CP_Qa                                 | CP          | 0.551 | Molecular | 112 | OPUS_PSP1                             | CP          | 0.602 | Molecular |
| 113 | CP_TEI                                | CP          | 0.550 | Molecular | 113 | CP_BFKV                               | CP          | 0.602 | Molecular |
| 114 | HS_NegCoop                            | KFC2a       | 0.548 | Hotspot   | 114 | CP_BT                                 | CP          | 0.601 | Molecular |
| 115 | CoreHSEnergy                          | Hotpoint2   | 0.547 | Hotspot   | 115 | SuppHS                                | Hotpoint1   | 0.600 | Hotspot   |
| 116 | HS_NegCoop                            | Hotpoint1   | 0.547 | Hotspot   | 116 | FX2_helix dipole                      | PB          | 0.600 | Molecular |
| 117 | FX2_Energy_Ionisation                 | PB          | 0.545 | Molecular | 117 | CP_SKOIP                              | CP          | 0.599 | Molecular |
| 118 | FX1_int_SideHbond                     | PB          | 0.542 | Molecular | 118 | CP_TD                                 | CP          | 0.599 | Molecular |
| 119 | MaxClusterSize                        | KFC2b       | 0.541 | Hotspot   | 119 | No_Clusters                           | KFC2b       | 0.597 | Hotspot   |
| 120 | CoreHSEnergy                          | KFC2a       | 0.540 | Hotspot   | 120 | HSener_PosCoop                        | KFC2a       | 0.595 | Hotspot   |
| 121 | No_Clusters                           | KFC2a       | 0.540 | Hotspot   | 121 | FX1_int_Electro                       | PB          | 0.593 | Molecular |
| 122 | CP_MJ2h                               | CP          | 0.539 | Molecular | 122 | CP_TSC                                | CP          | 0.591 | Molecular |
| 123 | CP_BFKV                               | CP          | 0.536 | Molecular | 123 | CP_GKS                                | CP          | 0.590 | Molecular |
| 124 | FX2_SideHbond                         | PB          | 0.535 | Molecular | 124 | CP_TEI                                | CP          | 0.590 | Molecular |
| 125 | SuppHS                                | RFSpot_KFC2 | 0.533 | Hotspot   | 125 | HS_NegCoop                            | KFC2a       | 0.585 | Hotspot   |
| 126 | HSener_NegCoop                        | KFC2b       | 0.532 | Hotspot   | 126 | RimHSenergy                           | RFSpot_KFC2 | 0.585 | Hotspot   |
| 127 | HSener_PosCoop                        | KFC2a       | 0.531 | Hotspot   | 127 | CP_RMFCE2                             | CP          | 0.584 | Molecular |
| 128 | FX1_int_Electro                       | PB          | 0.529 | Molecular | 128 | PY_hbond_bb_sc                        | PB          | 0.575 | Molecular |
| 129 | RimHSenergy                           | RFSpot      | 0.525 | Hotspot   | 129 | HS_PosCoop                            | KFC2b       | 0.574 | Hotspot   |
| 130 | No_HS                                 | RFSpot_KFC2 | 0.524 | Hotspot   | 130 | FX2_Electro                           | PB          | 0.571 | Molecular |
| 131 | HS_PosCoop                            | KFC2a       | 0.523 | Hotspot   | 131 | AP_URS                                | AP          | 0.570 | Molecular |
| 132 | SuppHS                                | Hotpoint1   | 0.522 | Hotspot   | 132 | Int_Energy_1                          | RFSpot      | 0.569 | Hotspot   |
| 133 | Int_Energy_1                          | RFSpot_KFC2 | 0.519 | Hotspot   | 133 | AP_T1                                 | AP          | 0.568 | Molecular |
| 134 | CP_BT                                 | CP          | 0.516 | Molecular | 134 | CP_Qa                                 | CP          | 0.566 | Molecular |
| 135 | CP_MJ3h                               | CP          | 0.515 | Molecular | 135 | CP_RMFCE1                             | CP          | 0.564 | Molecular |
| 136 | CoreHSEnergy                          | KFC2b       | 0.515 | Hotspot   | 136 | AP_DARS                               | AP          | 0.561 | Molecular |
| 137 | CoreHS                                | RFSpot_KFC2 | 0.515 | Hotspot   | 137 | RimHS                                 | Hotpoint2   | 0.559 | Hotspot   |
| 138 | OPUS_PSP3                             | CP          | 0.513 | Molecular | 138 | No_Clusters                           | KFC2a       | 0.557 | Hotspot   |
| 139 | FX1_int_water bonds                   | PB          | 0.511 | Molecular | 139 | HS_PosCoop                            | KFC2a       | 0.557 | Hotspot   |
| 140 | FX1_int_partial covalent interactions | PB          | 0.511 | Molecular | 140 | CP_MJ2                                | CP          | 0.552 | Molecular |
| 141 | FX2_water bonds                       | PB          | 0.511 | Molecular | 141 | CP_MS                                 | CP          | 0.548 | Molecular |
| 142 | FX2_loop_entropy                      | PB          | 0.511 | Molecular | 142 | CP_MJ3h                               | CP          | 0.540 | Molecular |
| 143 | FX2_Electro                           | PB          | 0.506 | Molecular | 143 | MaxClusterSize                        | KFC2b       | 0.535 | Hotspot   |
| 144 | ACE19_COULomb                         | PB          | 0.505 | Molecular | 144 | FX2_SideHbond                         | PB          | 0.530 | Molecular |
| 145 | CHARM_total                           | PB          | 0.503 | Molecular | 145 | HS_PosCoop                            | Hotpoint2   | 0.526 | Hotspot   |
| 146 | FX1_int_cis_bond                      | PB          | 0.501 | Molecular | 146 | FX1_int_SideHbond                     | PB          | 0.524 | Molecular |
| 147 | FX1_int_loop_entropy                  | PB          | 0.500 | Molecular | 147 | CP_VD                                 | CP          | 0.512 | Molecular |
| 148 | RimHSenergy                           | KFC2b       | 0.500 | Hotspot   | 148 | ACE19_COULomb                         | PB          | 0.511 | Molecular |
| 149 | RimHS                                 | KFC2b       | 0.500 | Hotspot   | 149 | HSener_PosCoop                        | Hotpoint2   | 0.508 | Hotspot   |
| 150 | FX1_int_Energy_vdwcldash              | PB          | 0.498 | Molecular | 150 | FX2_disulfide                         | PB          | 0.507 | Molecular |
| 151 | HSener_PosCoop                        | Hotpoint1   | 0.498 | Hotspot   | 151 | FX1_int_water bonds                   | PB          | 0.500 | Molecular |
| 152 | AP_DOPE_HR                            | AP          | 0.498 | Molecular | 152 | FX1_int_loop_entropy                  | PB          | 0.500 | Molecular |
| 153 | FX2_Energy_vdwcldash                  | PB          | 0.497 | Molecular | 153 | FX1_int_cis_bond                      | PB          | 0.500 | Molecular |
| 154 | CP_GKS                                | CP          | 0.496 | Molecular | 154 | FX1_int_partial covalent interactions | PB          | 0.500 | Molecular |
| 155 | PY_hbond_lr_bb                        | PB          | 0.495 | Molecular | 155 | FX2_water bonds                       | PB          | 0.500 | Molecular |
| 156 | PY_hbond_sr_bb                        | PB          | 0.495 | Molecular | 156 | FX2_loop_entropy                      | PB          | 0.500 | Molecular |
| 157 | SuppHSenergy                          | Hotpoint1   | 0.493 | Hotspot   | 157 | FX2_partial covalent interactions     | PB          | 0.500 | Molecular |
| 158 | FX2_disulfide                         | PB          | 0.492 | Molecular | 158 | RimHSenergy                           | KFC2b       | 0.500 | Hotspot   |
| 159 | FX2_partial covalent interactions     | PB          | 0.489 | Molecular | 159 | RimHS                                 | KFC2b       | 0.500 | Hotspot   |
| 160 | FX2_cis_bond                          | PB          | 0.485 | Molecular | 160 | PY_hbond_sr_bb                        | PB          | 0.497 | Molecular |
| 161 | FX1_int_disulfide                     | PB          | 0.484 | Molecular | 161 | FX1_int_disulfide                     | PB          | 0.495 | Molecular |
| 162 | FX1_int_EntropyComplex                | PB          | 0.484 | Molecular | 162 | FX1_int_EntropyComplex                | PB          | 0.495 | Molecular |
| 163 | FX2_EntropyComplex                    | PB          | 0.483 | Molecular | 163 | FX2_cis_bond                          | PB          | 0.495 | Molecular |
| 164 | CP_MJ2                                | CP          | 0.483 | Molecular | 164 | FX2_EntropyComplex                    | PB          | 0.495 | Molecular |
| 165 | MaxClusterSize                        | Hotpoint2   | 0.481 | Hotspot   | 165 | FX2_Energy_Ionisation                 | PB          | 0.493 | Molecular |
| 166 | FX1_int_Energy_Ionisation             | PB          | 0.481 | Molecular | 166 | PY_hbond_lr_bb                        | PB          | 0.493 | Molecular |
| 167 | HS_PosCoop                            | Hotpoint1   | 0.477 | Hotspot   | 167 | RimHS                                 | RFSpot_KFC2 | 0.493 | Hotspot   |
| 168 | Int_Energy_1                          | Hotpoint1   | 0.476 | Hotspot   | 168 | HS_NegCoop                            | Hotpoint2   | 0.490 | Hotspot   |
| 169 | Int_Energy_1                          | Hotpoint2   | 0.476 | Hotspot   | 169 | ACE19_SOLVation                       | PB          | 0.489 | Molecular |
| 170 | Int_HS_Energy                         | Hotpoint2   | 0.476 | Hotspot   | 170 | RimHSenergy                           | Hotpoint2   | 0.485 | Hotspot   |
| 171 | CP_MS                                 | CP          | 0.474 | Molecular | 171 | MaxClusterSize                        | Hotpoint2   | 0.473 | Hotspot   |
| 172 | ACE19_SOLVation                       | PB          | 0.474 | Molecular | 172 | HS_PosCoop                            | Hotpoint1   | 0.469 | Hotspot   |
| 173 | No_Clusters                           | Hotpoint1   | 0.473 | Hotspot   | 173 | FX1_int_energy_torsion                | PB          | 0.469 | Molecular |
| 174 | PY_pro_close                          | PB          | 0.469 | Molecular | 174 | PY_pro_close                          | PB          | 0.463 | Molecular |
| 175 | HS_NegCoop                            | Hotpoint2   | 0.464 | Hotspot   | 175 | FX2_energy_torsion                    | PB          | 0.461 | Molecular |
| 176 | Int_Energy_1                          | RFSpot      | 0.462 | Hotspot   | 176 | CHARM_vdwaals                         | PB          | 0.448 | Molecular |
| 177 | CP_VD                                 | CP          | 0.462 | Molecular | 177 | No_Clusters                           | Hotpoint1   | 0.448 | Hotspot   |
| 178 | CP_MJ1                                | CP          | 0.461 | Molecular | 178 | AP_DOPE_HR                            | AP          | 0.439 | Molecular |
| 179 | CP_TSC                                | CP          | 0.458 | Molecular | 179 | PY_hbond_sc                           | PB          | 0.437 | Molecular |
| 180 | FX2_Entropy_mainc                     | PB          | 0.455 | Molecular | 180 | FX1_int_Energy_Ionisation             | PB          | 0.433 | Molecular |
| 181 | RimHSenergy                           | RFSpot_KFC2 | 0.454 | Hotspot   | 181 | FX2_Entropy_mainc                     | PB          | 0.413 | Molecular |
| 182 | FX1_int_Entropy_mainc                 | PB          | 0.447 | Molecular | 182 | CP_MJ1                                | CP          | 0.410 | Molecular |
| 183 | RimHSenergy                           | Hotpoint2   | 0.442 | Hotspot   | 183 | FX1_int_Entropy_mainc                 | PB          | 0.405 | Molecular |
| 184 | PY_fa_rep                             | PB          | 0.437 | Molecular | 184 | CP_TES                                | CP          | 0.404 | Molecular |
| 185 | RimHS                                 | RFSpot_KFC2 | 0.435 | Hotspot   | 185 | CHARM_total                           | PB          | 0.390 | Molecular |
| 186 | PY_hbond_sc                           | PB          | 0.416 | Molecular | 186 | AVG_HS_PathLength                     | RFSpot_KFC2 | 0.389 | Hotspot   |
| 187 | HS_PosCoop                            | Hotpoint2   | 0.408 | Hotspot   | 187 | OPUS_PSP3                             | CP          | 0.372 | Molecular |
| 188 | HSener_PosCoop                        | Hotpoint2   | 0.406 | Hotspot   | 188 | FX2_Energy_vdwcldash                  | PB          | 0.365 | Molecular |
| 189 | AVG_HS_PathLength                     | RFSpot_KFC2 | 0.399 | Hotspot   | 189 | FX1_int_Energy_vdwcldash              | PB          | 0.363 | Molecular |
| 190 | CP_RO                                 | CP          | 0.396 | Molecular | 190 | ACE19_SASL                            | PB          | 0.347 | Molecular |
| 191 | ACE19_SASL                            | PB          | 0.384 | Molecular | 191 | MaxClusterSize                        | KFC2a       | 0.335 | Hotspot   |
| 192 | FX1_int_backbone_vdwcldash            | PB          | 0.374 | Molecular | 192 | CP_RO                                 | CP          | 0.332 | Molecular |
| 193 | PY_fa_sol                             | PB          | 0.371 | Molecular | 193 | FX1_int_Entropy_sidec                 | PB          | 0.321 | Molecular |
| 194 | FX2_backbone_vdwcldash                | PB          | 0.370 | Molecular | 194 | FX2_Entropy_sidec                     | PB          | 0.321 | Molecular |
| 195 | FX2_Energy_SolvP                      | PB          | 0.363 | Molecular | 195 | PY_fa_rep                             | PB          | 0.313 | Molecular |
| 196 | CP_TES                                | CP          | 0.360 | Molecular | 196 | AVG_HS_PathLength                     | Hotpoint1   | 0.295 | Hotspot   |
| 197 | MaxClusterSize                        | KFC2a       | 0.359 | Hotspot   | 197 | AVG_HS_PathLength                     | KFC2b       | 0.288 | Hotspot   |
| 198 | FX1_int_Energy_SolvP                  | PB          | 0.356 | Molecular | 198 | FX1_int_backbone_vdwcldash            | PB          | 0.284 | Molecular |
| 199 | FX2_Entropy_sidec                     | PB          | 0.347 | Molecular | 199 | FX2_backbone_vdwcldash                | PB          | 0.283 | Molecular |
| 200 | FX1_int_Entropy_sidec                 | PB          | 0.345 | Molecular | 200 | PY_fa_sol                             | PB          | 0.280 | Molecular |
| 201 | ACE19_SELF                            | PB          | 0.341 | Molecular | 201 | FX2_Energy_SolvP                      | PB          | 0.278 | Molecular |
| 202 | CHARM_gb+sasa                         | PB          | 0.314 | Molecular | 202 | FX1_int_Energy_SolvP                  | PB          | 0.266 | Molecular |
| 203 | CHARM_gb                              | PB          | 0.299 | Molecular | 203 | CHARM_gb+sasa                         | PB          | 0.255 | Molecular |
| 204 | AVG_HS_PathLength                     | Hotpoint1   | 0.294 | Hotspot   | 204 | ACE19_SELF                            | PB          | 0.252 | Molecular |
| 205 | AVG_HS_PathLength                     | KFC2b       | 0.288 | Hotspot   | 205 | CHARM_gb                              | PB          | 0.246 | Molecular |
| 206 | AVG_HS_PathLength                     | RFSpot      | 0.205 | Hotspot   | 206 | AVG_HS_PathLength                     | RFSpot      | 0.215 | Hotspot   |
